*In vivo* identification and validation of novel potential predictors for human cardiovascular diseases

Omar T. Hammouda<sup>1,2</sup>, Meng Yue Wu<sup>1</sup>, Verena Kaul<sup>1</sup>, Thomas Thumberger<sup>1</sup> and Joachim Wittbrodt<sup>1,\*</sup>

<sup>1</sup>Centre for Organismal Studies Heidelberg, Heidelberg University, Im Neuenheimer Feld 230, 69120 Heidelberg, Germany

<sup>2</sup>Heidelberg Biosciences International Graduate School, Heidelberg University, Im Neuenheimer Feld 501, 69120 Heidelberg, Germany

\*Corresponding Author

Running title (40 char): Validating understudied GWAS heart genes

Final character count (with spaces): 19,306

## Abstract

Genetics crucially contributes to cardiovascular diseases (CVDs), the global leading cause of death. Since the majority of CVDs can be prevented by early intervention there is a high demand for predictive markers. While genome wide association studies (GWAS) correlate genes and CVDs after diagnosis and provide a valuable resource for such markers, preferentially those with pre-assigned function are addressed further. To tackle the unaddressed blind spot of understudied genes, we particularly focused on the validation of heart GWAS candidates with little or no apparent connection to cardiac function. Building on the high conservation of basic heart function and underlying genetics from fish to human we combined CRISPR/Cas9 genome editing of the orthologs of human GWAS candidates in isogenic medaka with automated high-throughput heart rate analysis. Our functional analyses of understudied human candidates uncovered a prominent fraction of heart rate associated genes from adult human patients displaying a heart rate effect in embryonic medaka already in the injected generation. Following this pipeline, we identified 16 GWAS candidates with potential diagnostic and predictive power for human CVDs.

Keywords: CRISPR / gene validation / GWAS / heart rate / high throughput analysis

## Introduction

Genetics crucially contributes to the development and progression of cardiovascular diseases (CVDs), the global leading cause of death (Kathiresan & Srivastava 2012; Cambien & Tiet 2007). Elevated resting heart rate in humans has been widely considered as a potential, modifiable risk factor of cardiovascular and all-cause mortality (Beere et al. 1984; DYER et al. 1980; MD et al. 2010; Gillum et al. 1991). Since the majority of CVDs can be prevented by early intervention (McGill et al. 2008) there is a high demand for diagnostic and predictive CVD markers. Genome wide association studies (GWAS) on human patients correlate genes and CVDs after diagnosis and provide a valuable resource for those putative markers (Eicher et al. 2015). However, genes with pre-assigned cardiac functions are usually more likely to be addressed further, while uncharacterized genes or those with no pre-existing evidence to the heart are often neglected. This is likely due to the lack of experimental pipelines for the rapid and robust validation of such markers with implications for heart function. Recently, we demonstrated the power of targeted genome editing in the small animal model system medaka (*Oryzias latipes*) to validate trabeculation-associated genes (Meyer et al. 2020). The ease of manipulation combined with robust acquisition and analysis pipelines highlight the power of using fish embryos in high-throughput applications (Gierten et al.

2020; Shankaran et al. 2018; Lessman 2011; Oxendine et al. 2006). Embryos of fish model systems undergo extrauterine development in a transparent egg. This allows to monitor heart development and heart rate non-invasively in live undisturbed embryos for an extended period of time. Heart development, function and physiology in fish, though simpler, is comparable to mammals (Nemtsas et al. 2010; Yonekura et al. 2018; Gut et al. 2017). Here we combined targeted genome editing via CRISPR/Cas9 (Stemmer et al. 2015) with automated high-throughput imaging and heart rate analysis in isogenic medaka embryos (Gierten et al. 2020) to enable functional analyses directly in the injected generation. We tested the performance our assay with a positive control (*nkx2-5*), evaluated the random discovery rate and analyzed 40 heart associated genes identified from human GWAS. Our assay uncovered that 57% of candidates assigned to human heart rate in GWAS also affected heart rate in fish embryos. We have thus experimentally validated understudied human GWAS candidates, identifying 16 genes with potential diagnostic and predictive power for human CVDs.

## Results

For the straight forward functional validation of GWAS candidates we aimed at combining CRISPR/Cas9-mediated targeted gene inactivation in the injected



generation of medaka embryos with high content screening approaches to validate the impact of the loss-of-function on the heart rate (Fig 1A). As a positive control, we used the cardiac-specific homeobox-containing transcription factor NKX2-5. In human patients, a single amino acid mutation in the homeodomain (R141C) was previously associated with atrial septal defect (ASD) and shown to cause delayed heart morphogenesis in adult mice (Zakariyah et al. 2017). To test our high-throughput imaging and heart rate analysis pipeline for functional *in vivo* gene validation in the injected generation, we targeted the region orthologous to R141C in medaka embryos using the CRISPR/Cas9 system (Stemmer et al. 2015). As a negative control, we targeted the *oculocutaneous albinism 2* locus (*oca2*) (Fukamachi et al. 2004) as a heart-unrelated pigmentation gene. The apparent loss of eye pigmentation phenotype (and degree of mosaicism) was used as a measure for the knock-out efficacy (Lischik et al. 2019; Hammouda et al. 2019). Injections into medaka embryos were performed at the 1-cell stage, resulting in CRISPR/Cas9-mediated mutations exhibiting a degree of genetic mosaicism in the injected embryos hereafter referred to as crispants. To address the impact on the heart rate we raised the medaka crispants until cardiac function was fully developed and the heart rate had reached a plateau at 4 days post fertilization (Gierten et al. 2020) (4 dpf; developmental stage ~31-32 (Iwamatsu 2004)) .

To assess changes in mean heart rate with statistical significance, we took advantage of a 96-well plate format, and imaged multiple biological replicates of crispant embryos (3 rows; n=36 per condition) as well as of *GFP mRNA* mock-injected siblings as internal plate control (2 rows; n=24) (Fig S1A). To assess heart function under different environmental conditions, embryos were imaged at two different temperatures (21 and 28°C, respectively). Heart rates of all embryos were quantitatively determined from the imaging data using the *HeartBeat* software and randomly selected embryos were genotyped to correlate CRISPR/Cas9 targeting (Hammouda et al. 2019).

While mock injected embryos did not show phenotypes, crispants of the positive control *nkx2-5* displayed a variety thereof. These ranged from global severe developmental delays to local cardiac malformations morphologically resembling the phenotypes previously observed in zebrafish *nkx2-5* mutants such as enlarged heart chambers (Fig 1B) (Targoff et al. 2013). Notably, in the negative control (*oca2* crispants) neither cardiac nor developmental phenotypes were observed (Fig 1B), indicating that genome targeting of *oca2* as well as injection and handling of the embryos did not impact on heart and general development per se. Quantitative comparison of cardiac function revealed an overall elevation in the mean heart rate of *nkx2-5* crispants (21°C 99.7 bpm, 28°C 166 bpm) compared to mock control siblings (21°C 96.1 bpm, 28°C 164

bpm) with a significant ( $p = 0.0074$ ) difference at 21°C (Fig 1C; left panel).  
 Notably, independent experimental replicates targeting the same *nkx2-5* exon  
 with two different sgRNAs robustly yielded a significant heart rate phenotype at  
 21°C (Fig S1B-C). In contrast, the mean heart rate in *oca2* crispants was  
 indifferent from mock control at either temperature (21°C 96.4 bpm, 28°C 165  
 bpm), validating *oca2* as bona fide negative control.  
 To avoid severe developmental delays in *nkx2-5* crispants to potentially skew  
 heart rate comparisons, we further applied a developmental focusing filter. Only  
 embryos having developed beyond stage 28 (Iwamatsu 2004), at which cardiac  
 function was previously shown to have reached a functional plateau (Gierten et  
 al. 2020), were chosen for statistical analysis. Developmental focusing, only  
 excluded three embryos from the *nkx2-5* group which did not impact on the  
 results (Fig 1C; right panel). These results underline the robustness of our  
 pipeline and demonstrate its sensitivity to detect mild heart rate phenotypes  
 reflecting cardiac function already at embryonic stages of medaka development.

Next, we determined the baseline probability of heart rate phenotypes by  
 targeting a set of randomly selected genes with CRISPR/Cas9. From a total of  
 23622 annotated medaka coding genes in Ensembl (Yates et al. 2020), we used a  
 random number generator to select 10 genes (Table 1). For each gene, a random

exon was chosen for targeting via CRISPR/Cas9. As before, we used 96-well plates to test two target genes per plate. To control for potential heart rate fluctuations in embryos within and across different experiments, we included mock-injected siblings as internal plate control. Heart rates of target gene crisprants and control siblings were scored and the means were compared before and after developmental focusing. Comparative heart rate analysis of the randomly selected genes revealed a heart rate phenotype in two out of ten genes at both temperatures measured (Fig 2, and Fig S2). Remarkably, both genes, the *oxoglutarate dehydrogenase (ogdh)* and the *cell division control protein 42 homolog (cdc42)* have been previously associated with heart phenotypes in human (GWAS) or were shown to play a role in heart function, respectively (Thanassoulis et al. 2013; Qian et al. 2011; Li et al. 2017). These results confirm the reliability of our assay to identify genes of a given set that affect cardiac function. Of note, repeated rounds of random gene selection revealed a similar mean baseline of 10-20% of selected genes being related to the heart in GWAS or previous experimental reports.

We next applied our pipeline to interrogate a larger, targeted selection of genes associated with cardiovascular diseases in human GWAS. We used GRASP (Eicher et al. 2015), the genome-wide repository of associations between single nucleotide polymorphisms (SNPs) and phenotypes, to compile a list of 40

candidate genes from human GWAS with a coding association to heart phenotypes (hGWAS genes; Table 2). We focused on genes with no prior experimental link to heart function, while including few known heart genes as additional positive controls. To address the specificity of our approach, the selected candidate genes were categorized according to their association into general heart related (n=17) or related specifically to heart rate (n= 23; Table2). Heart rates of candidate gene crispants and control injected siblings were scored and compared before (Fig S4) and after developmental focusing (Fig 3A and Figure S3). Across the hGWAS set of 40 genes, comparative heart rate analysis showed statistically significant heart rate phenotypes in a total of 16 genes (Fig 3B). The five positive controls, known to play key roles in heart functions such as cardiac contraction (*TTN* and *NACA*) and heart rate regulation (*CASQ2*, *KCNH2* and *SCN5A*) (Itoh-Satoh et al. 2002; Park et al. 2010; Faggioni & Knollmann 2012; Gianulis & Trudeau 2011; Zaklyazminskaya & Dzemeshkevich 2016; Huttner et al. 2013) clearly responded in the assay. Beyond known cardiac genes, we revealed new genes linked to various biological functions (*CCDC141*, *GIGYF1*, *HOMEZ*, *MYRF*, *SMG6*, *CMYA5*, *CNOT1*, *SLC17A3*, *TRAPPC12*, *SSPO* and *PADI4*) which up to now, had little to no experimental evidence in cardiac function (Rathjens et al. 2020; Benson et al. 2017; Yamaguchi et al. 2018; Elmen et al. 2020).

When analyzing the candidates according to their GWAS association (“heart rate” and “non-heart rate” phenotypes), we observed a strong positive correlation between the respective phenotypes observed in medaka crispants and the associated phenotype in adult human GWAS. The proportion of heart rate-associated genes in hGWAS that yield a heart rate phenotype in medaka (13/23) was elevated compared to the proportion of non-heart rate-associated genes yielding a heart rate phenotype (3/17). Even when considering the entire group, we observed a higher proportion of genes with an effect on heart rate in our targeted hGWAS gene set (16/40) compared to our randomly selected gene set (2/10) (Fig 3C). Taken together, phenotypes in early medaka embryos likely reflect risk factors in human adults, thus we uncovered functionally relevant heart rate phenotypes in previously uncharacterized genes.

Interestingly, analysis of *scn4ab* crispants displayed a bimodal heart rate distribution, with a population displaying roughly half the average heart rate at both recorded temperatures (Fig 4A). Visual inspection of the *scn4ab* embryos revealed an arrhythmic heart anomaly previously reported in zebrafish mutants (Huttner et al. 2013), i.e. an atrio-ventricular block (AV-block), characterized by a delay or disruption of impulse transmission from the atrium to the ventricle. Scoring the beat frequency of both heart chambers separately in individual

embryos exposed the impaired rhythm of atrial to ventricular contractions, which resulted in a delay or even skipping of ventricular beats in the *scn4ab* crispants but not in control siblings (Fig 4B). *scn4ab* crispants displayed various severities of the AV-block from mild (regular heart beats with occasional beat skipping), to moderate (consistent 2:1 atrial to ventricular contraction; Movie S1), to severe (3:1 or more; Movie S2). Still heavily affected *scn4ab* crispants survived until hatching. Impressively, the prevalence of the arrhythmia phenotype in *scn4ab* crispants was markedly high, exceeding 90% of the injected embryos, reflecting the high efficiency of the Cas9 and the high penetrance of the mutations introduced. These results further underscore the efficacy of using medaka crispant embryo analysis as a rapid validation tool to identify genes with a functional link to human cardiac diseases.

## Discussion

Most cardiovascular diseases can be prevented if diagnosed and treated early. Previous studies have shown the importance of the resting heart rate as a vital risk factor both in terms of prediction and prevention of CVDs (DYER et al. 1980; MD et al. 2010; Eppinga et al. 2016). An increase of 5 beats per minute correlates with a 20% increase in risk of mortality (Eppinga et al. 2016), and

reducing the resting heart rate has proven to improve the clinical outcomes of various CVDs (Beere et al. 1984; MD et al. 2010).

Human GWAS have been performed in search of genetic determinants of CVDs, and although a wide array of candidate genes with various functions are being associated to heart phenotypes in human GWAS, further focus is usually turned to those few genes with pre-existing indication of cardiac function. Other associated genes with an unknown function or without a pre-existing functional link to the heart are often neglected and not pursued further, pushing all those into a blind spot, resulting in a negative loop of discovery. Thus, it is important to address the role of such genes in heart function through experimental validation in model organisms, in pursuit of novel markers for CVD diagnosis. We address this blind spot of discovery by applying a high-throughput heart rate imaging and analysis pipeline coupled to a reverse genetic validation approach via CRISPR/Cas9 mediated mutagenesis in a genetically suited vertebrate model (Fig 1A).

F0 mutagenesis screens are becoming more and more popular (Teboul 2017; Shankaran et al. 2018; Wu et al. 2018; Heyde et al. 2020), largely due to the improvements in CRISPR/Cas9 gene targeting efficiency. Overall, gene targeting in medaka using CRISPR/Cas9 has proven to be highly efficient, as shown by the prominent loss of eye-pigmentation in the *oca2* crispants (Fig 1B



and Fig S1A), as well as in previous studies (Lischik et al. 2019; Hammouda et al. 2019). A similarly high penetrance was also observed in the *scn4ab* crispants, where we detected and quantified severe arrhythmia phenotypes such as AV-block with our assay (Fig 4, Movies S1 and S2). A 90 % prevalence of the arrhythmia phenotype and an absence of global phenotypes further reflect the specificity of this phenotype. Targeting some of the genes in our assays (e.g. *nkx2-5*, *smg6*, *naca*, *ttn.2*, *abcb4*) however, yielded a rather broad range of global developmental phenotypes, potentially reflecting their essential roles in embryonic development. To address this un-avoidable outcome when tackling genes with broader function (e.g. transcription factors or essential genes), we applied a developmental focusing filter in the analysis phase. Doing so, we avoid a biased assessment of the heart rate by ensuring the comparability of the embryo crispants on a global developmental scale, which in turn allows emphasizing cardiac-specific effects. Interestingly however, developmental focusing, although deemed important, in only few cases significantly altered the outcome of the analysis (Fig. S4). This reflects the robustness of the assay and the homogeneity of CRISPR/Cas9-induced phenotypes in the isogenic background of the medaka line used.

In a set of ten randomly chosen genes we observed a baseline occurrence of heart-affecting genes of about 20 % (Fig 2, and Fig S2). Relevantly, both genes

were implicated in heart functions, further reflecting the reliability of our model and approach. For *cdc42*, there is *a priori* evidence of its human orthologue in heart development as well as in regulating heart function across species (Qian et al. 2011; Li et al. 2017). Surprisingly, we did not find any associations (coding or non-coding) of *CDC42* to heart phenotypes in human GWAS according to the GRASP database (Eicher et al. 2015). As for *ogdh*, no experimental evidence in cardiac function has been previously reported, but a polymorphism located on one of its exons has been associated to heart phenotypes in human GWAS (Thanassoulis et al. 2013). Except for *duox*, which has been reported as having an indirect role in cardiac regeneration in zebrafish (Han et al. 2014), none of the other randomly selected genes were, to our knowledge, ever connected with cardiac function. In summary, from our random selection of genes, the only ones showing an effect (*ogdh* and *cdc42*) are connected to cardiac function by prior evidence. All but one positive (*HCN4*) controls among the hGWAS candidates resulted in a pronounced heart rate phenotype in our assay, reflecting their role in cardiac contraction (*TTN* and *NACA*), cardiac conduction and heart rate regulation (*CASQ2*, *KCNH2* and *SCN5A*) (Itoh-Satoh et al. 2002; Park et al. 2010; Faggioni & Knollmann 2012; Gianulis & Trudeau 2011; Zaklyazminskaya & Dzemeshevich 2016; Huttner et al. 2013). For *hcn4*, we suspect compensation by the other medaka paralog *hcn4l*.

For eleven hGWAS candidate genes, our analysis provided the first experimental evidence validating a cardiac function. The identified genes represent new targets for future in-depth characterization and as candidates for predicting heart diseases prior to their onset. This is impressively substantiated by the emerging studies on the CCR4-NOT (*CNOT1*) complex in heart structure and function (Yamaguchi et al. 2018; Elmen et al. 2020).

Grouping the candidate genes according to their heart GWAS association into heart rate and non-heart rate-related phenotypes further exposed the prominent positive correlation between the associated human phenotype and the observed phenotype in medaka (Fig 3C).

Medaka's isogenic background, a product of inbreeding over multiple generations (Wittbrodt et al. 2002), enabled the detection of subtle changes in heart rate immediately in F0 crispants. This accelerated the analysis and avoided the necessity to analyze homozygous offspring in the second and third generation after CRISPR targeting.

It is noteworthy that despite the evolutionary distance from fish to humans the medaka phenotypes match the class of hGWAS effects. This is even more relevant since the roles of the genes in medaka were validated in embryos, suggesting that the validated marker genes have predictive power in humans. This deep functional conservation emphasizes the potential of our approach for

the identification and validation of novel predictive genetic markers for cardiovascular diseases in humans. We have showcased a highly versatile, sensitive and robust high-throughput reverse genetic validation assay to address the pool of understudied, neglected putative candidates. In the future, the combination of genetic validation and drug screening in a single platform building on our assay will facilitate the simultaneous identification of novel genetic players and interacting small molecules with rescuing power.

## Materials and Methods

### *Ethics Statement*

All fish are maintained in closed stocks at Heidelberg University. Medaka (*Oryzias latipes*) husbandry (permit number 35–9185.64/BH Wittbrodt, Regierungspräsidium Karlsruhe) was performed according to local animal welfare standards (Tierschutzgesetz §11, Abs. 1, Nr. 1) in accordance with European Union animal welfare guidelines (Bert et al., 2016). The fish facility is under the supervision of the local representative of the animal welfare agency. Medaka embryos of the wildtype Cab strain were used at stages prior to stage 42. Medaka were raised and maintained as described previously (Köster et al., 1997).

## *Candidate gene selection*

For the unbiased gene targeting, an online random number generator was used to generate 10 numbers between 1 and 23622, corresponding to the number of annotated medaka coding genes in Ensembl (Yates et al. 2020) (Table 1). The number of exons for each gene was counted and a random number was generated to select the exon for CRISPR/Cas9 targeting. For the targeted human heart-GWAS (hGWAS) gene selection, the genome-wide repository of associations between SNPs and phenotypes (GRASP v2.0) was used (Eicher et al. 2015). In the search field, “Heart” and “Heart rate” were chosen as the respective categories for all heart- and heart rate-related phenotypes associated in human GWAS, only coding SNPs (i.e. SNP functional class = exons) were searched for. List of resulting genes was extracted (Table 2), and candidate genes for the functional validation assay were chosen. The focus was on uncharacterized genes, or genes with no prior experimental link to heart function, yet some known heart genes were included as proof of concept. For each hGWAS candidate gene, the corresponding medaka ortholog was extracted using Ensembl (Yates et al. 2020). For the few genes which did not have an annotated medaka ortholog, the human protein sequence was BLASTed using the “tblastn” function of the NCBI BLAST (<https://blast.ncbi.nlm.nih.gov/Blast.cgi>) and Ensemble

(<http://www.ensembl.org/Multi/Tools/Blast>) online tools to obtain a target medaka locus. Using Geneious 8.1.9 (<https://www.geneious.com>), regions of interest (ROI) on medaka orthologous genes for CRISPR targeting were primarily chosen based on the corresponding location of human SNP when aligning the medaka and human protein sequences.

*sgRNA target sites selection and in vitro transcription*

All sgRNA target sites used in this study are listed in Table S1. sgRNAs were designed with CCTop as described in Stemmer et al. (Stemmer et al. 2015). sgRNA target sites were selected based on number of potential off-target sites and their corresponding mismatches. Preferably, sgRNAs selected had no off-target site or at least 3 nucleotide mismatches. sgRNAs for *oca2* were the same as in Lischik et al. (Lischik et al. 2019). Cloning of sgRNA templates and *in vitro* transcription was performed as detailed in Stemmer, et al. (Stemmer et al. 2015). All sgRNAs were initially tested after synthesis for *in vivo* targeting via injections into medaka embryos, followed by genotyping using our filter-in-tips protocol (Hammouda et al. 2019), in brief terms, by PCR amplification of target locus followed by T7 Endonuclease I assay (New England Biolabs).

# *Microinjection*

Medaka one-cell stage embryos were injected in the cytoplasm as previously described (Stemmer et al. 2015). Injection solutions for CRISPR targeting comprised: 150 ng/μl *Cas9* mRNA, 15 ng/μl respective sgRNA and 10 ng/μl *GFP* mRNA as injection tracer. Control siblings were injected with of 10 ng/μl *GFP* mRNA only. Injected embryos were incubated at 28 °C in embryo rearing medium (ERM), screened for GFP expression at 1 dpf and transferred to methylene blue-containing ERM and incubated at 28 °C until analysis (4 dpf).

#### *Sample preparation and Imaging*

One day prior to imaging, medaka embryos were transferred from methylene blue-containing ERM into plain ERM and incubated at 28 °C. On day of imaging (4 dpf), individual medaka embryos (36 per sgRNA and 24 control injected) were administered to a 96 U-well microtiter plate (Nunc, Thermofisher #268152) containing 200 μl ERM per well and sealed using gas-permeable adhesive foil (4titude, Wotton, UK, 4ti-0516/96). Plates were automatically imaged using an ACQUIFER Imaging Machine (DITABIS AG, Pforzheim, Germany) at 21 and 28 °C with a 30-minute equilibration period before each measurement. Images were acquired in brightfield using 130 z-slices ( $dz = 0$  μm) and a 2x Plan UW N.A. 0.06 objective (Nikon, Düsseldorf, Germany) to capture the centered embryo. Integration times were fixed with 80 % relative

white LED intensity and 10 ms exposure time. Therefore, the whole 96-well plate was captured, with image sequences (videos) of entire microwells of approx. 10 seconds with 13 frames per second (fps). More details can be found in Gierten, et al. (Gierten et al. 2020).

### *HeartBeat* detection and data analysis

Image optimizations prior to analysis, as well as heart rate analysis using the *HeartBeat* software were performed as previously described (Gierten et al. 2020). In some instances, heart rates could not be scored due to inconvenient embryo orientations shielding the view of the heart. For *scn4ab* crispants with cardiac arrhythmias, atrium and ventricle for individual embryos were separately segmented, and the respective beating frequency for each chamber was measured. Data plots were generated using ggplot2 package (Wickham 2016) in R 3.6.1 (R Core Team, 2019) and R-studio 1.2.1335 (RStudio Team, 2018). Statistical analysis for heart rate comparisons were computed in R. Significant differences were determined by two-tailed Student's t-test. Significant *p*-values are indicated with asterisks (\*) with  $*p < 0.05$ ,  $**p < 0.01$ ,  $***p < 0.001$  and ns (not significant).

### *Embryo genotyping*



Nucleic acid extraction and genotyping of embryos was done as previously described (Hammouda et al. 2019). Briefly, after imaging, embryos in 96-well plate were lysed in 50 µl Milli-Q water + 50 µl Fin-Clip lysis buffer each (0.4 M Tris-HCl pH 8.0, 5 mM EDTA pH 8.0, 0.15 M NaCl, 0.1 % SDS in Milli-Q water) using a custom 96-well mortar. The mortar was pre-cleaned by incubation in hypochlorite solution (1:10 dilution of commercial bleach reagent) for at least 15 minutes followed by 5 minutes incubation in Milli-Q water. Plates containing lysed embryos were stored at 4 °C until genotyping. To confirm CRISPR on-target activity, per experimental plate, 2 embryos per condition were chosen at random for genotyping by PCR amplification of target locus using our filter-in-tips approach (Hammouda et al. 2019), followed by T7 Endonuclease I Assay (New England Biolabs). 30 PCR cycles were run in all samples, all primers used for PCR are listed in Table S2. Annealing temperatures were calculated using the online NEB T<sub>m</sub> calculator (<https://tmcalculator.neb.com/>).

## Acknowledgments

We thank J. Gierten, V. Weinhardt, E. Tsingos and all members of the Wittbrodt lab for their critical, constructive feedback on the procedure and the manuscript, F. Loosli and S. Lemke for their constructive feedback towards the project as

well as J. Backs and E. Furlong for an outside perspective. We thank T. Kellner for excellent technical support. We acknowledge the excellent fish husbandry of E. Leist, M. Majewsky and A. Saraceno. We thank J. Gehrig (ACQUIFER Imaging GmbH) for supporting us with the Imaging machine. This research was funded through DFG CRC-1324 TP B4 and NIH 5R01ES029917 – 03, KiyosuTox. O.T.H. is a member of the Heidelberg Biosciences International Graduate School (HBIGS) and was supported by a fellowship of the Deutsches Zentrum für Herz-Kreislauf-Forschung (DZHK).

#### Author contributions

O.T.H., T.T. and J.W. designed the study and implemented the methodology. O.T.H., V.K. and M.Y.W. synthesized the guides. O.T.H. performed experiments. O.T.H. analyzed the data with contributions by M.Y.W. and V.K.. O.T.H. visualized data. O.T.H. and J.W. wrote the first draft of the manuscript. O.T.H., T.T., and J.W. finalized the manuscript. J.W. provided resources and supervised this work.

#### Conflict of interest

All authors declare no competing interests.

# References

- Beere, P.A., Glagov, S. & Zarins, C.K., 1984. Retarding effect of lowered heart rate on coronary atherosclerosis. *Science*, 226(4671), p.180.
- Benson, M.A. et al., 2017. Ryanodine receptors are part of the myospryn complex in cardiac muscle. *Scientific Reports*, pp.1–12.
- Bert, B. et al., 2016. Considerations for a European animal welfare standard to evaluate adverse phenotypes in teleost fish. *The EMBO Journal*, 35(11), pp.1151–1154.
- Cambien, F. & Tiret, L., 2007. Genetics of Cardiovascular Diseases. *Circulation*, 116(15), pp.1714–1724.
- Cordell, H.J. et al., 2013. Genome-wide association study identifies loci on 12q24 and 13q32 associated with Tetralogy of Fallot. *Human Molecular Genetics*, 22(7), pp.1473–1481.
- DYER, A.R. et al., 1980. HEART RATE AS A PROGNOSTIC FACTOR FOR CORONARY HEART DISEASE AND MORTALITY: FINDINGS IN THREE CHICAGO EPIDEMIOLOGIC STUDIES. *American Journal of Epidemiology*, 112(6), pp.736–749.
- Eicher, J.D. et al., 2015. GRASP v2.0: an update on the Genome-Wide Repository of Associations between SNPs and phenotypes. *Nucleic Acids Research*, 43(D1), pp.D799–D804.
- Eijgelsheim, M. et al., 2010. Genome-wide association analysis identifies multiple loci related to resting heart rate. *Human Molecular Genetics*, 19(19), pp.3885–3894.
- Elmen, L. et al., 2020. Silencing of CCR4-NOT complex subunits affect heart structure and function. *Disease Models & Mechanisms*, pp.dmm.044727–33.
- Eppinga, R.N. et al., 2016. Identification of genomic loci associated with resting heart rate and shared genetic predictors with all-cause mortality. *Nature Genetics*, 48(12), pp.1557–1563.
- Faggioni, M. & Knollmann, B.C., 2012. Calsequestrin 2 and arrhythmias. *American Journal of Physiology-Heart and Circulatory Physiology*, 302(6), pp.H1250–H1260.

- 467 Fukamachi, S. et al., 2004. Conserved function of medaka pink-eyed dilution in  
468 melanin synthesis and its divergent transcriptional regulation in gonads  
469 among vertebrates. *Genetics*, 168(3), pp.1519–1527.
- 470 Gianulis, E.C. & Trudeau, M.C., 2011. Rescue of Aberrant Gating by a  
471 Genetically Encoded PAS (Per-Arnt-Sim) Domain in Several Long QT  
472 Syndrome Mutant Human Ether-á-go-go-related Gene Potassium Channels.  
473 *Journal of Biological Chemistry*, 286(25), pp.22160–22169.
- 474 Gierten, J. et al., 2020. Automated high-throughput heartbeat quantification in  
475 medaka and zebrafish embryos under physiological conditions. *Scientific*  
476 *Reports*, pp.1–12.
- 477 Gillum, R.F., Makuc, D.M. & Feldman, J.J., 1991. Pulse rate, coronary heart  
478 disease, and death: The NHANES I Epidemiologic Follow-up Study.  
479 *American Heart Journal*, 121(1), pp.172–177.
- 480 Gut, P. et al., 2017. Little Fish, Big Data: Zebrafish as a Model for  
481 Cardiovascular and Metabolic Disease. *Physiological Reviews*, 97(3),  
482 pp.889–938.
- 483 Hammouda, O.T. et al., 2019. Swift Large-scale Examination of Directed  
484 Genome Editing S. C. F. Neuhauss, ed. *PLoS ONE*, 14(3), pp.e0213317–11.
- 485 Han, P. et al., 2014. Hydrogen peroxide primes heart regeneration with a  
486 derepression mechanism. *Nature Publishing Group*, pp.1–17.
- 487 Heyde, von der, B. et al., 2020. Translating GWAS-identified loci for cardiac  
488 rhythm and rate using an in vivo image- and CRISPR/Cas9-based approach.  
489 *Scientific Reports*, pp.1–18.
- 490 Hiura, Y. et al., 2010. A Genome-Wide Association Study of Hypertension-  
491 Related Phenotypes in a Japanese Population. *Circulation Journal*, 74(11),  
492 pp.2353–2359.
- 493 Hoed, den, M. et al., 2013. Identification of heart rate-associated loci and their  
494 effects on cardiac conduction and rhythm disorders. *Nature Genetics*, pp.1–  
495 14.
- 496 Holm, H. et al., 2011. A rare variant in MYH6 is associated with high risk of  
497 sick sinus syndrome. *Nature Genetics*, 43(4), pp.316–320.

- 498 Hu, Z. et al., 2013. A genome-wide association study identifies two risk loci for  
499 congenital heart malformations in Han Chinese populations. *Nature*  
500 *Genetics*, pp.1–5.
- 501 Huttner, I.G. et al., 2013. A transgenic zebrafish model of a human cardiac  
502 sodium channel mutation exhibits bradycardia, conduction-system  
503 abnormalities and early death. *Journal of Molecular and Cellular*  
504 *Cardiology*, 61(C), pp.123–132.
- 505 Ikram, M.A. et al., 2009. Genomewide Association Studies of Stroke. *New*  
506 *England Journal of Medicine*, 360(17), pp.1718–1728.
- 507 Itoh-Satoh, M. et al., 2002. Titin Mutations as the Molecular Basis for Dilated  
508 Cardiomyopathy. *Biochemical and Biophysical Research Communications*,  
509 291(2), pp.385–393.
- 510 Iwamatsu, T., 2004. Stages of normal development in the medaka *Oryzias*  
511 *latipes*. *Mechanisms of Development*, 121(7-8), pp.605–618.
- 512 Kathiresan, S. & Srivastava, D., 2012. Genetics of Human Cardiovascular  
513 Disease. *Cell*, 148(6), pp.1242–1257.
- 514 Koster, R. et al., 1997. Medaka spalt acts as a target gene of hedgehog signaling.  
515 *Development*, 124(16), p.3147.
- 516 Lessman, C.A., 2011. The developing zebrafish (*Danio rerio*): A vertebrate  
517 model for high-throughput screening of chemical libraries R. S. Tuan, ed.  
518 *Birth Defects Research Part C: Embryo Today: Reviews*, 93(3), pp.268–280.
- 519 Li, J. et al., 2017. Essential role of Cdc42 in cardiomyocyte proliferation and  
520 cell-cell adhesion during heart development. *Developmental Biology*, 421(2),  
521 pp.271–283.
- 522 Lischik, C.Q., Adelman, L. & Wittbrodt, J., 2019. Enhanced in vivo-imaging in  
523 medaka by optimized anaesthesia, fluorescent protein selection and removal  
524 of pigmentation C. Winkler, ed. *PLoS ONE*, 14(3), pp.e0212956–19.
- 525 Marroni, F. et al., 2009. A Genome-Wide Association Scan of RR and QT  
526 Interval Duration in 3 European Genetically Isolated Populations.  
527 *Circulation: Cardiovascular Genetics*, 2(4), pp.322–328.

528 Matsa, L.S. et al., 2014. Endothelin 1 gene as a modifier in dilated  
529 cardiomyopathy. *Gene*, 548(2), pp.256–262.

530 McGill, H.C., Jr, McMahan, C.A. & Gidding, S.S., 2008. Preventing Heart  
531 Disease in the 21st Century. *Circulation*, 117(9), pp.1216–1227.

532 MD, P.M.B. et al., 2010. Heart rate as a risk factor in chronic heart failure  
533 (SHIFT): the association between heart rate and outcomes in a randomised  
534 placebo-controlled trial. *The Lancet*, 376(9744), pp.886–894.

535 Meyer, H.V. et al., 2020. Genetic and functional insights into the fractal  
536 structure of the heart. *Nature*, pp.1–25.

537 Nemtsas, P. et al., 2010. Adult zebrafish heart as a model for human heart? An  
538 electrophysiological study. *Journal of Molecular and Cellular Cardiology*,  
539 48(1), pp.161–171.

540 Newton-Cheh, C. et al., 2009. Common variants at ten loci influence QT  
541 interval duration in the QTGEN Study. *Nature Genetics*, 41(4), pp.399–406.

542 Oxendine, S.L. et al., 2006. Adapting the medaka embryo assay to a high-  
543 throughput approach for developmental toxicity testing. *NeuroToxicology*,  
544 27(5), pp.840–845.

545 Paré, G. et al., 2013. Genetic Determinants of Dabigatran Plasma Levels and  
546 Their Relation to Bleeding. *Circulation*, 127(13), pp.1404–1412.

547 Park, C.Y. et al., 2010. skNAC, a Smyd1-interacting transcription factor, is  
548 involved in cardiac development and skeletal muscle growth and  
549 regeneration. *Proc Natl Acad Sci USA*, 107(48), p.20750.

550 Pfeufer, A. et al., 2009. Common variants at ten loci modulate the QT interval  
551 duration in the QTSCD Study. *Nature Genetics*, 41(4), pp.407–414.

552 Qian, L. et al., 2011. Tinman/Nkx2-5 acts via miR-1 and upstream of Cdc42 to  
553 regulate heart function across species. *The Journal of Cell Biology*, 193(7),  
554 pp.1181–1196.

555 R Core Team (2019). R: A language and environment for statistical computing.  
556 R Foundation for Statistical Computing, Vienna, Austria. URL  
557 <https://www.R-project.org/>



558 Rathjens, F.S. et al., 2020. Preclinical evidence for the therapeutic value of  
559 TBX5 normalization in arrhythmia control. *Cardiovascular Research*.

560 Ritchie, M.D. et al., 2013. Genome- and Phenome-Wide Analyses of Cardiac  
561 Conduction Identifies Markers of Arrhythmia Risk. *Circulation*, 127(13),  
562 pp.1377–1385.

563 RStudio Team (2018). RStudio: Integrated Development for R. RStudio, Inc.,  
564 Boston, MA URL <http://www.rstudio.com/>

565 Shankaran, S.S. et al., 2018. CRISPR/Cas9-Directed Gene Editing for the  
566 Generation of Loss-of-Function Mutants in High-Throughput Zebrafish F  
567 OScreens. *Current Protocols in Molecular Biology*, 119(1), pp.4257–22.

568 Smith, J.G. et al., 2009. Genome-wide association study of electrocardiographic  
569 conduction measures in an isolated founder population: Kosrae. *HRTHM*,  
570 6(5), pp.634–641.

571 Sotoodehnia, N. et al., 2010. Common variants in 22 loci are associated with  
572 QRS duration and cardiac ventricular conduction. *Nature Genetics*, pp.1–11.

573 Stemmer, M. et al., 2015. CCTop: An Intuitive, Flexible and Reliable  
574 CRISPR/Cas9 Target Prediction Tool S. Maas, ed. *PLoS ONE*, 10(4),  
575 pp.e0124633–11.

576 Targoff, K.L. et al., 2013. Nkx genes are essential for maintenance of ventricular  
577 identity. *Development*, 140(20), pp.4203–4213.

578 Teboul, L., 2017. Phenotyping first-generation genome editing mutants: a new  
579 standard? *Mammalian Genome*, 28(7), pp.377–382.

580 Thanassoulis, G. et al., 2013. Genetic Associations with Valvular Calcification  
581 and Aortic Stenosis. *New England Journal of Medicine*, 368(6), pp.503–512.

582 Vasan, R.S. et al., 2009. Genetic Variants Associated With Cardiac Structure  
583 and Function: A Meta-analysis and Replication of Genome-wide Association  
584 Data. *JAMA*, 302(2), pp.168–178.

585 Villard, E. et al., 2011. A genome-wide association study identifies two loci  
586 associated with heart failure due to dilated cardiomyopathy. *European Heart*  
587 *Journal*, 32(9), pp.1065–1076.

- Wickham, H., 2016. *ggplot2: Elegant Graphics for Data Analysis*, Springer-Verlag New York. Available at: <https://ggplot2.tidyverse.org>.
- Wittbrodt, J., Shima, A. & Scharl, M., 2002. MEDAKA — A MODEL ORGANISM FROM THE FAR EAST. *Nature Reviews Genetics*, 3(1), pp.53–64.
- Wooten, E.C. et al., 2010. Application of Gene Network Analysis Techniques Identifies AXIN1/PDIA2 and Endoglin Haplotypes Associated with Bicuspid Aortic Valve A. E. Toland, ed. *PLoS ONE*, 5(1), pp.e8830–10.
- Wu, R.S. et al., 2018. A Rapid Method for Directed Gene Knockout for Screening in G0 Zebrafish. *Developmental Cell*, 46(1), pp.112–125.e4.
- Yamaguchi, T. et al., 2018. The CCR4-NOT deadenylase complex controls Atg7-dependent cell death and heart function. *Sci. Signal.*, 11(516), p.eaan3638.
- Yates, A.D. et al., 2020. Ensembl 2020. *Nucleic Acids Research*, 48(D1), pp.D682–D688.
- Yonekura, M. et al., 2018. Medaka as a model for ECG analysis and the effect of verapamil. *Journal of Pharmacological Science*, 137(1), pp.55–60.
- Zakariyah, A.F. et al., 2017. Congenital heart defect causing mutation in Nkx2.5 displays in vivo functional deficit. *Journal of Molecular and Cellular Cardiology*, 105(C), pp.89–98.
- Zaklyazminskaya, E. & Dzemeshevich, S., 2016. The role of mutations in the SCN5A gene in cardiomyopathies. *BBA - Molecular Cell Research*, 1863(Part B), pp.1799–1805.

## Main Figure Legends

Figure 1 - Medaka *nkx2-5* embryo crispants show heart rate phenotypes

A Schematic overview of functional gene validation pipeline: position of human coding SNP mapped to medaka orthologous gene to define region of interest for



CRISPR/Cas9 gene targeting (double strand break; DSB). 96-well plate layout of embryo crispants (Target Gene 1 and 2) separated by *GFP* mRNA mock-injected siblings. Embryos are subjected to high-throughput imaging followed by automated heart detection (blue area) and heart rate quantification (graphical output; *HeartBeat* software (Gierten et al. 2020).

**B** Comparison of the atrium (A, dotted red line) and ventricle (V, dotted yellow line) in *GFP*-injected (mock) and *nkx2-5* and *oca2* crispant embryos (stage 40). Note: *nkx2-5* crispant shows dilated heart chambers while mock injected and *oca2* crispant embryos are indistinguishable. Loss of eye pigmentation in *oca2* crispants reflects high efficiency of knock-out rate in the injected generation.

**C** Heart rate measurements (beats per minute, bpm) of *GFP*-injected (mock; dark grey), *nkx2-5* and *oca2* embryo crispants (4 dpf) at 21 and 28°C, before (left) and after (right) exclusion of severely affected embryos (developmental focusing) reveal elevation of mean heart rates in *nkx2-5* targeted embryos, significant at 21°C (red). Significance was determined by two-tailed Student's t-test; \* $p < 0.05$ , \*\* $p < 0.01$ , ns (not significant; light grey). For biological replicates see Source Data Fig 1C.

Figure 2 - Baseline probability of heart rate phenotype assessed via *in vivo* targeting of randomly selected genes

**A** Heart rate measurements (beats per minute, bpm) of *GFP*-injected (mock) and corresponding sibling embryo crispants at 21 and 28°C after developmental focusing. Different experimental plates are represented by breaks on the x-axis. Significant differences in mean heart rates were determined between each embryo crispant group and its corresponding sibling control group by two-tailed Student's t-test; \* $p < 0.05$ , \*\*\* $p < 0.001$ , ns (not significant). Crispants showing significant heart rate phenotype (red), *GFP*-injected controls (mock; dark grey), crispants showing no significant heart rate phenotype (light grey).

**B** Heatmap quantitative representation of the data shown in (A); for each measured temperature, the percent change in mean heart rate (HR % Change) between crispants and their corresponding control sibling, flanked by the statistical significance ( $p$ -value) of the observed change calculated by two-tailed Student's t-test on the full distribution in (A). Genes showing significant heart rate phenotypes are indicated in bold. For biological replicates see Source Data Fig S2.

Figure 3 - Targeted human heart-GWAS validations reveal new genes affecting heart rate

**A** Heatmap quantitative representation of the comparative heart rate analysis between each embryo crispant group and its corresponding control sibling group

after developmental focusing (also see plots in Fig S3); for each measured temperature, the percent change in mean heart rate (HR % Change) between crispants and their corresponding control sibling, flanked by the statistical significance ( $p$ -value) of the observed change calculated by two-tailed Student's t-test on the full distribution (Fig S3). Genes showing significant heart rate phenotypes are indicated in bold. For biological replicates see Source Data Fig S3.

**B** Venn diagram summarizing the genes with significantly different heart rate (HR) phenotypes only at 21°C, only at 28°C or at both temperatures (dark grey).

**C** Stacked plots representing percentage of genes showing a significant heart rate phenotype (dark grey) in each group. Number of genes for each group is denoted (n). hGWAS corresponds to the selection of genes associated to heart phenotypes in human GWAS.

Figure 4 - AV-block type arrhythmia in medaka *scn4ab* embryo crispants

**A** Heart rate measurements (beats per minute, bpm) of *GFP*-injected (mock; dark grey) and *scn4ab* crispant (red) embryos at 21 and 28°C; note the bimodal distribution in *scn4ab* crispants.

**B** Paired plots showing heart rate scores for each chamber separately (atrium in blue; ventricle in red) in individual embryos at both temperatures.

676

677 Tables and their legends

678 *Table 1. List of randomly selected genes*

679 Medaka Ensembl gene names and codes, as well as orthologous human genes as  
680 annotated in the 95<sup>th</sup> Ensembl release.

681

682 *Table 2. List of candidate genes extracted from Human GWAS using GRASP 2.0*

683 *Database*

684 Human genes are categorized according to their association into “heart rate”  
685 (bold) and “non-heart rate” (non-bold) related phenotypes in human GWAS.

686

687 *Table S1. List of sgRNAs used*

688 sgRNA target sites given in 5’-3’ direction, protospacer adjacent motif (PAM)  
689 in square brackets.

690

691 *Table S2. List of primers used for genotyping by PCR*

692 Source Data Fig 1C. Biological replicates for Fig 1C

693 Source Data Fig S1. Biological replicates for Fig S1 B-C

694 Source Data Fig S2. Biological replicates for Fig 2 and S2

695 Source Data Fig S3. Biological replicates for Fig 3A, S3 and S4

32

696

697 Supplementary Figure legends

698 Figure S1: Consistent heart rate phenotype observed in medaka *nkx2-5* crispants

699 **A** Overview of 96-well plate with embryos injected with sgRNA against *nkx2-5*

700 or *oca2*, as well as embryos mock injected with *gfp mRNA* (Fig 1C). Note the

701 loss of eye pigmentation in *oca2* crispant embryos.

702 **B-C** Heart rate measurements of *GFP*-injected (mock; dark grey) and *nkx2-5*

703 embryo crispants (**B**: second replicate of *nkx2-5\_T4*; **C**: different sgRNA *nkx2-*

704 *5\_T5* targeting same region of interest) at 21 and 28°C, before and after

705 exclusion of severely affected embryos (< stage 28; developmental focusing).

706 Significant differences are shown in red and were determined by two-tailed

707 Student's t-test; \* $p < 0.05$ , \*\* $p < 0.01$ , ns (not significant; light grey). For

708 biological replicates see Source Data Fig S1.

709

710 Figure S2: Developmental focusing does not alter analysis outcome of random

711 gene selection

712 Heatmap quantitative representation of the comparative heart rate analysis

713 between each embryo crispant group and its corresponding control sibling group

714 before and after developmental focusing; for each measured temperature, the

715 percent change in mean heart rate (HR % Change) between crispants and their

33

corresponding control sibling, flanked by the statistical significance ( $p$ -value) of the observed change calculated by two-tailed Student's  $t$ -test on the full distribution. Genes showing significant heart rate phenotypes are indicated in bold. For biological replicates see Source Data Fig S2.

Figure S3: Comparative analysis of mean heart rates in targeted hGWAS gene selection

Heart rate measurements (beats per minute, bpm) of *GFP*-injected (mock; dark grey) and corresponding sibling embryo crispants at 21 and 28°C after developmental focusing (also see heatmap representation of the data in Fig 3A).

Different experimental plates are represented by breaks on the x-axis.

Significant differences in mean heart rates were determined between each embryo crispant group and its corresponding sibling control group by two-tailed Student's  $t$ -test;  $*p < 0.05$ ,  $**p < 0.01$ ,  $***p < 0.001$ , ns (not significant). Red groups correspond to crispants showing significant heart rate phenotypes, and light grey groups correspond to crispants showing no significant heart rate phenotype. For biological replicates see Source Data Fig S3.

Fig S4: Developmental focusing does not alter analysis outcome of targeted hGWAS genes

Heatmap quantitative representation of the comparative heart rate analysis between each embryo crispant group and its corresponding control sibling group before and after developmental focusing; for each measured temperature, the percent change in mean heart rate (HR % Change) between crispants and their corresponding control siblings, flanked by the statistical significance ( $p$ -value) of the observed change, calculated by two-tailed Student's  $t$ -test on the full distribution. Genes showing significantly different heart rate phenotypes are indicated in bold. For biological replicates see Source Data Fig S3.

Movie S1: Moderate AV-block arrhythmia observed in medaka *scn4ab* crispants Side by side comparison of rhythmic heartbeat of *GFP*-injected (mock; left) and arrhythmic *scn4ab* crispants displaying 2:1 AV-block phenotype (right). Videos of medaka embryos (stage 36) were acquired using a stereomicroscope under bright field illumination.

Movie S2: Severe AV-block arrhythmia observed in medaka *scn4ab* crispants Side by side comparison of rhythmic heartbeat of *GFP*-injected (mock; left) and arrhythmic *scn4ab* crispants displaying severe AV-block phenotype (right). Videos of medaka embryos (stage 40) were acquired using a stereomicroscope under bright field illumination.



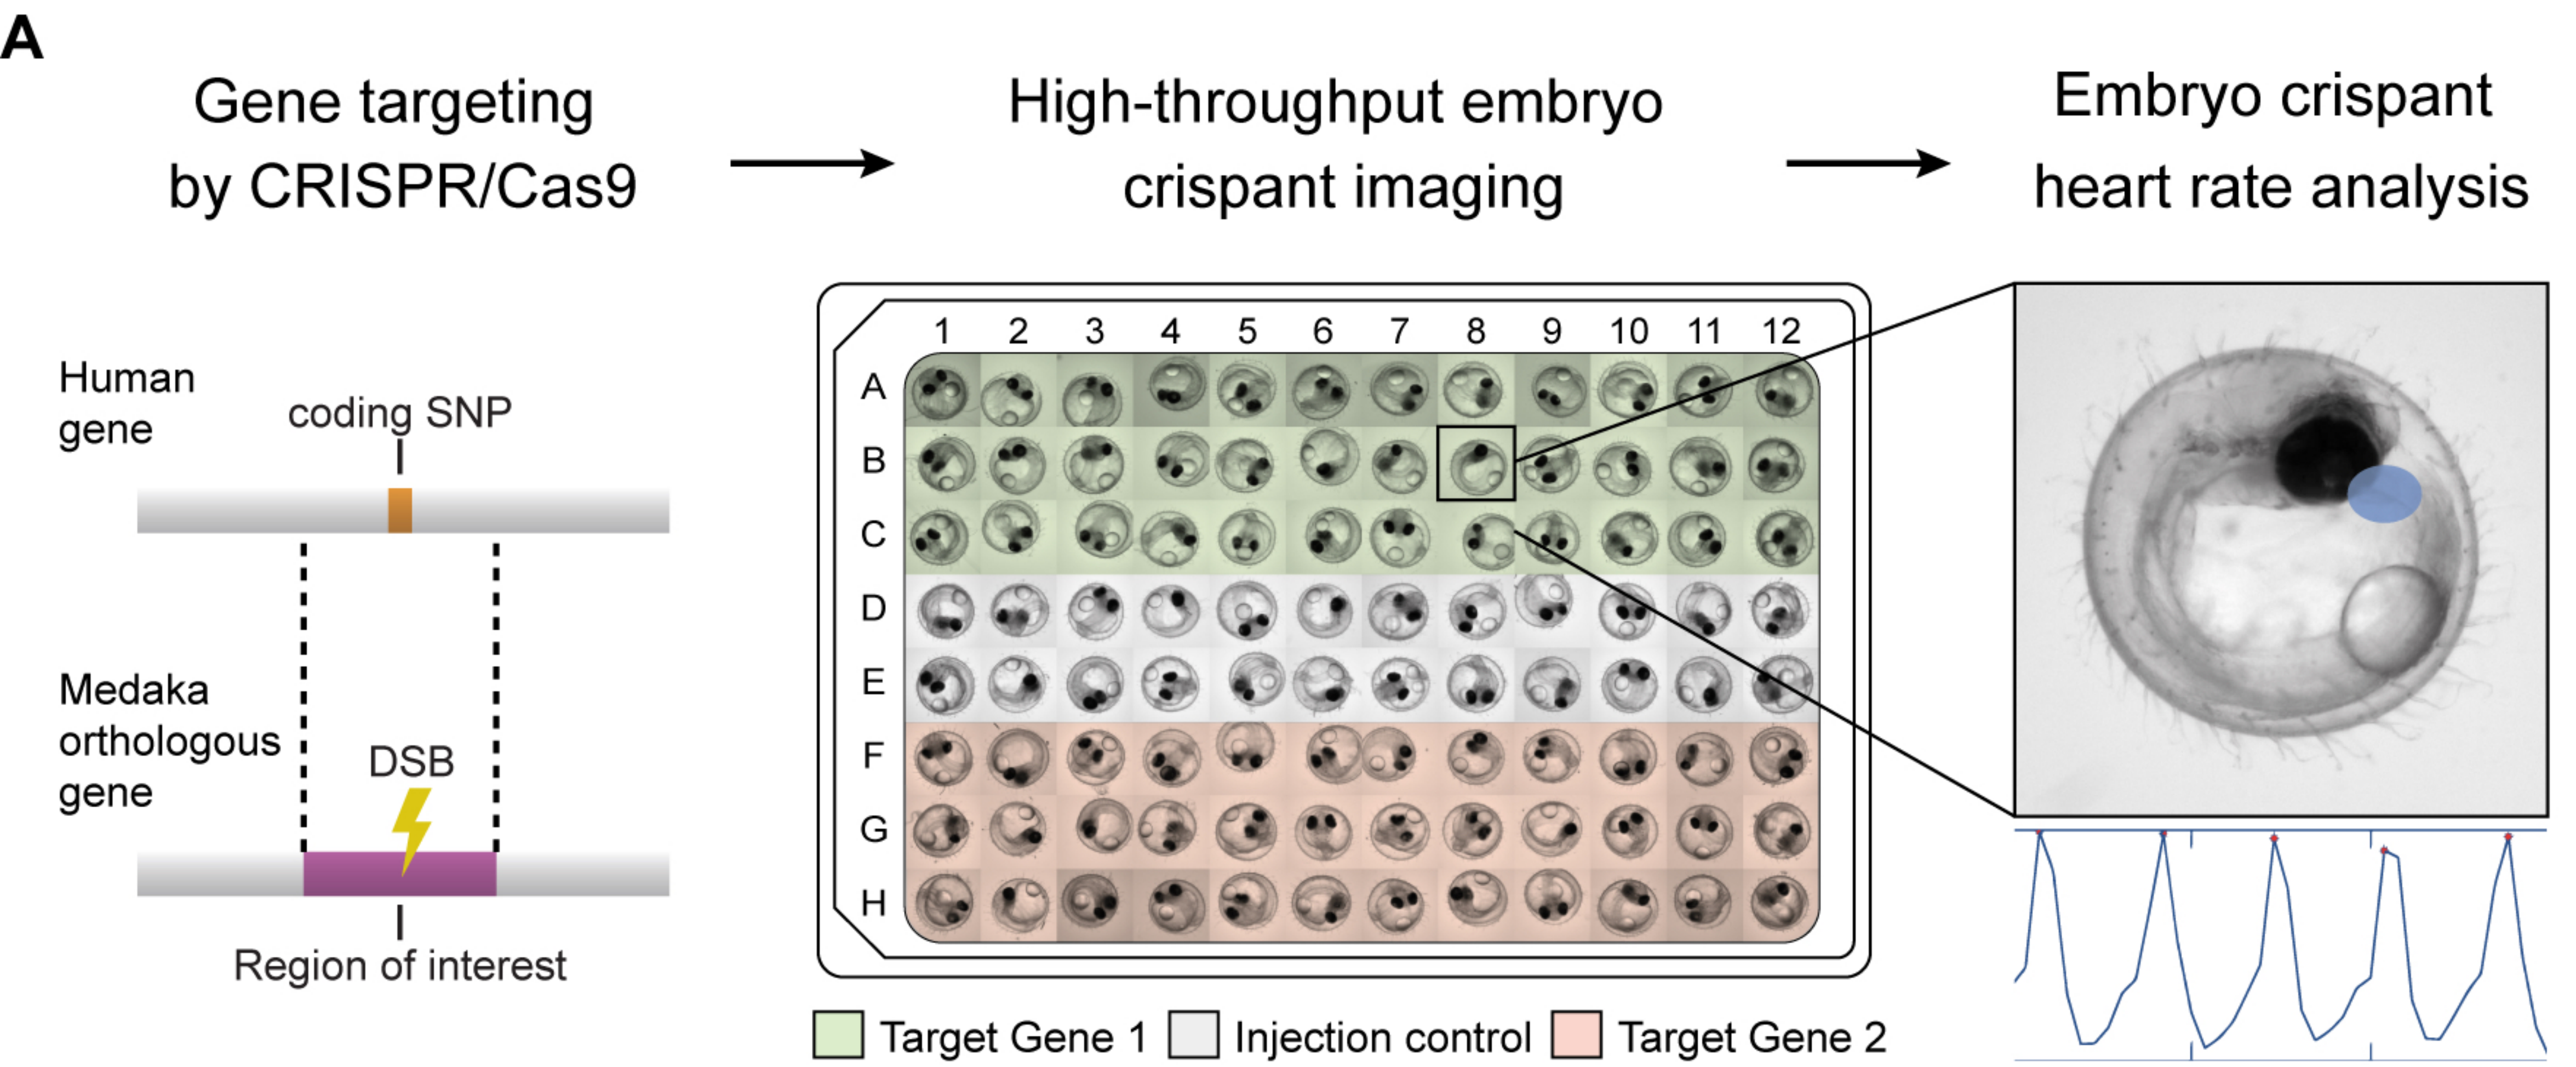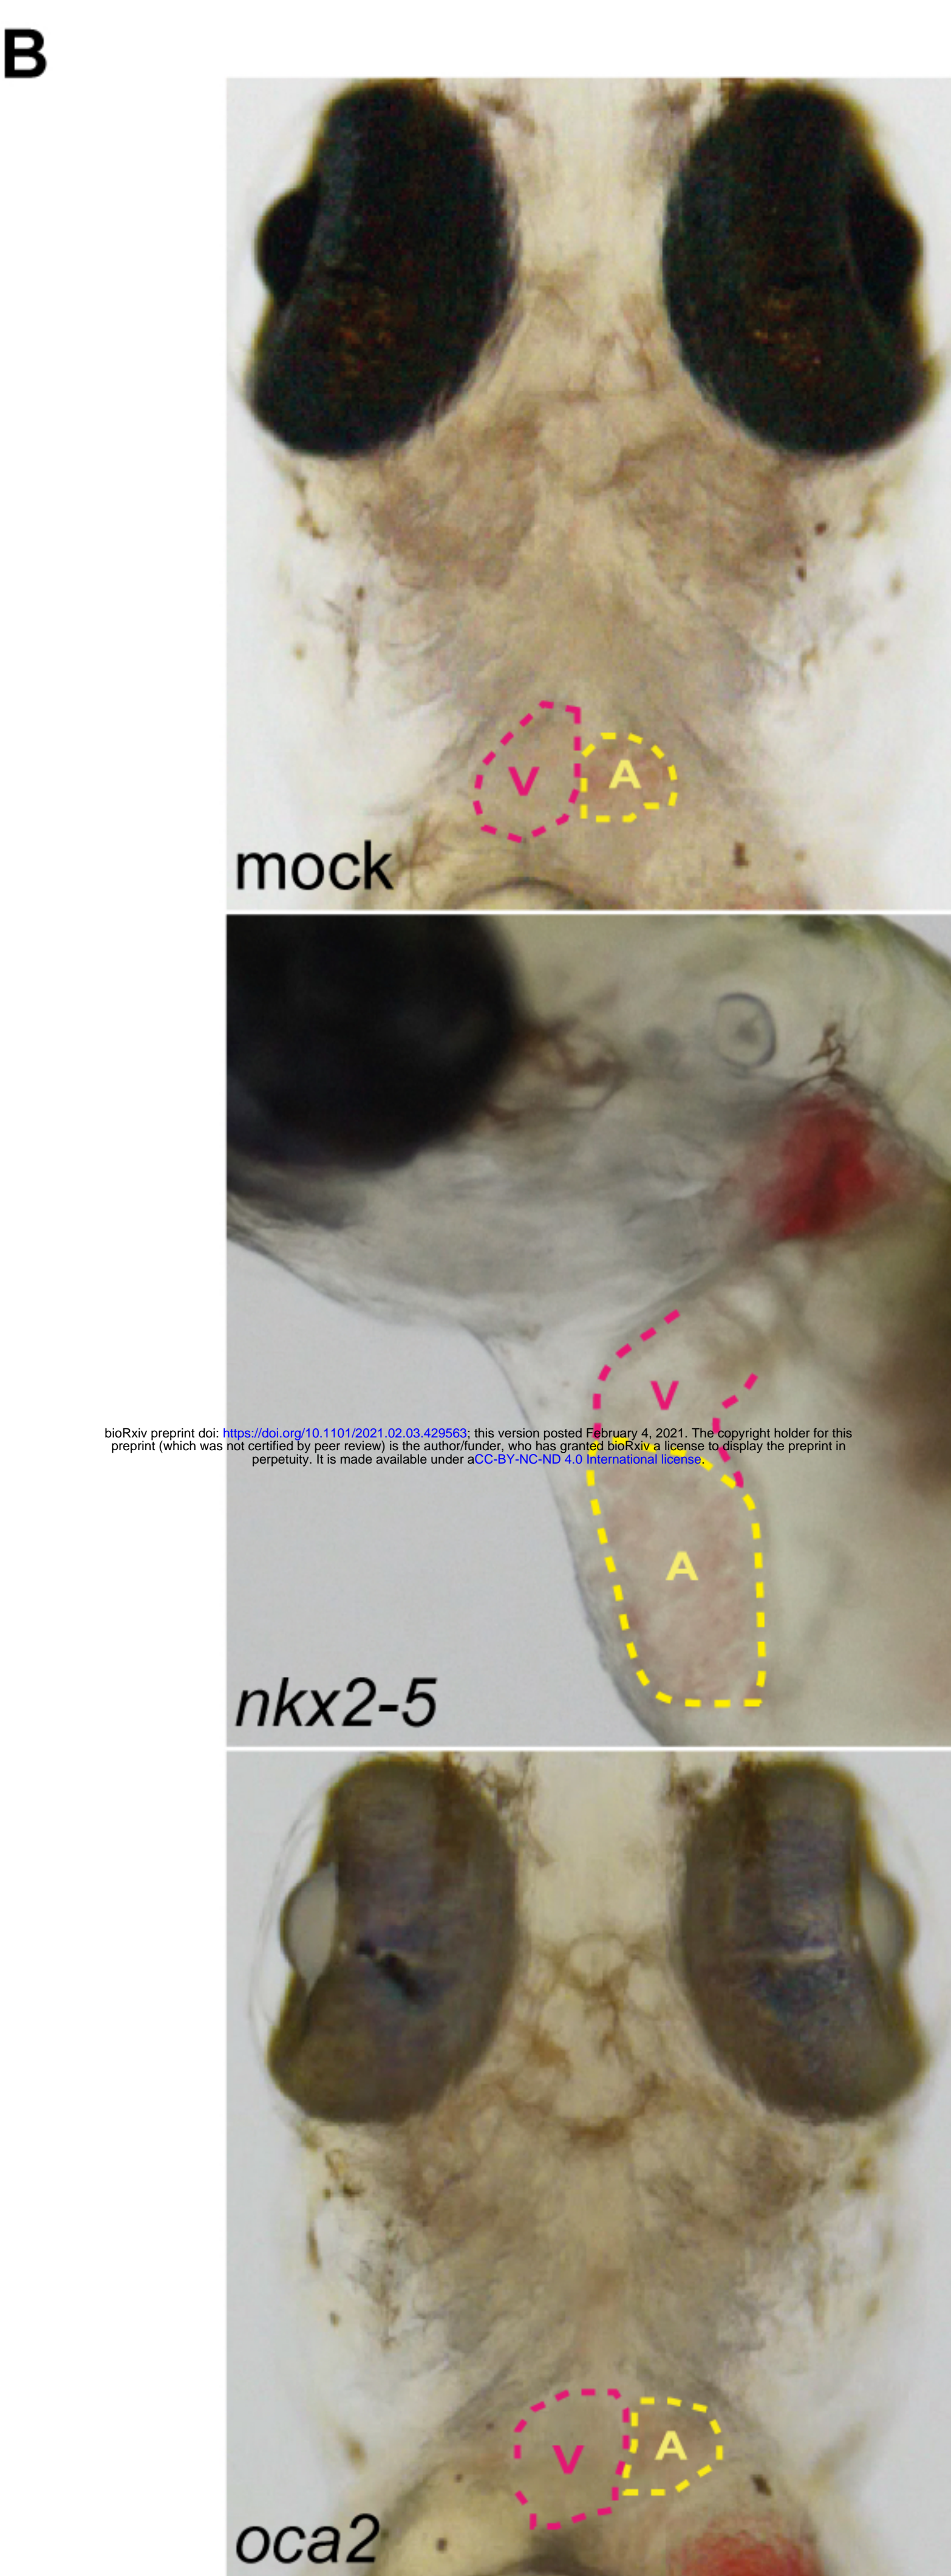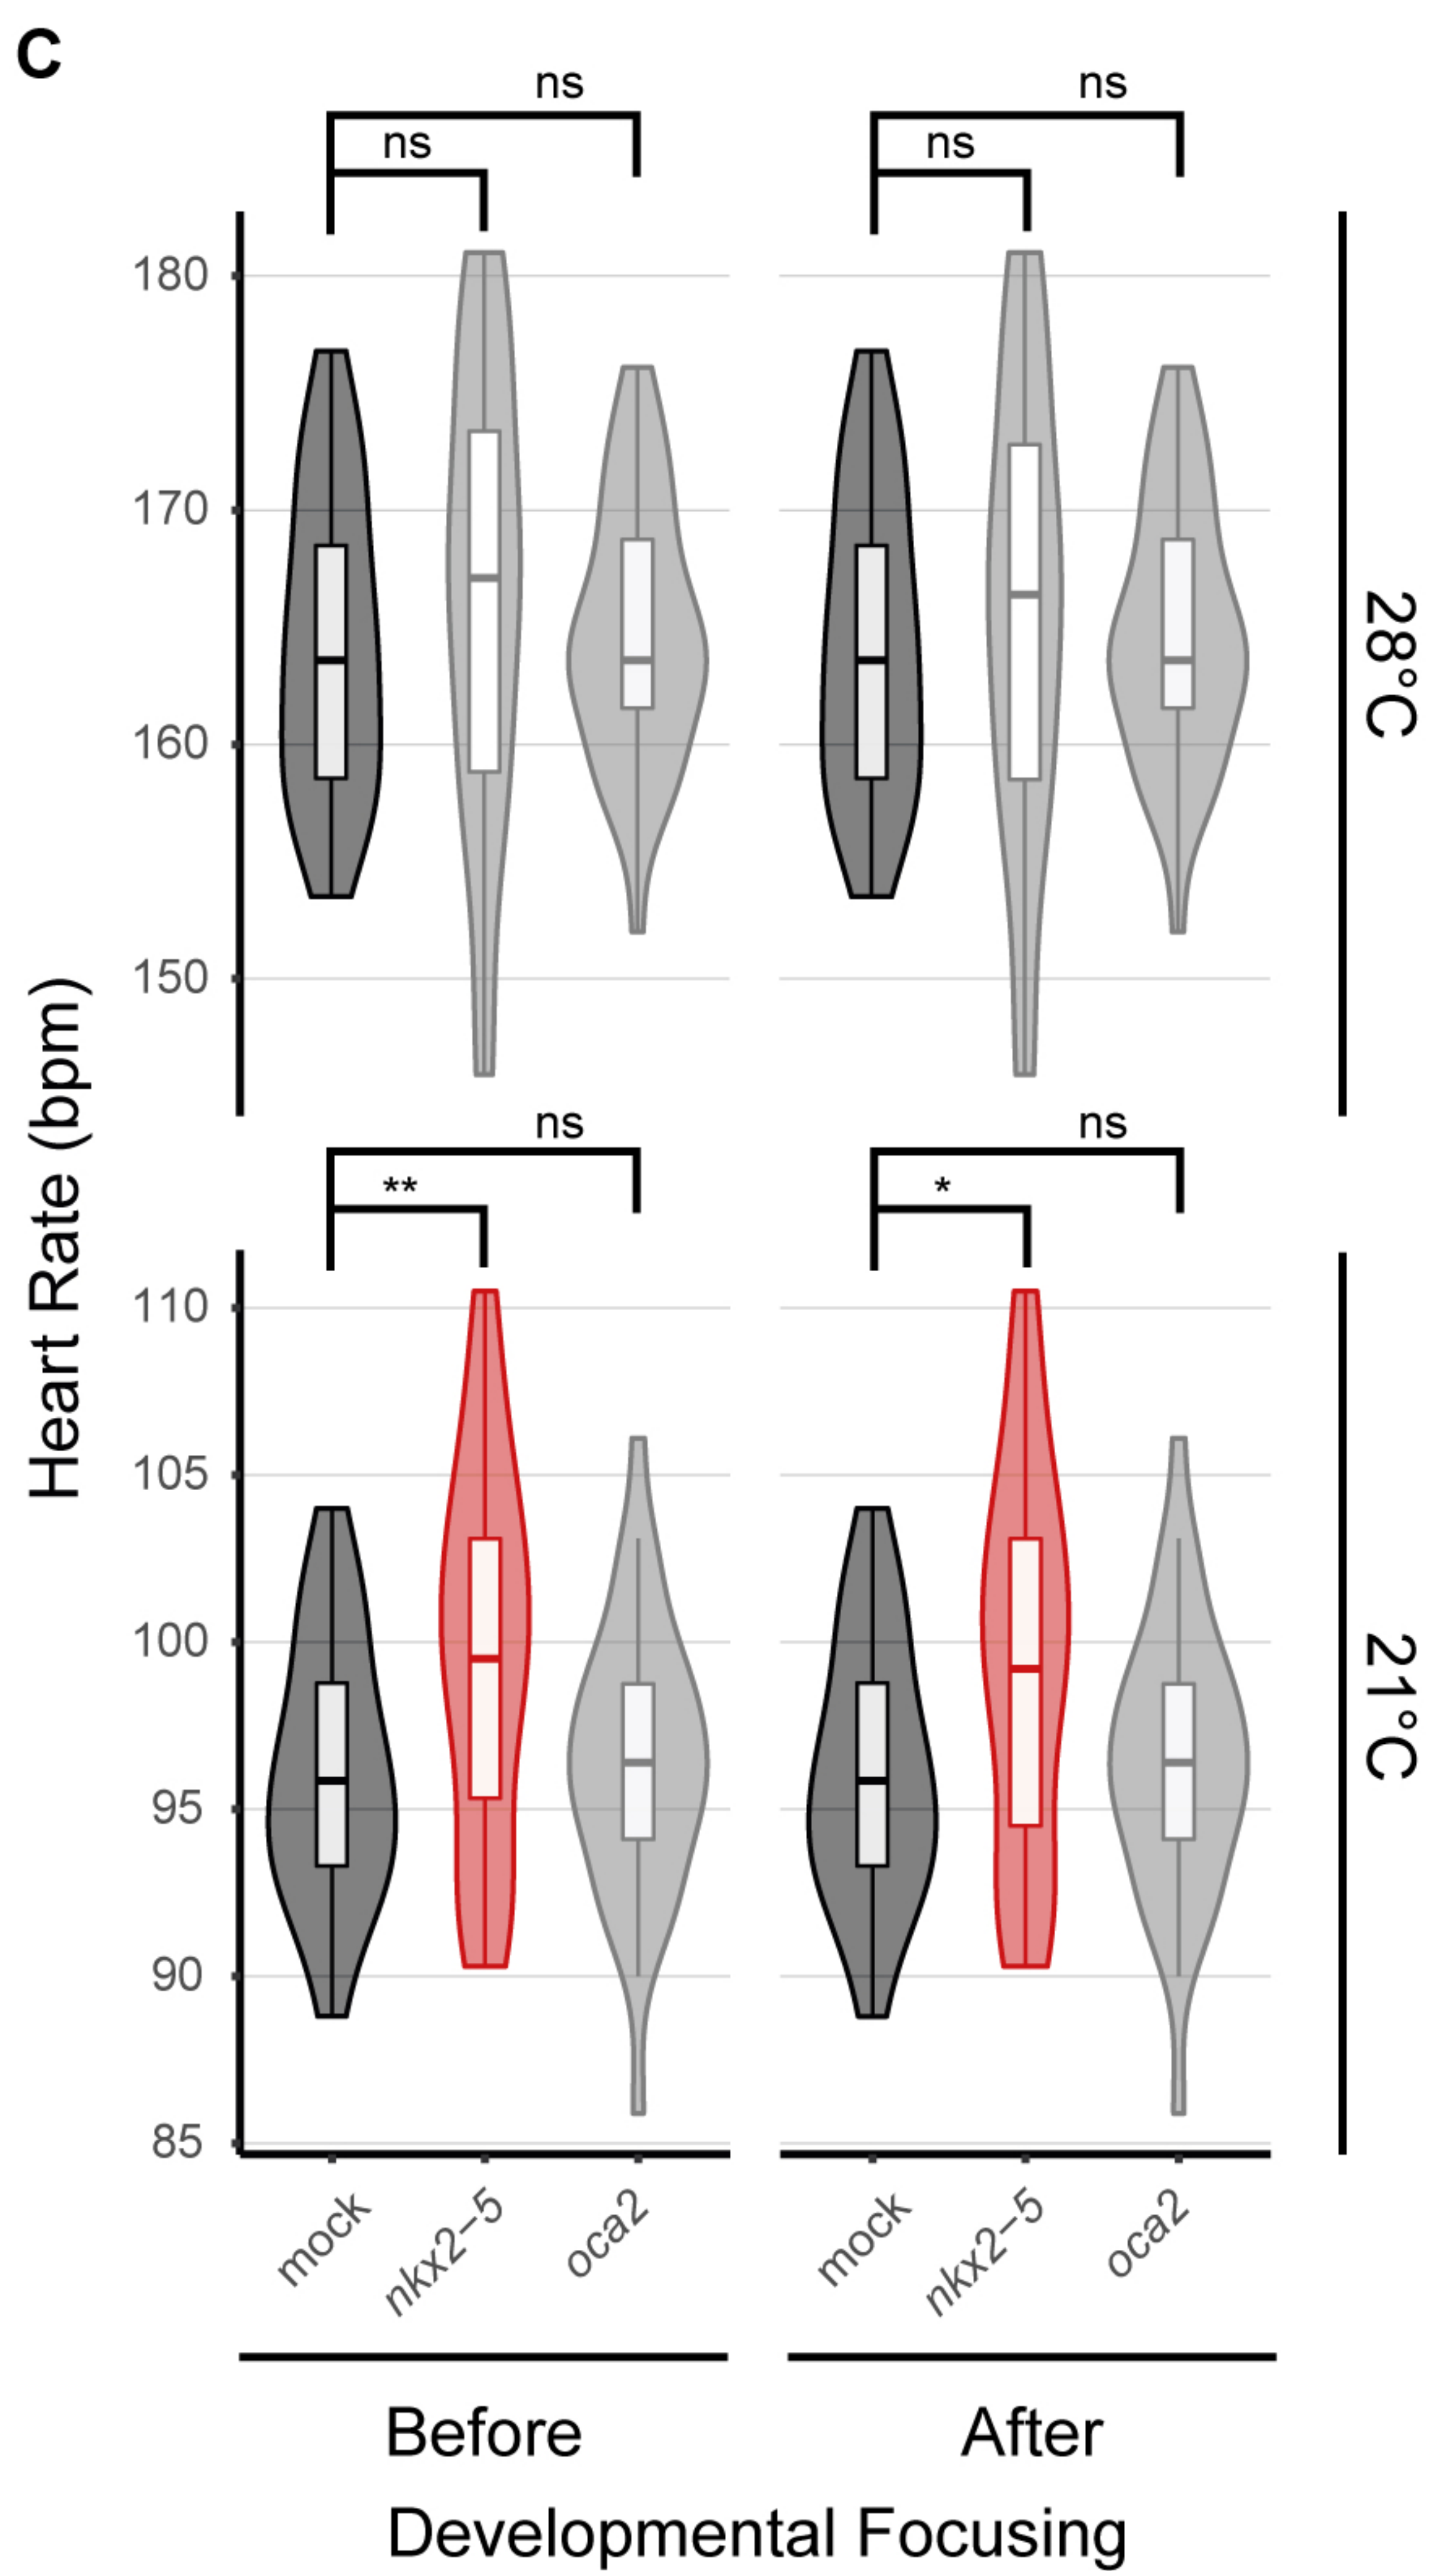

Hammouda et al. Figure 1



A

Heart Rate (bpm)

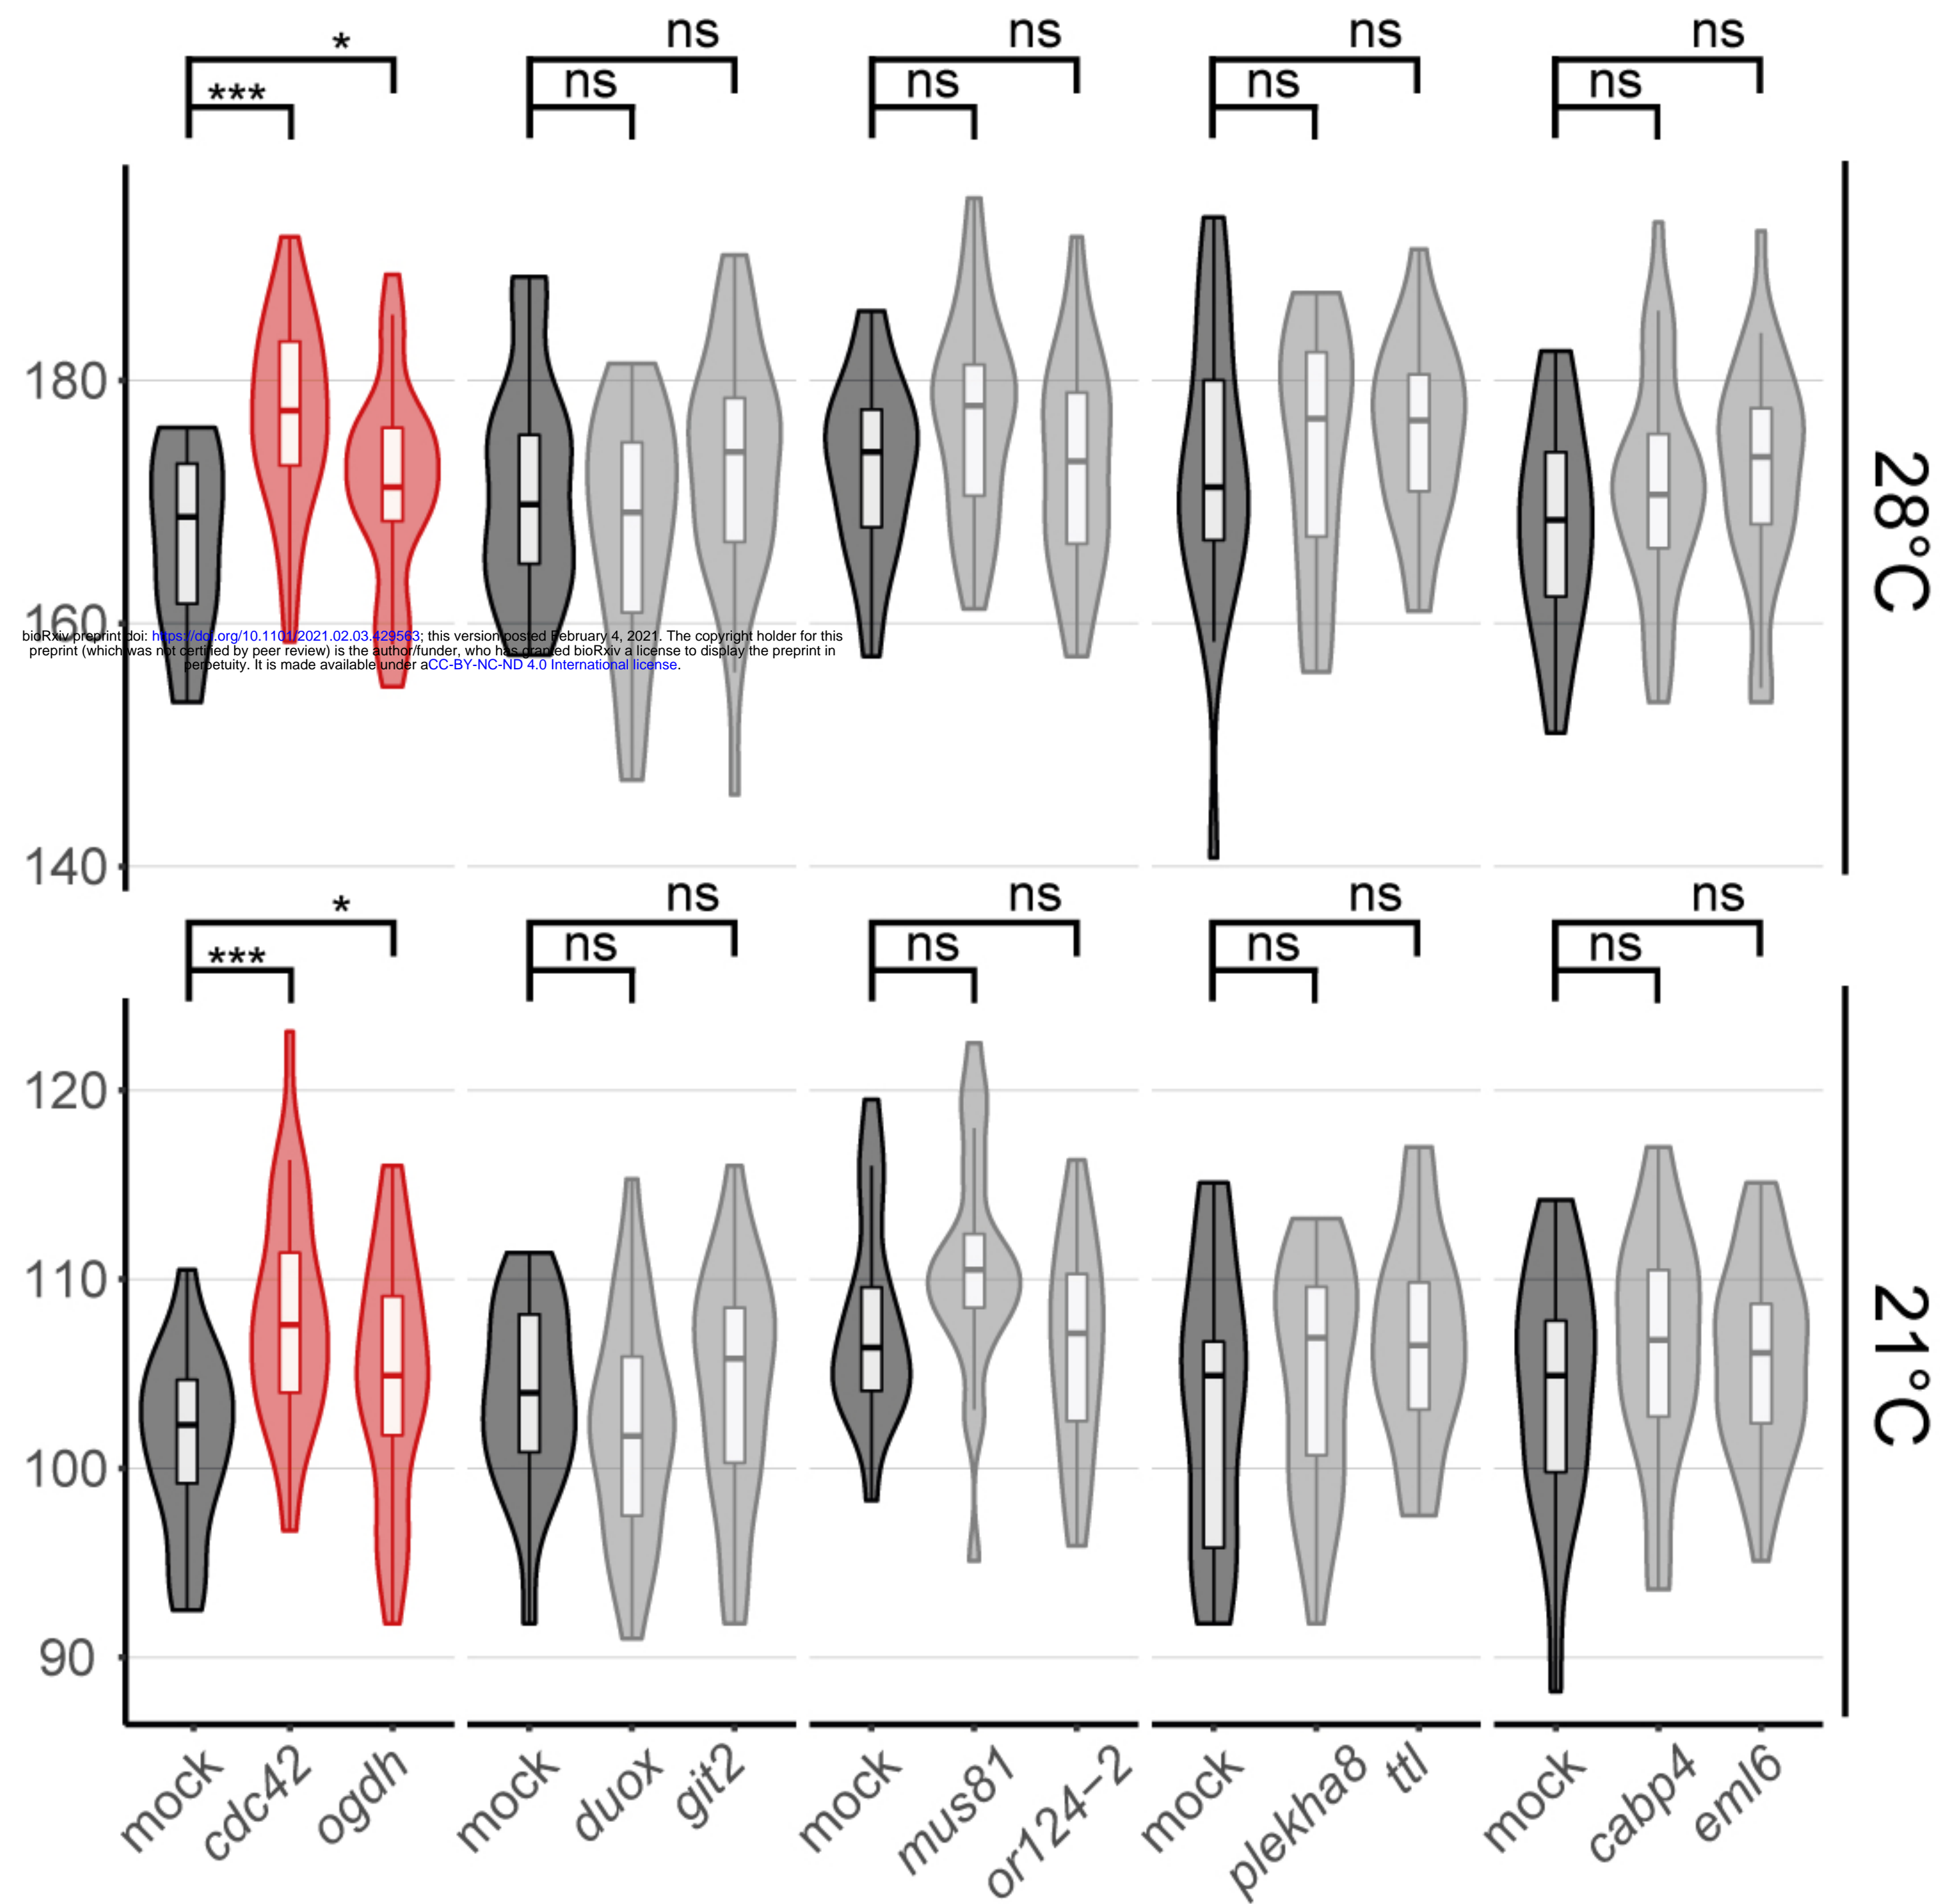

B

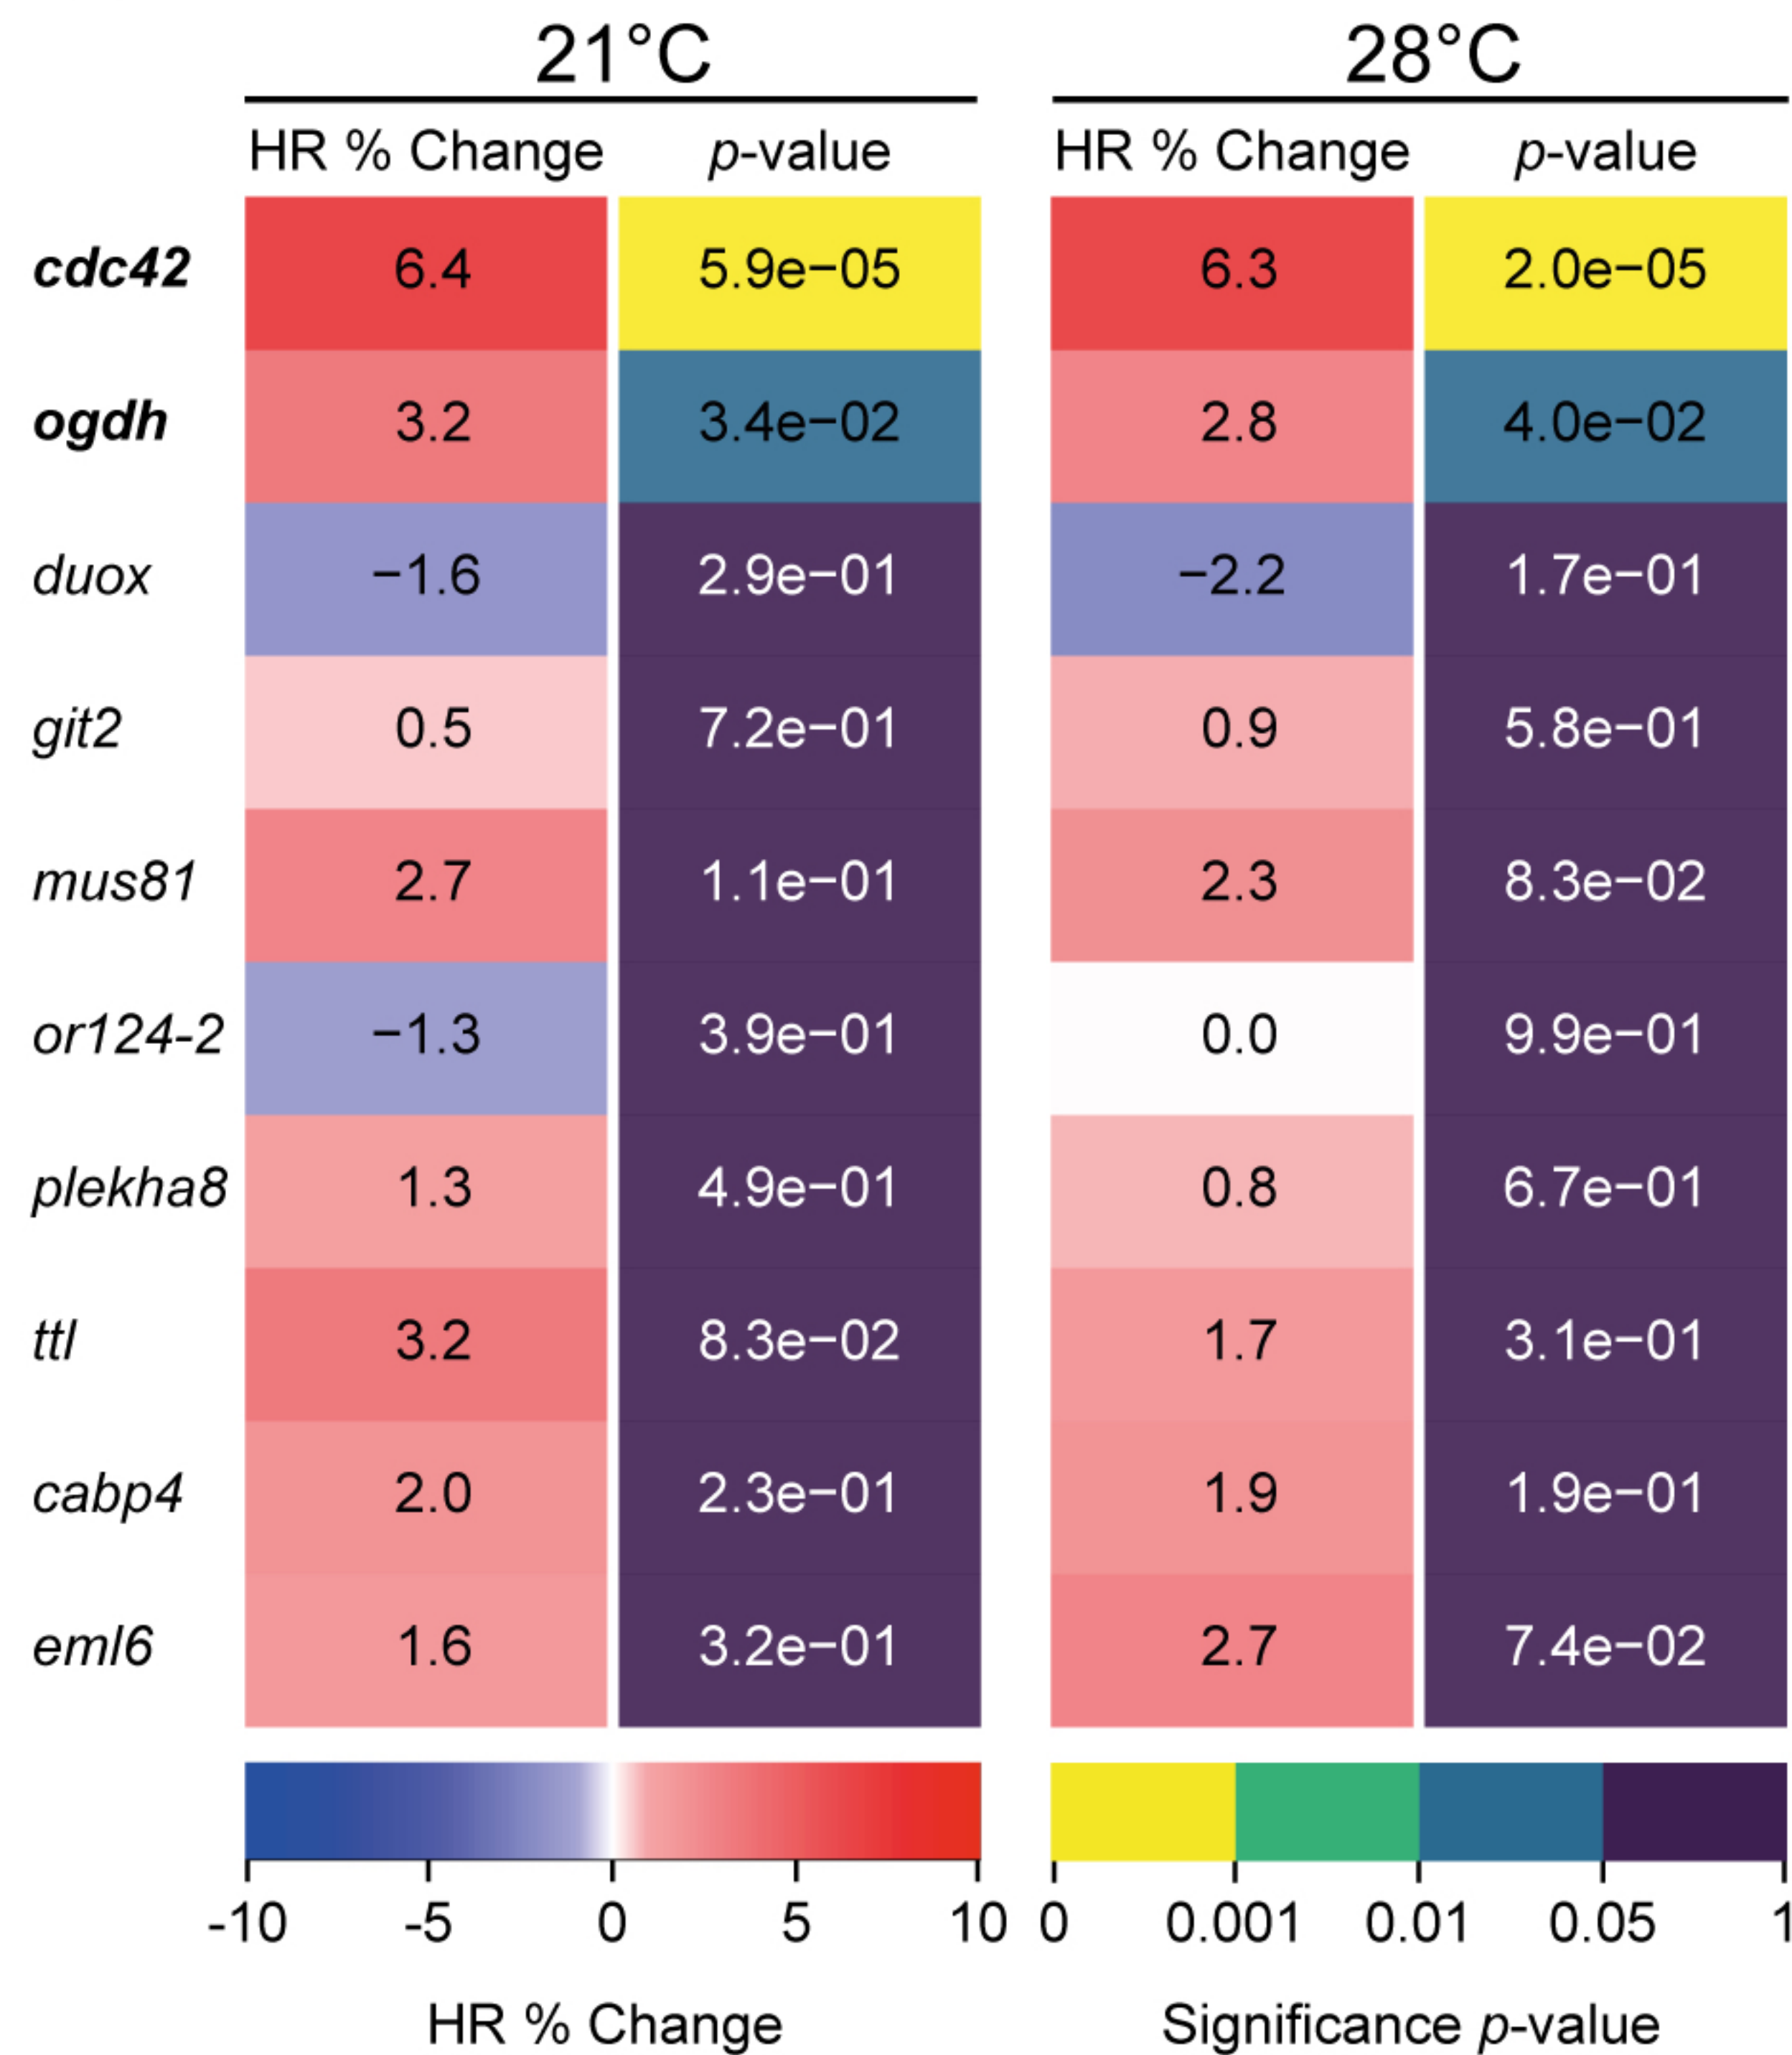

Hammouda et al. Figure 2



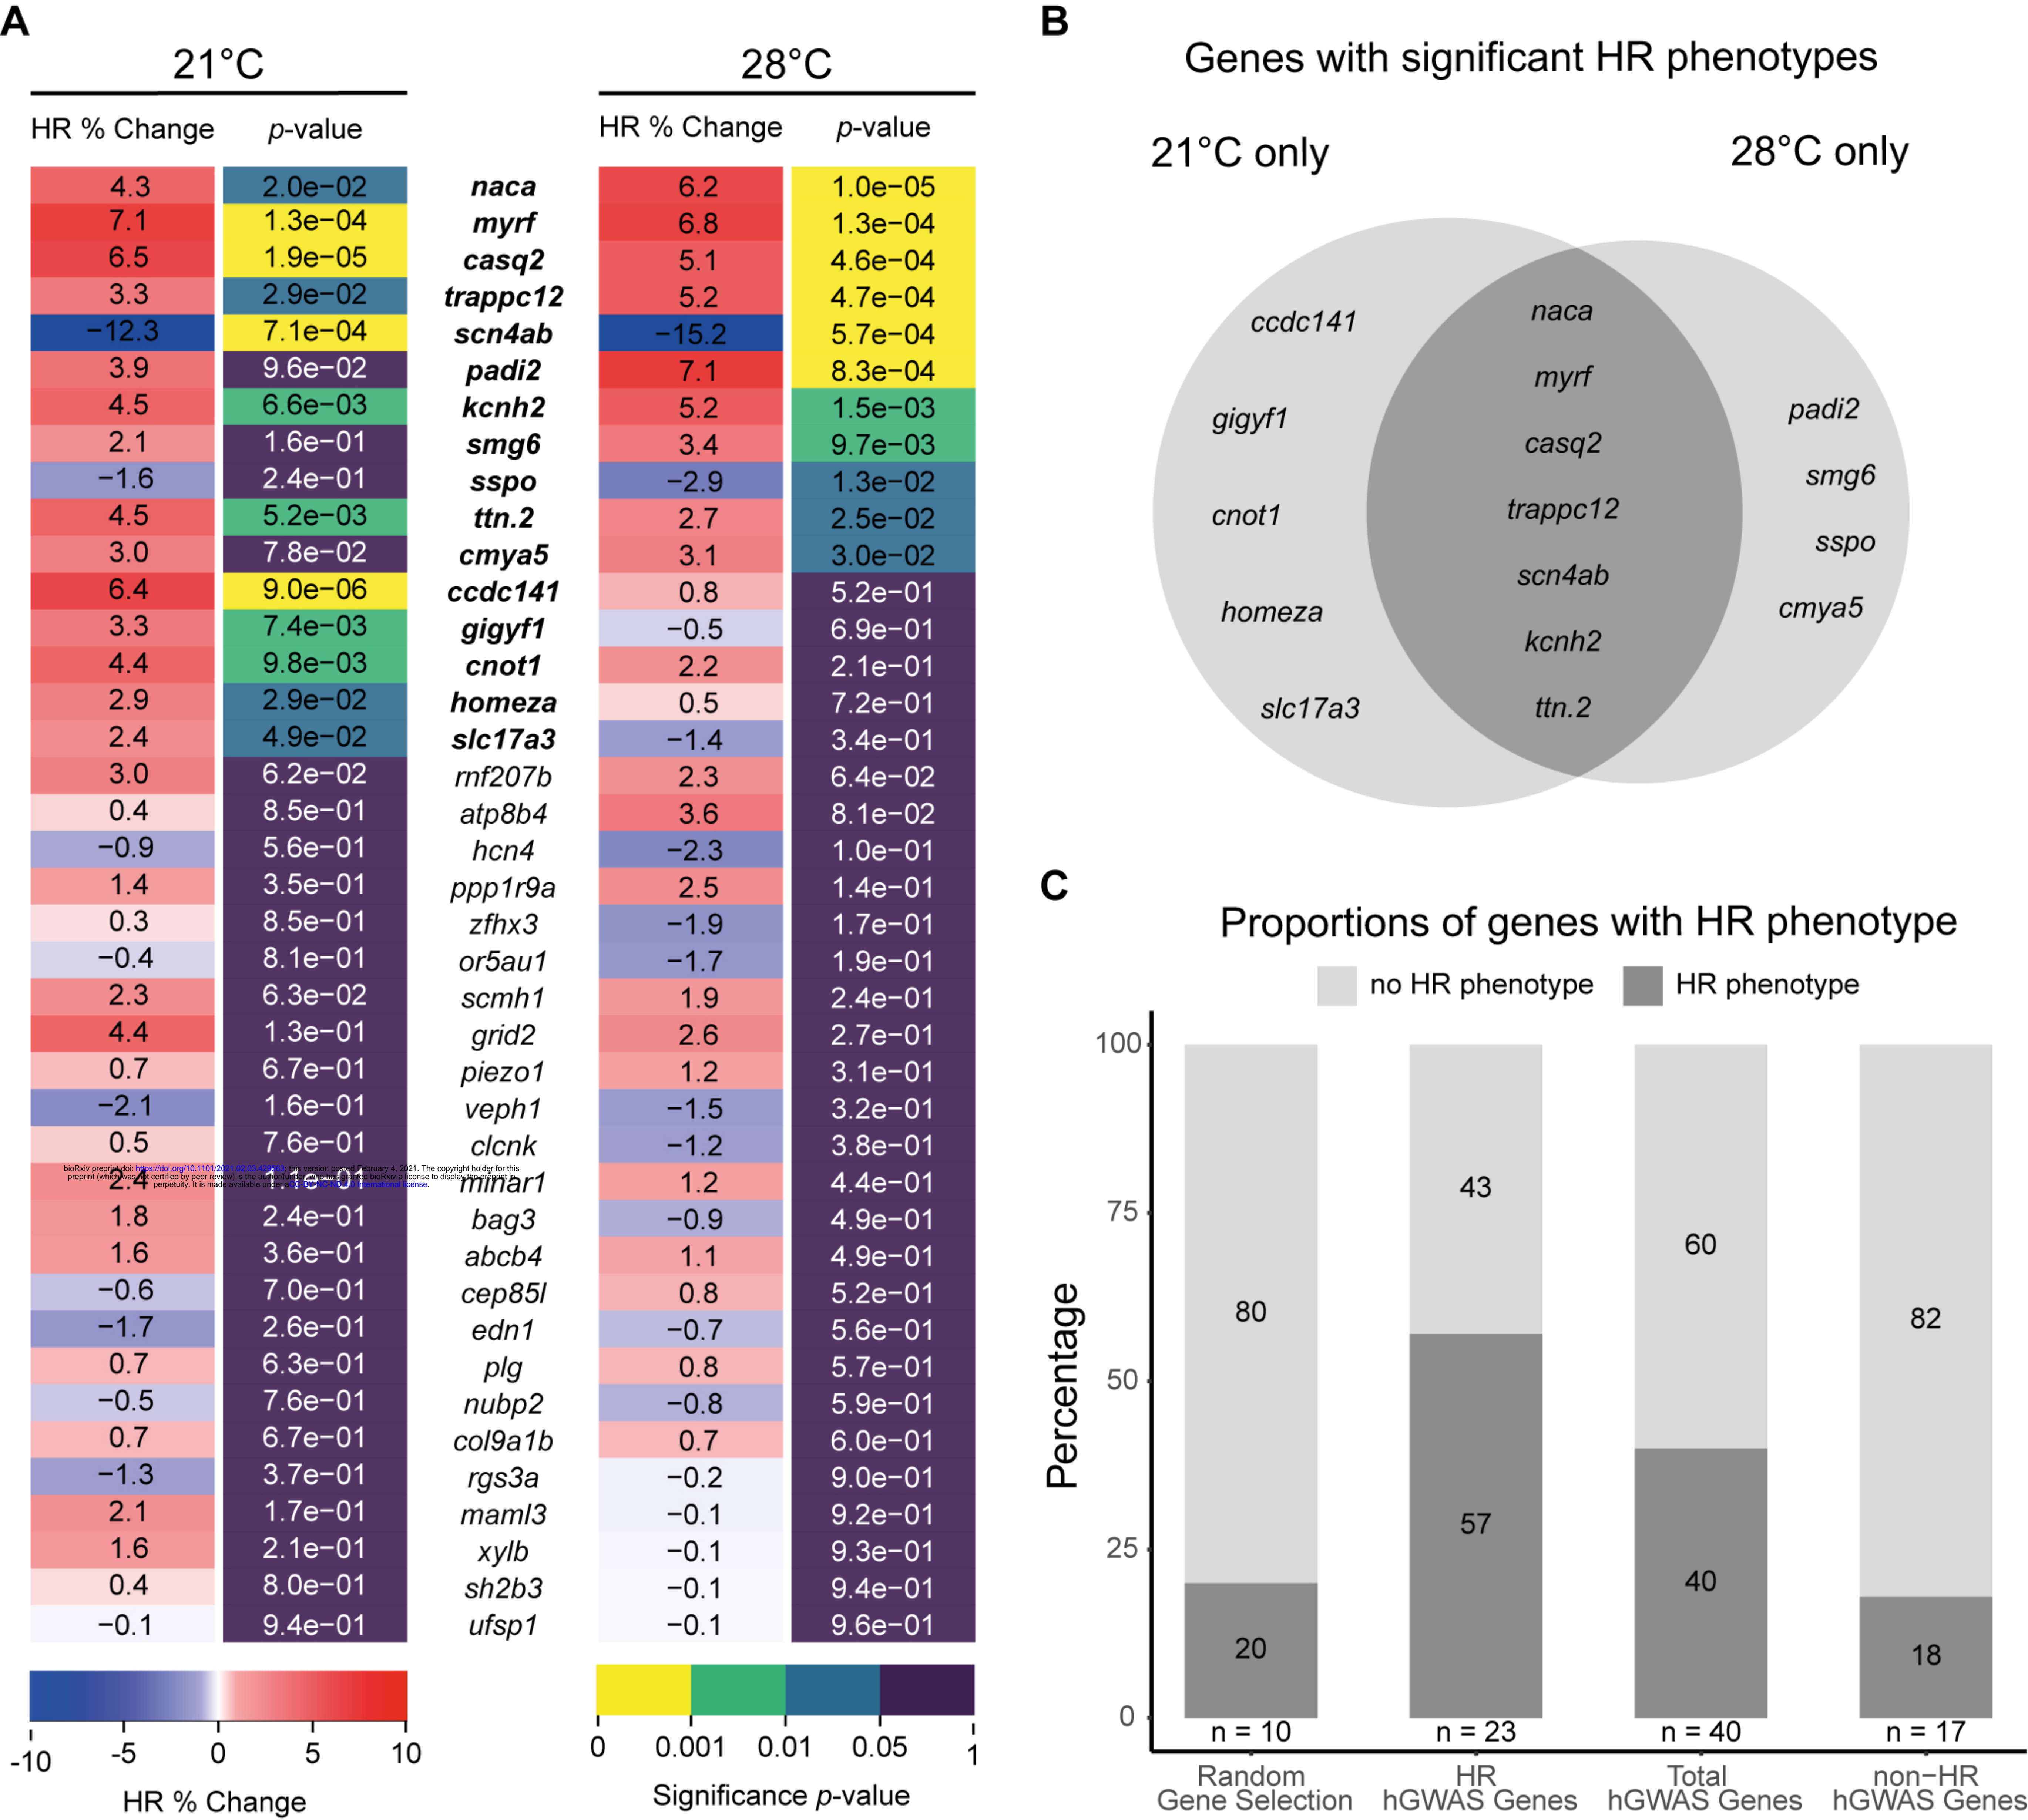



**A**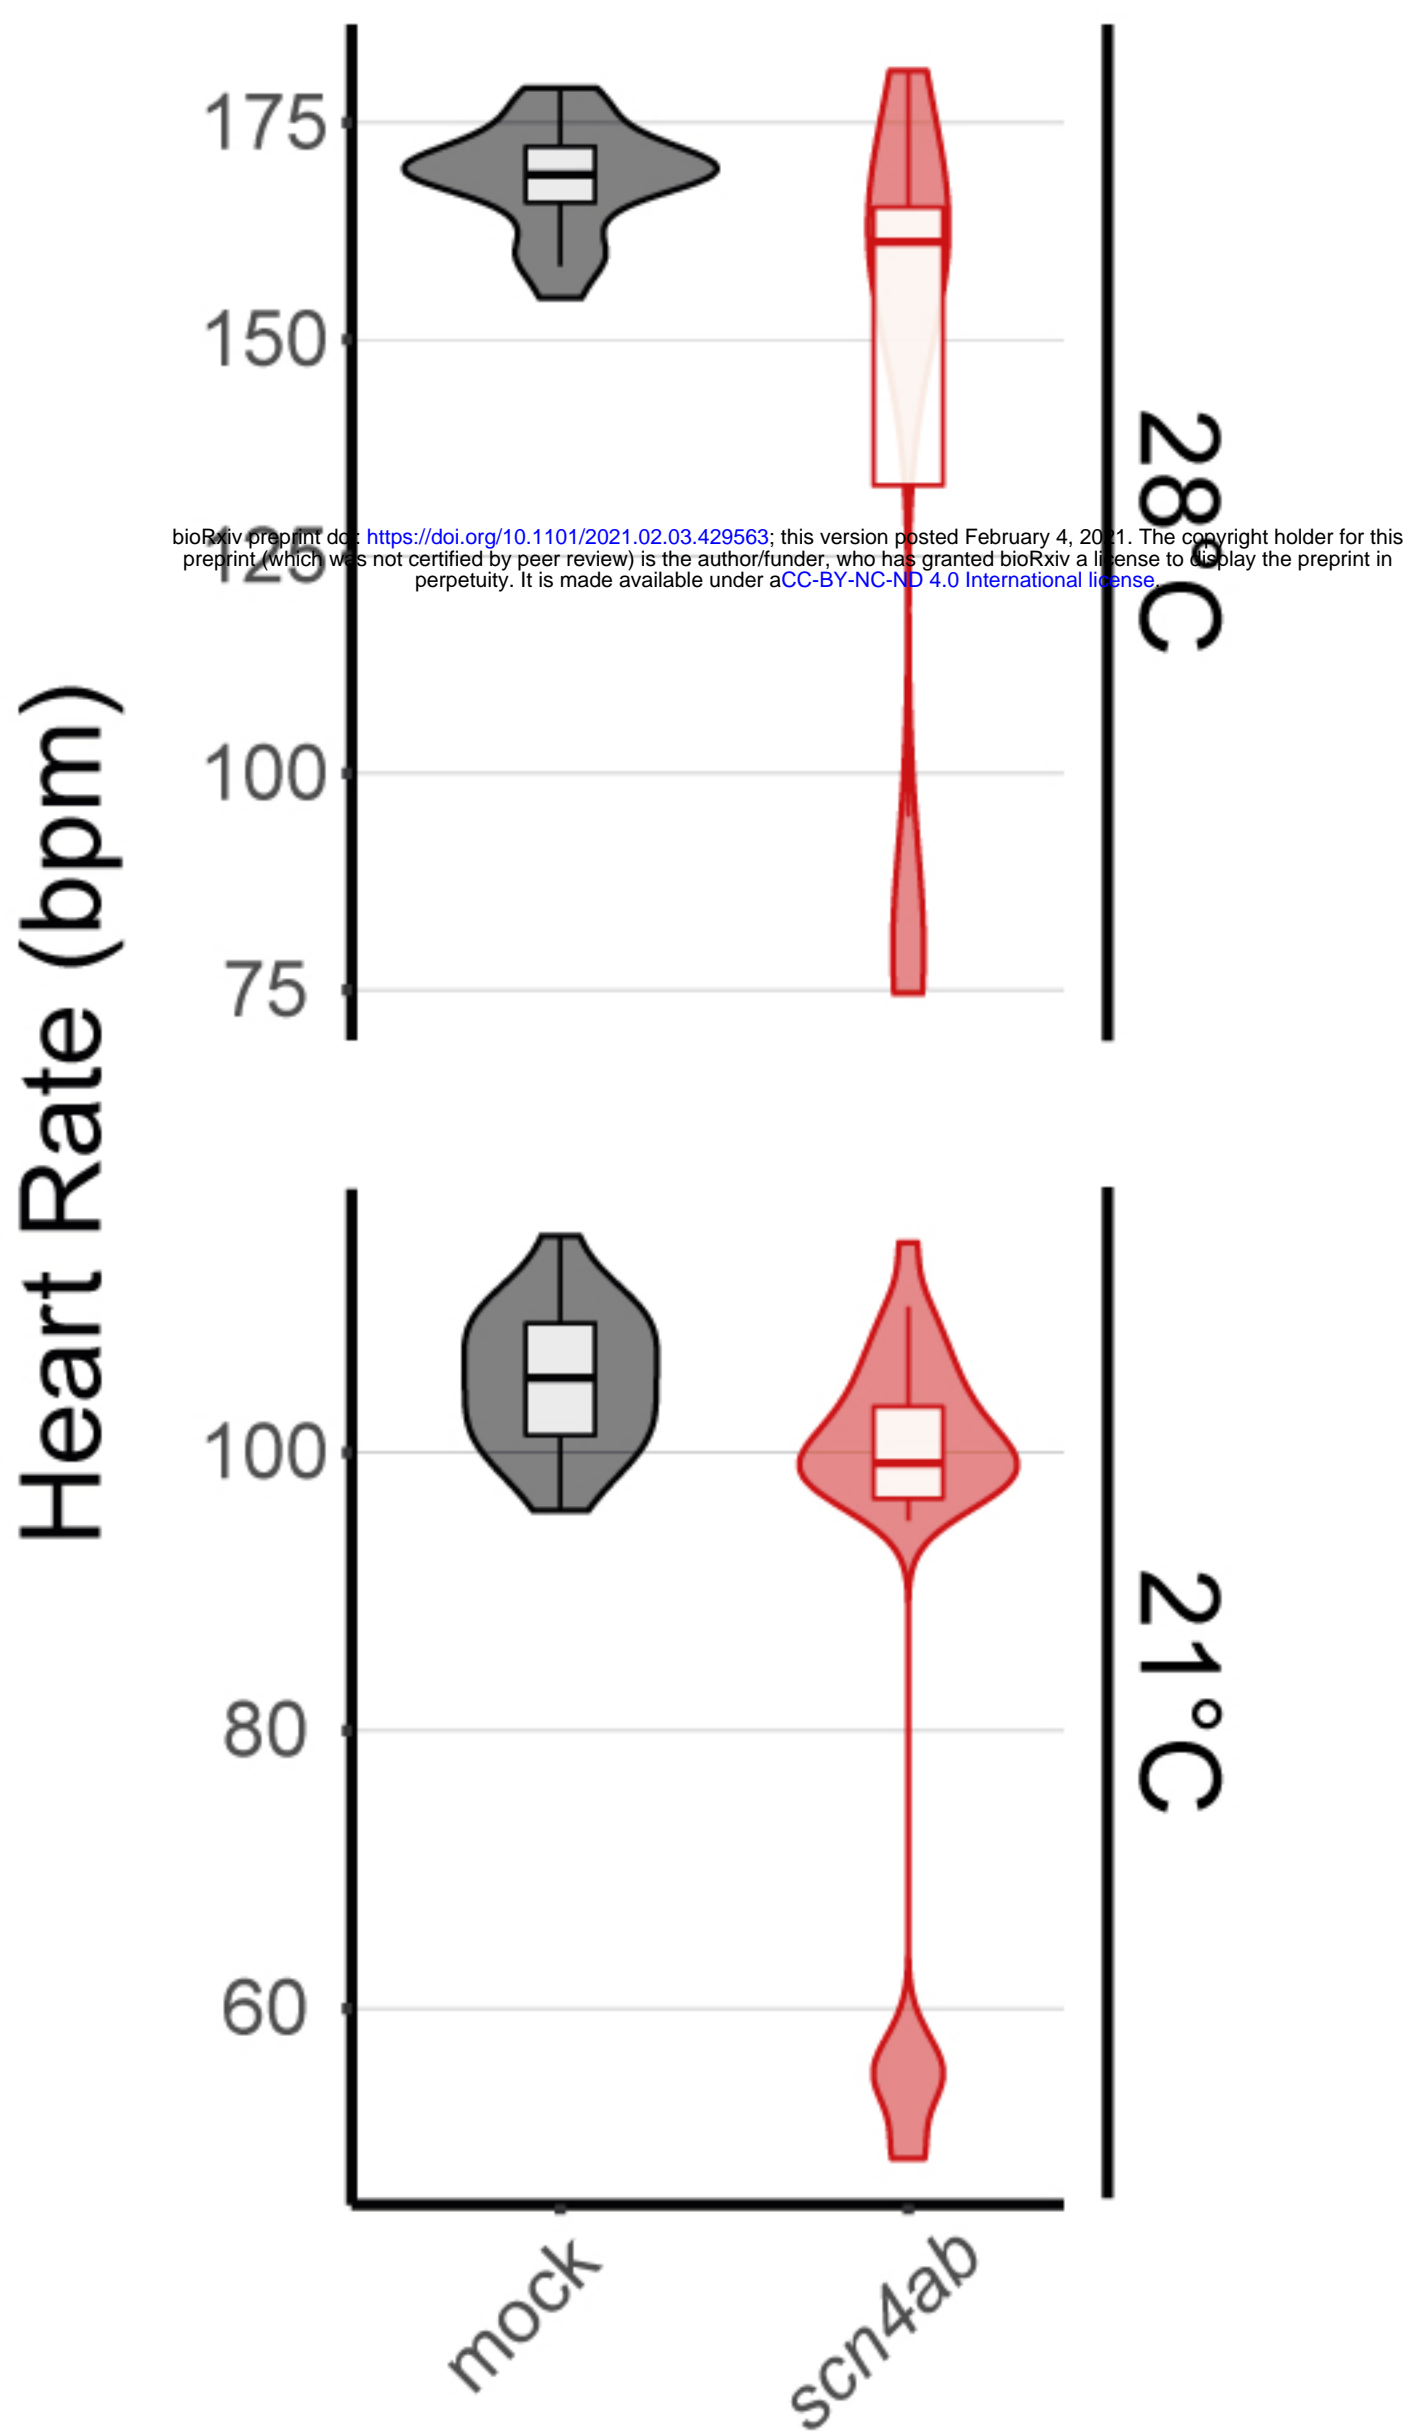**B**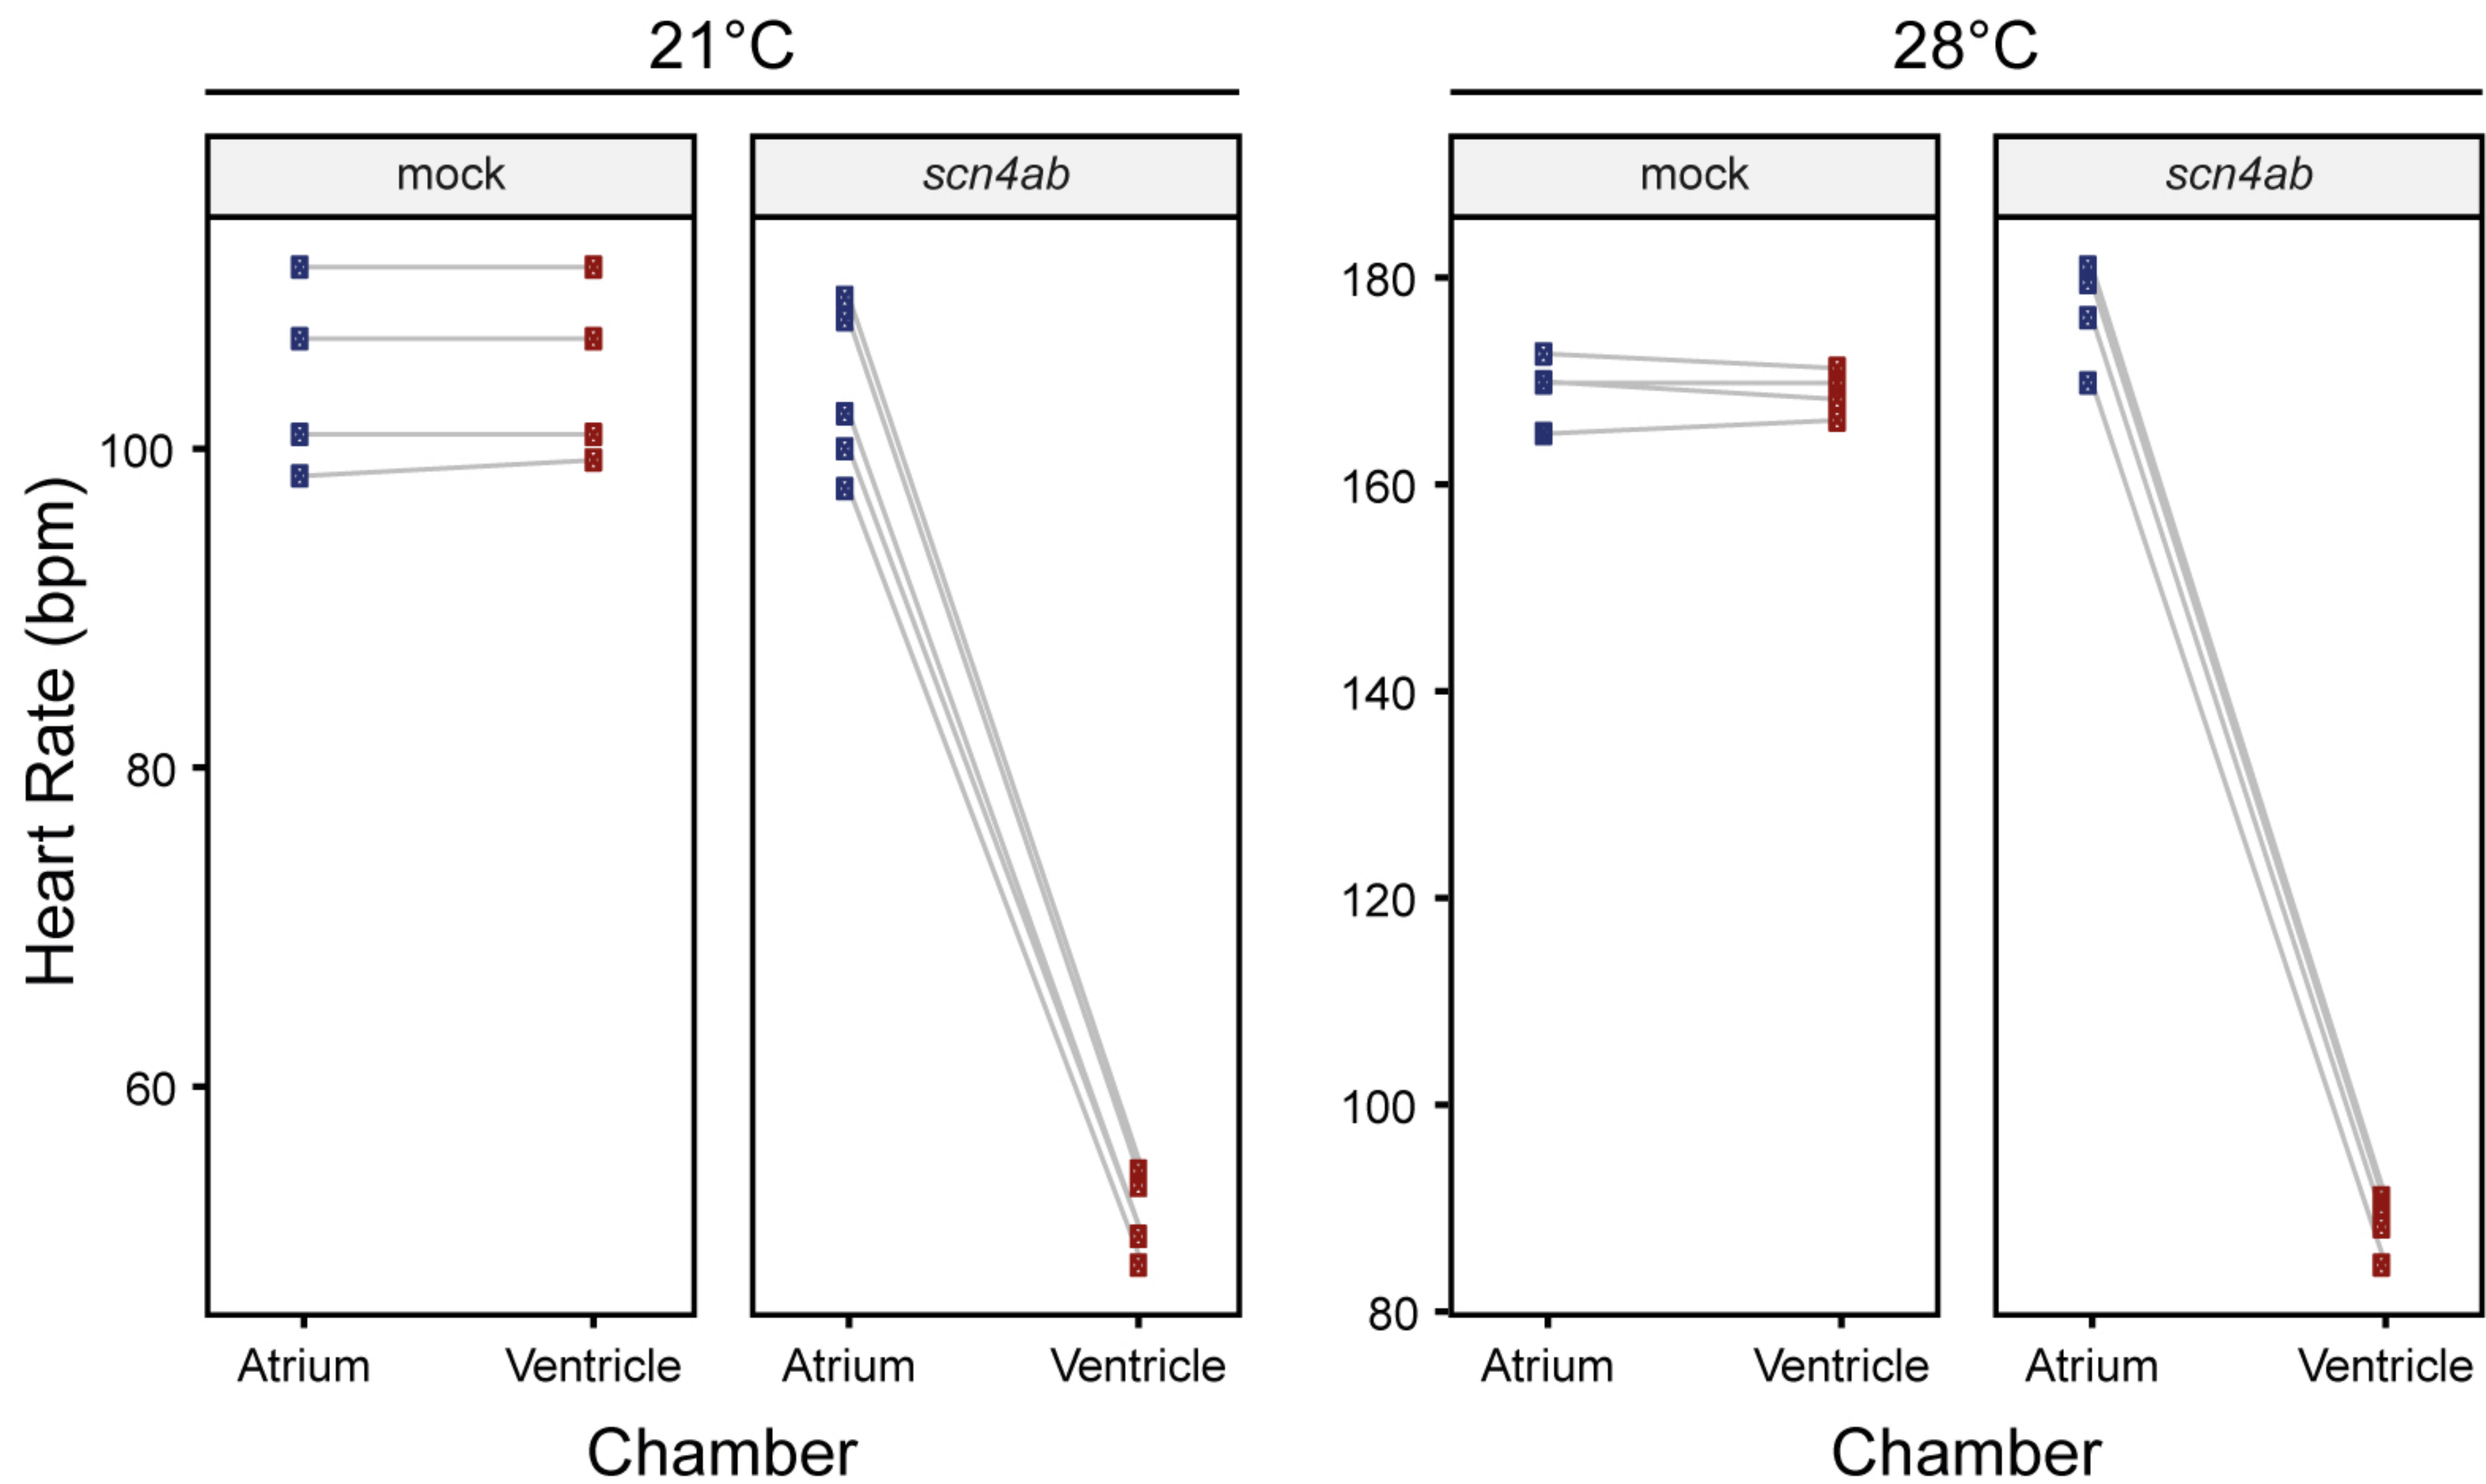

Hammouda et al. Figure 4



**A**

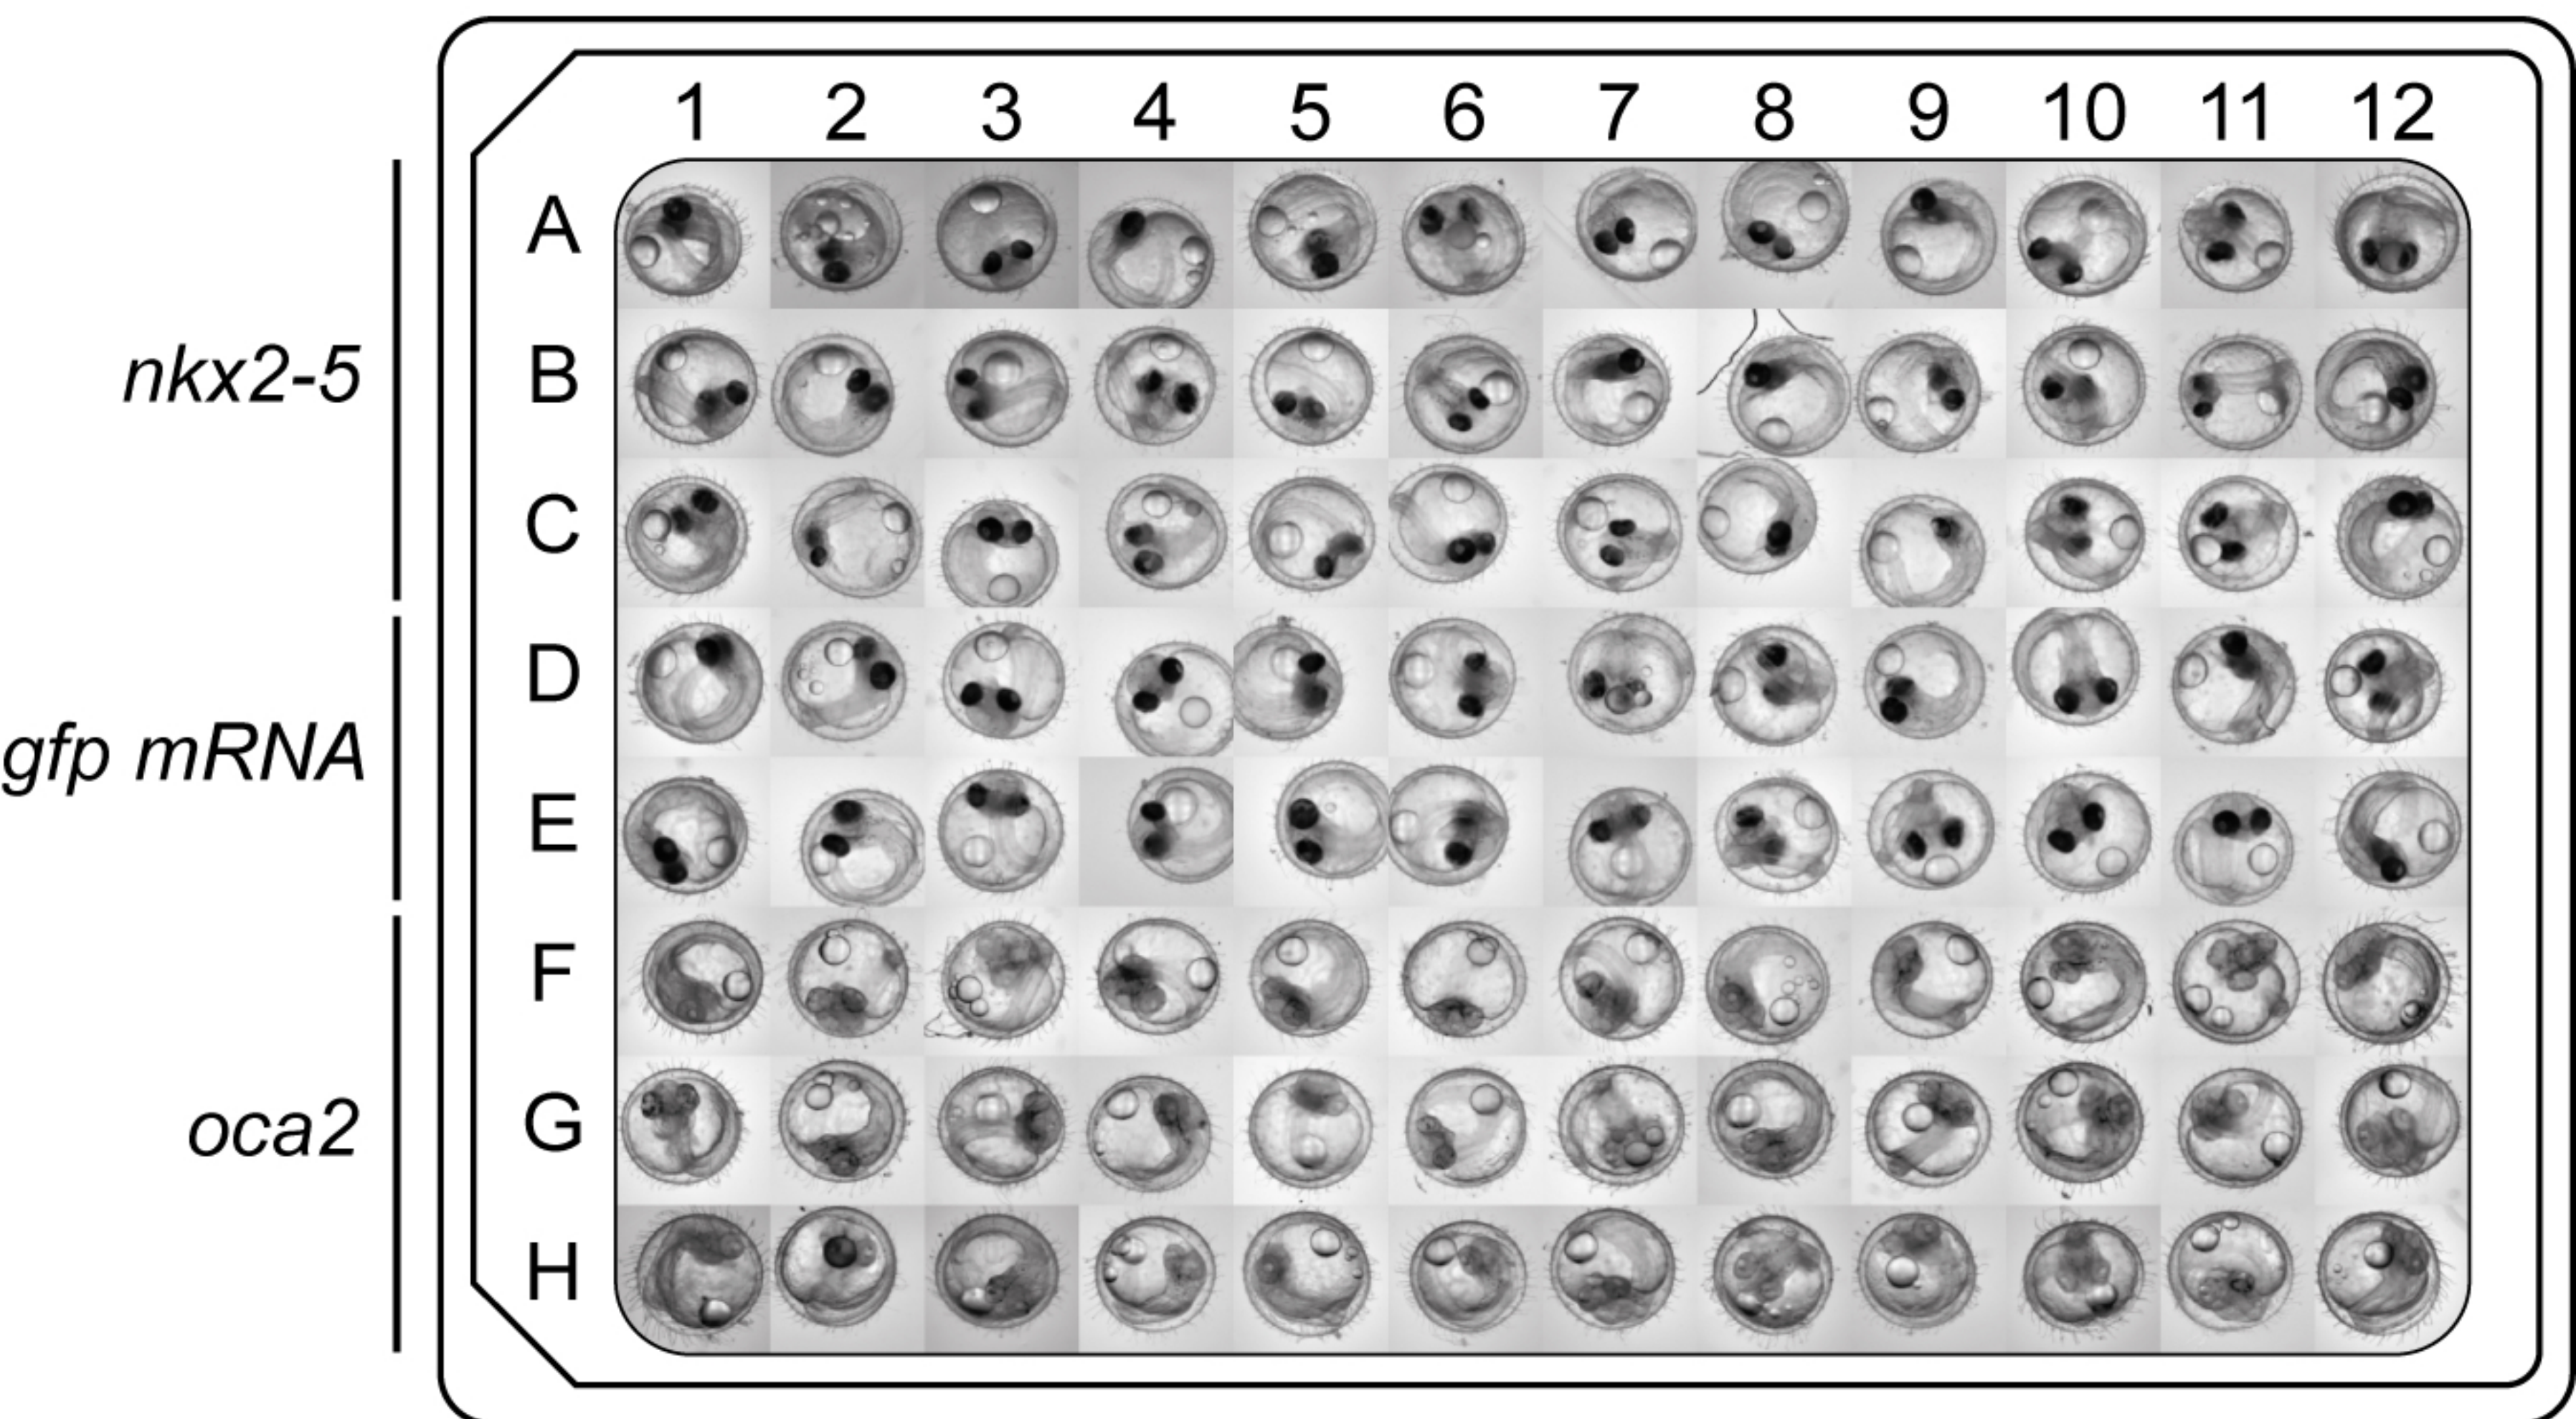

**B**

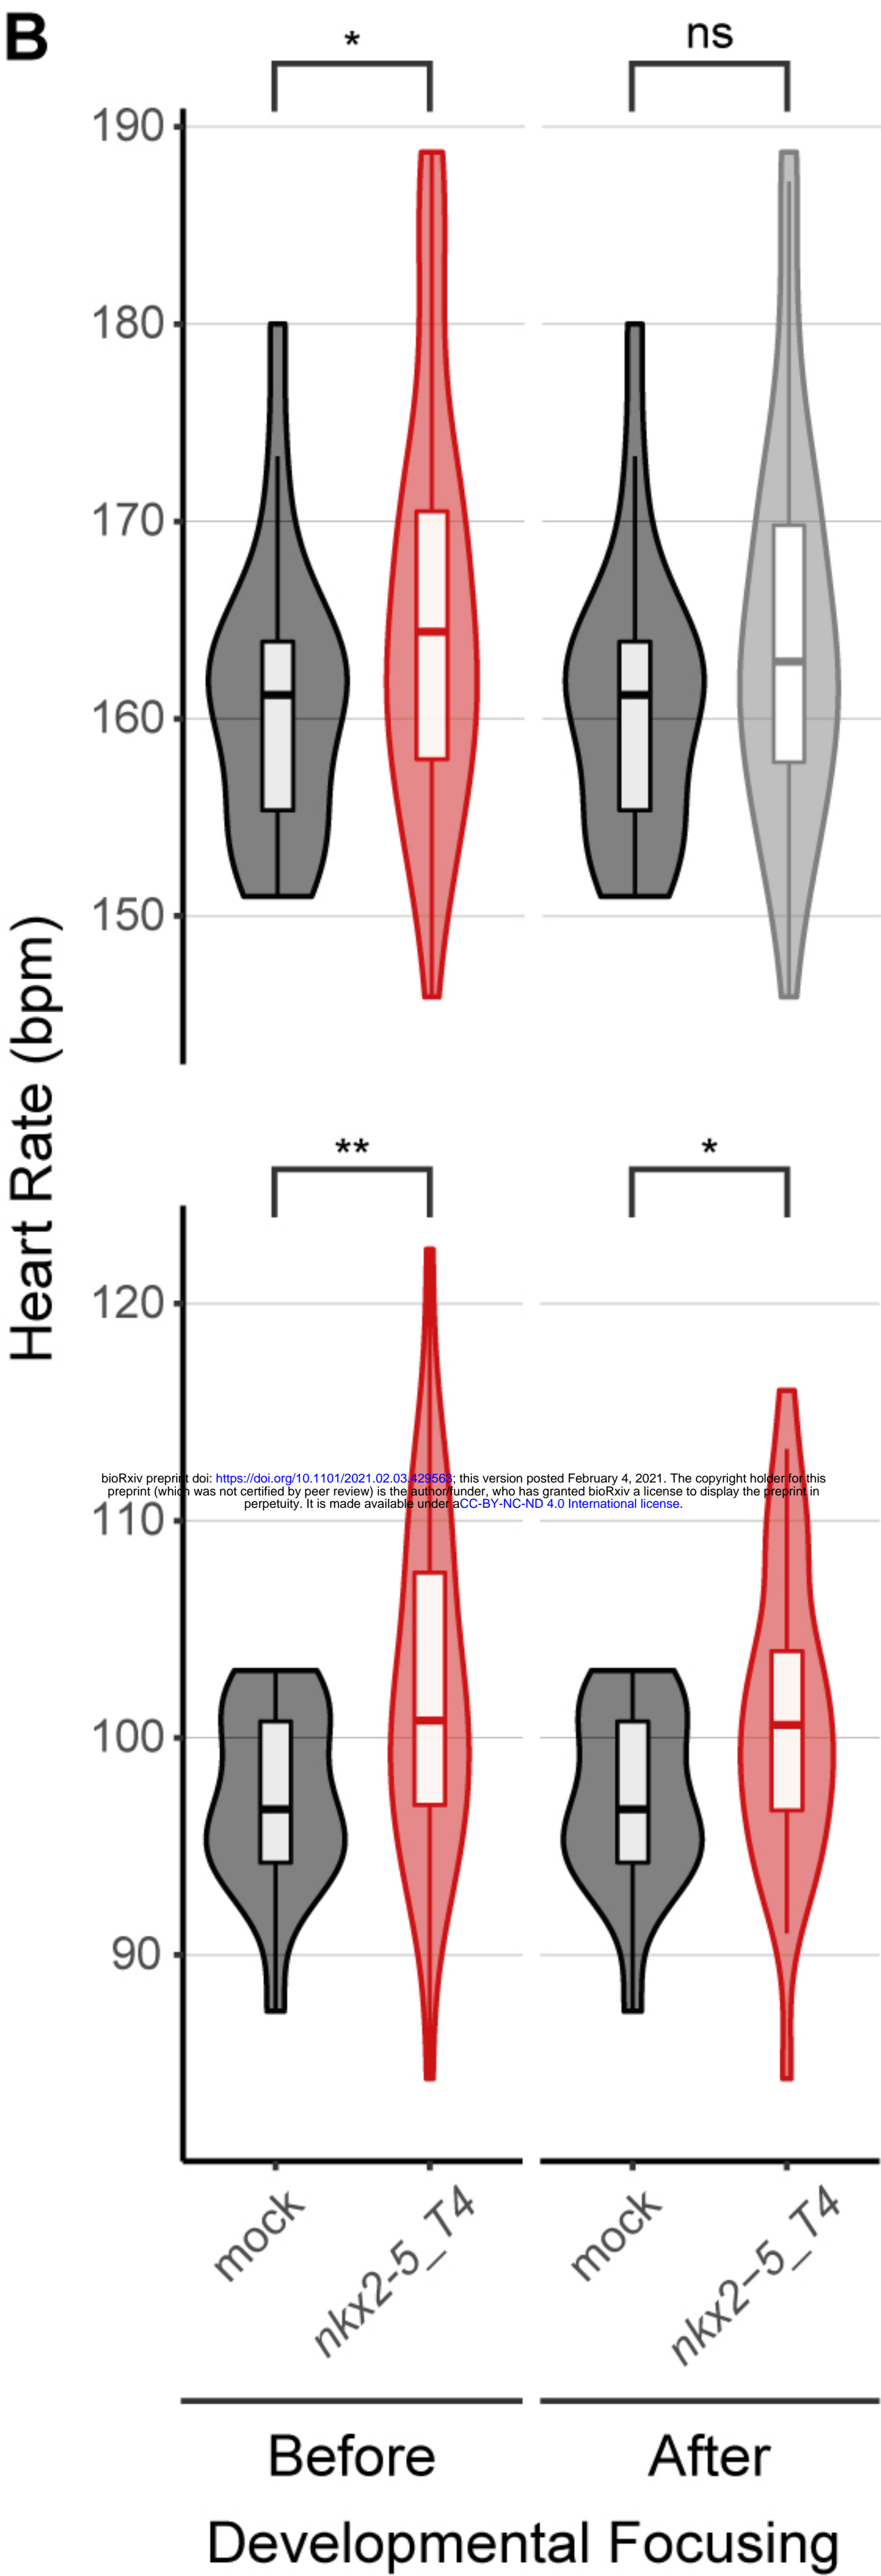

**C**

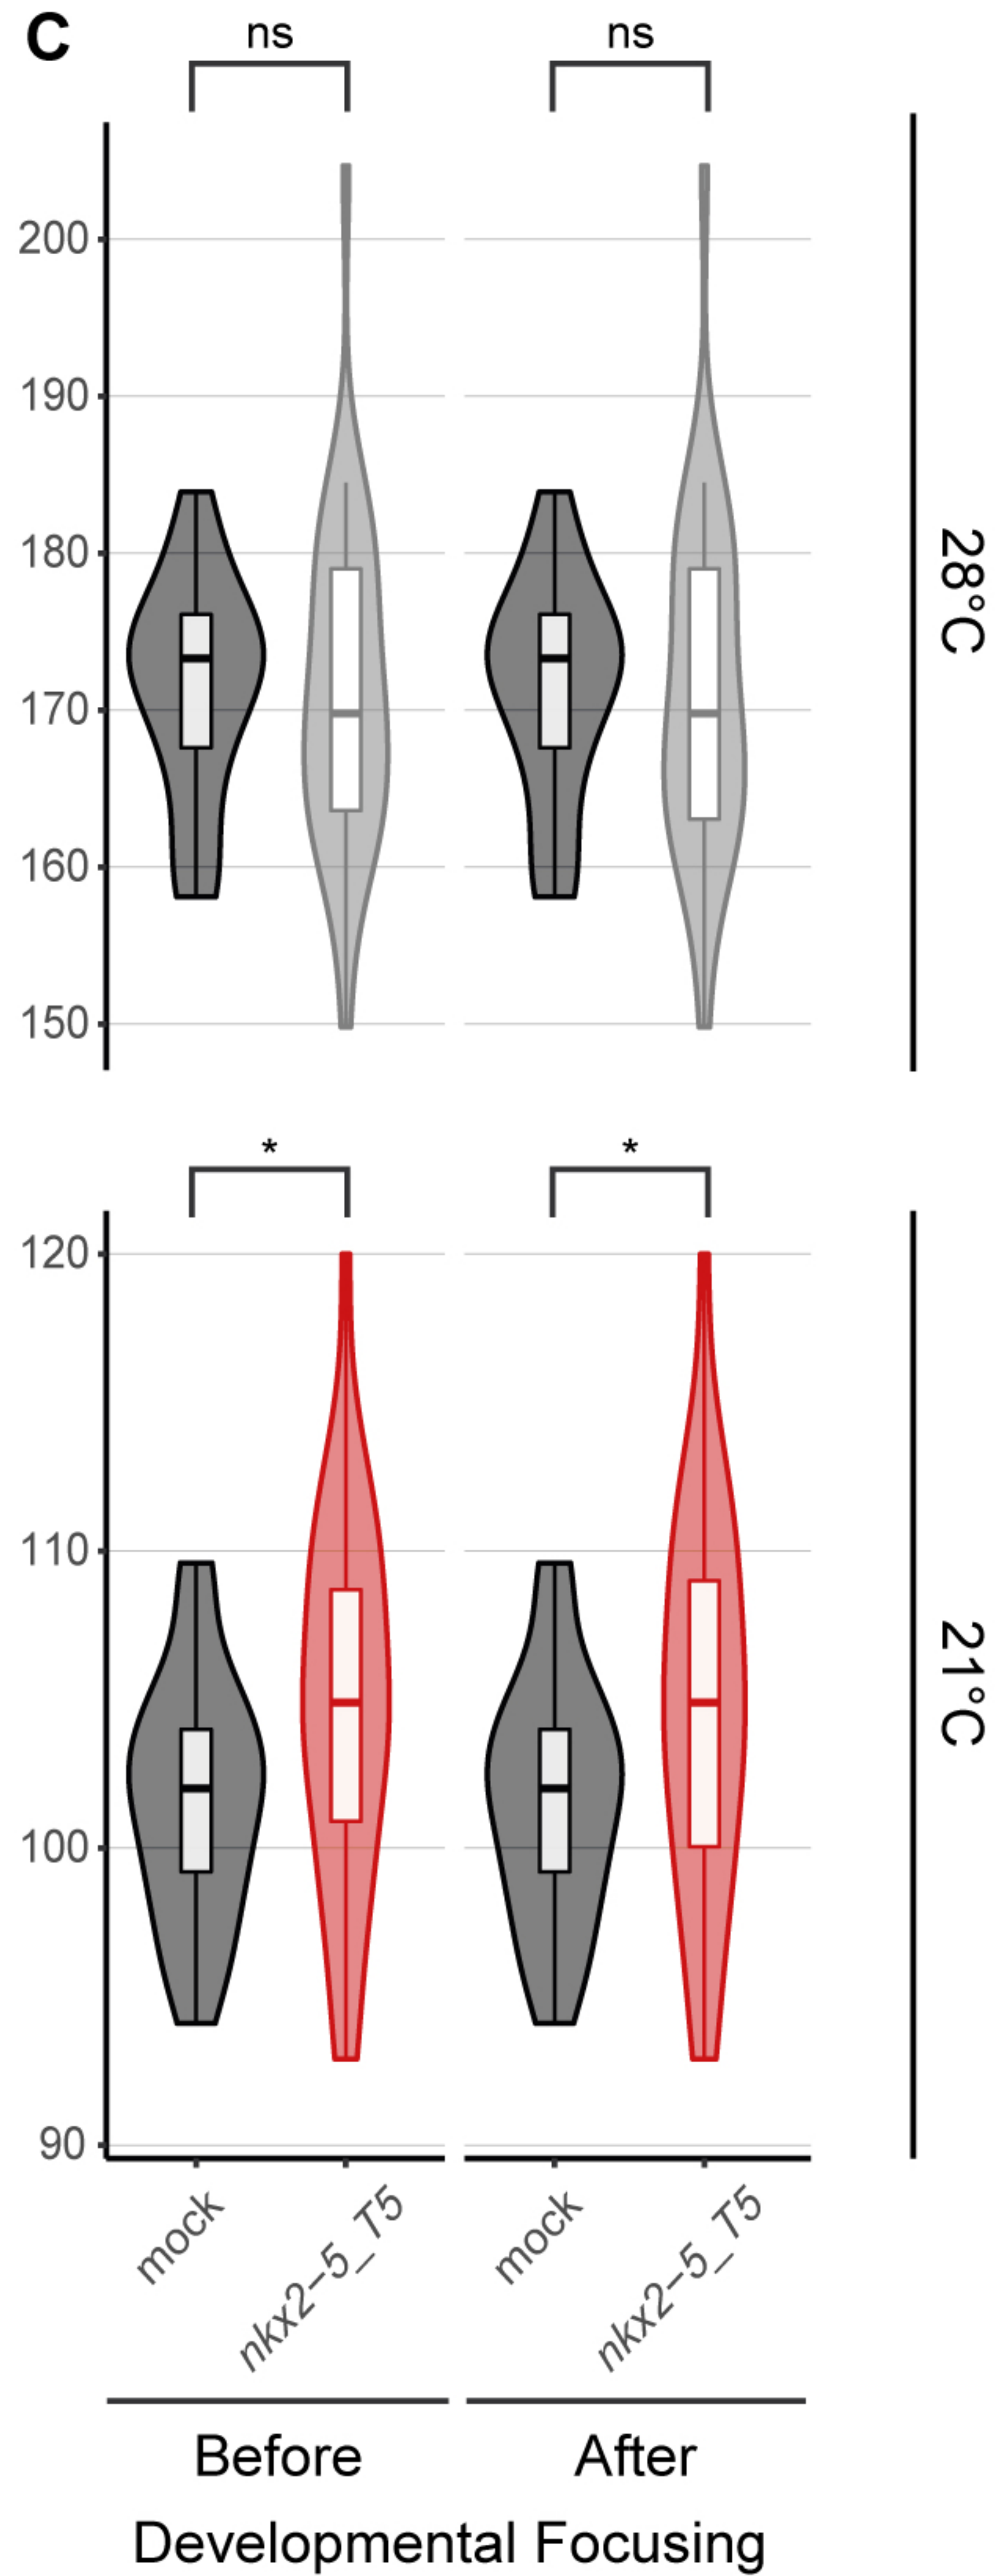



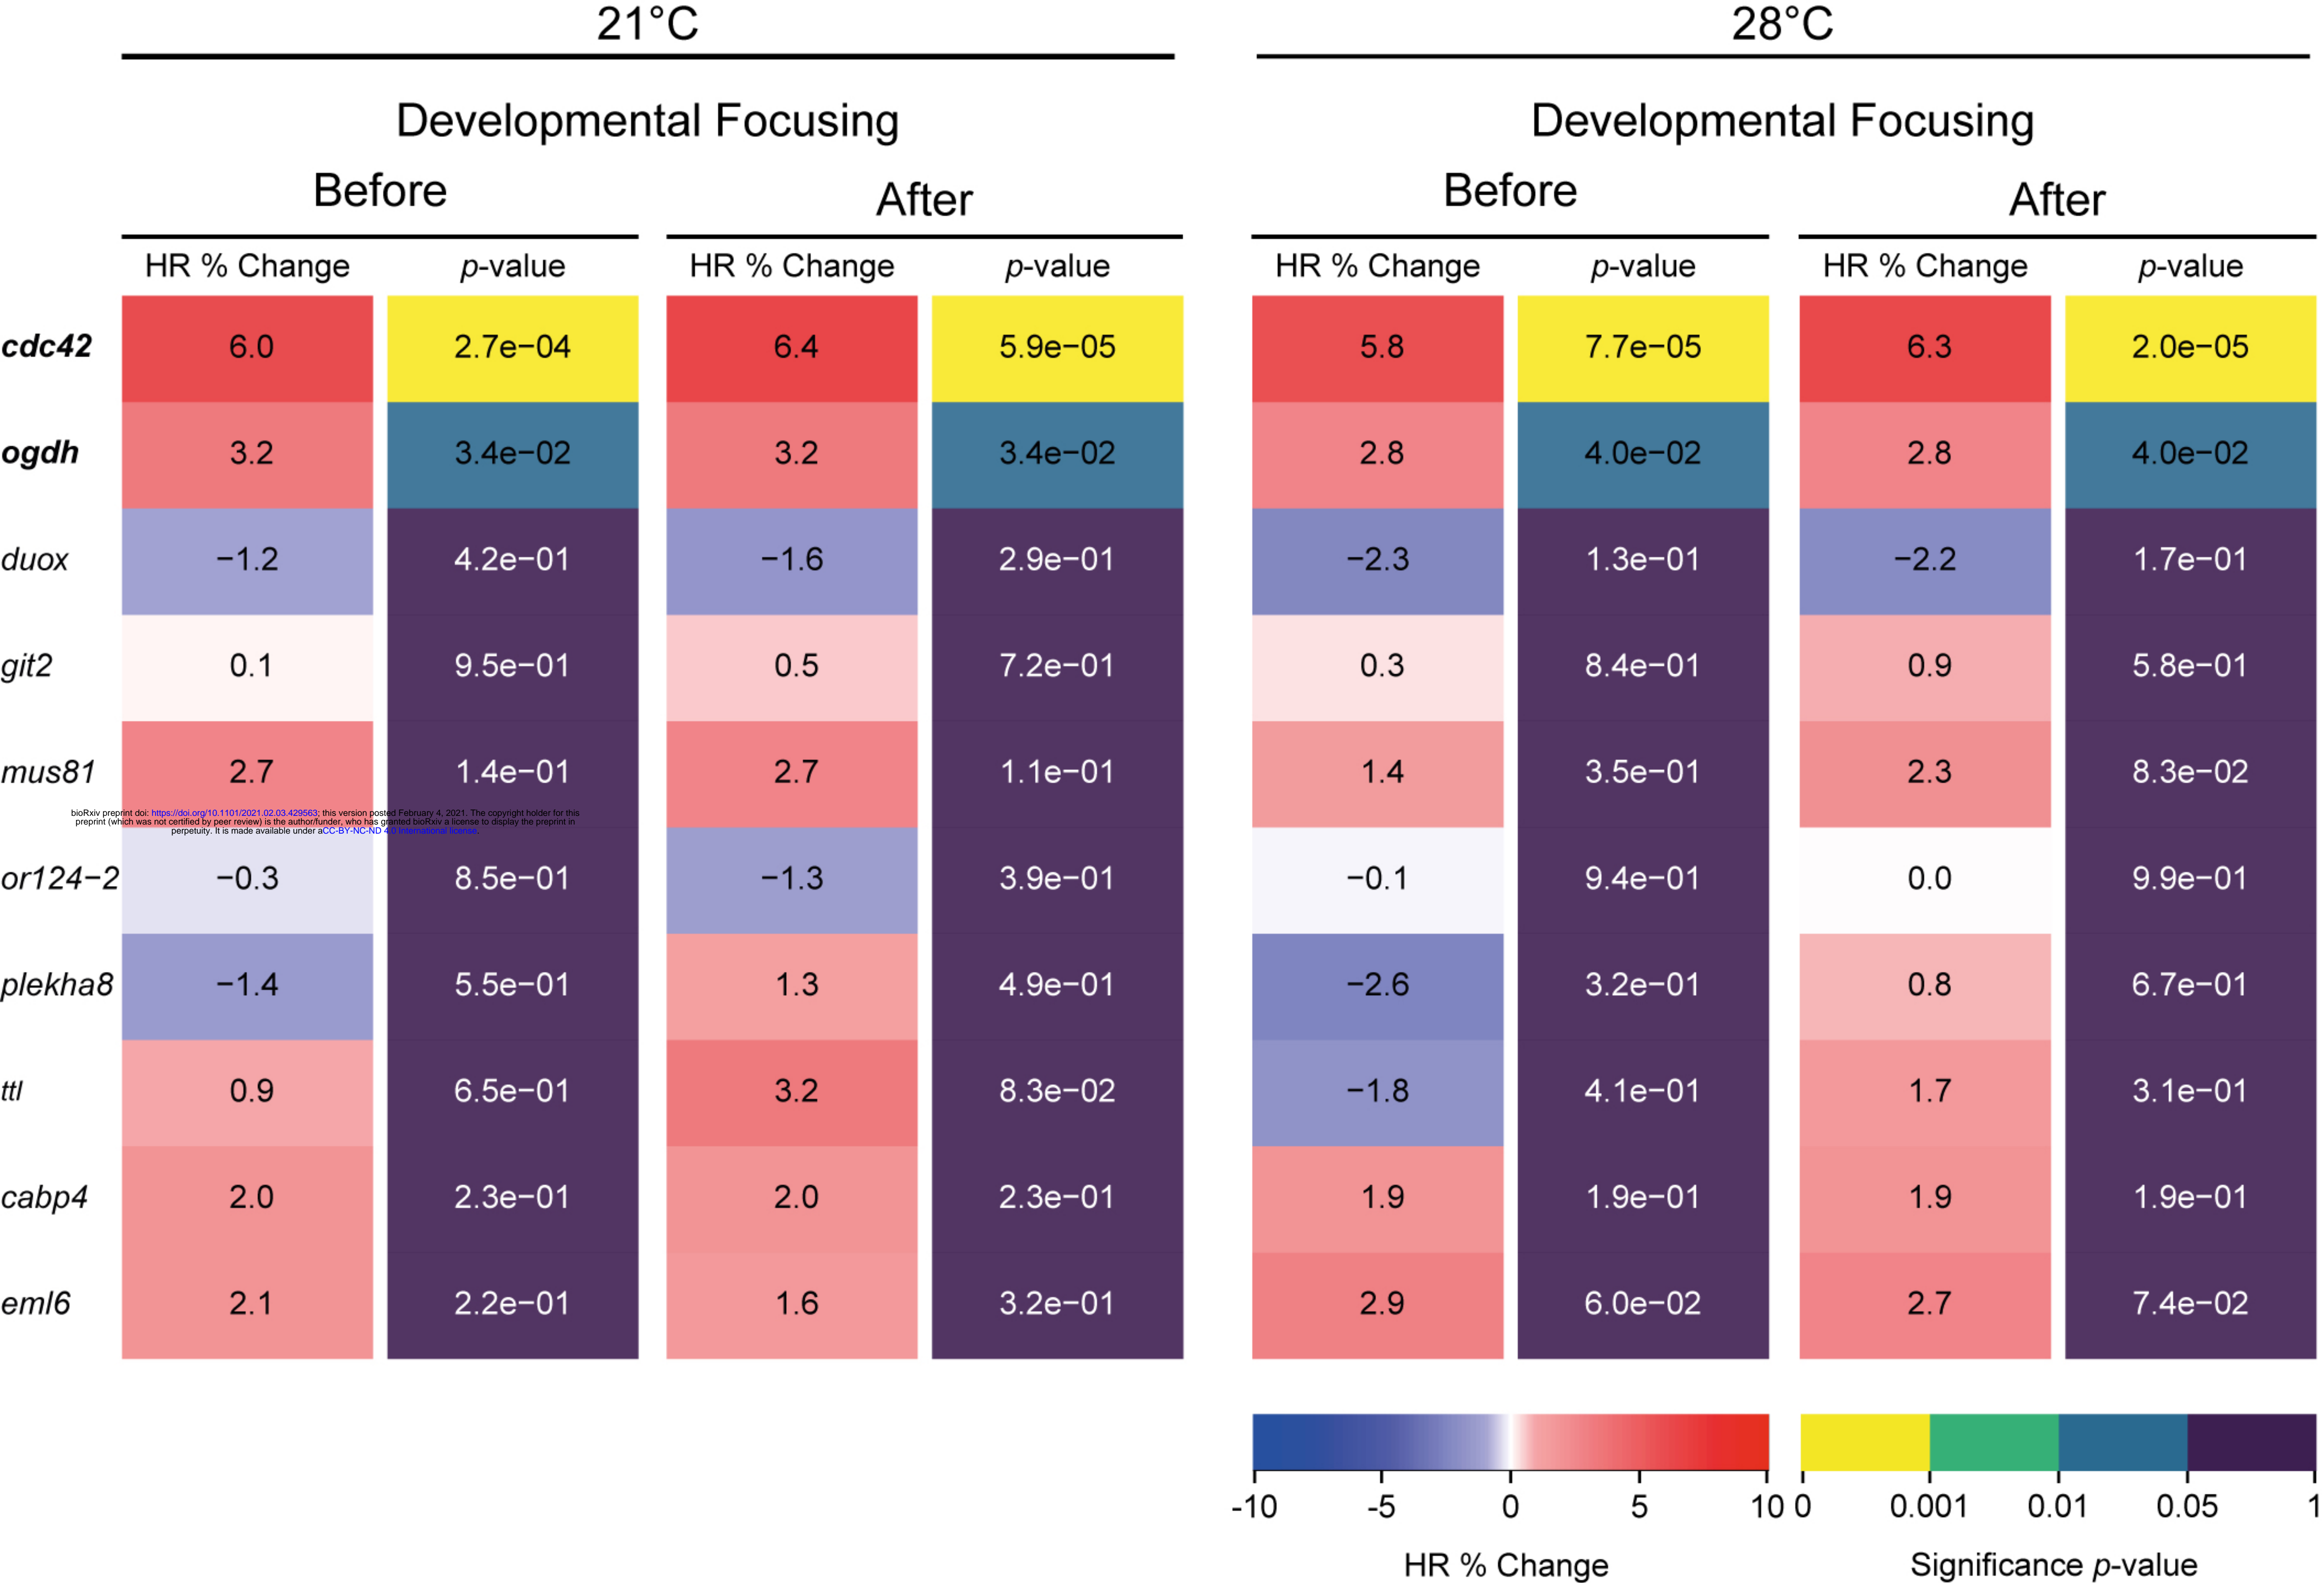



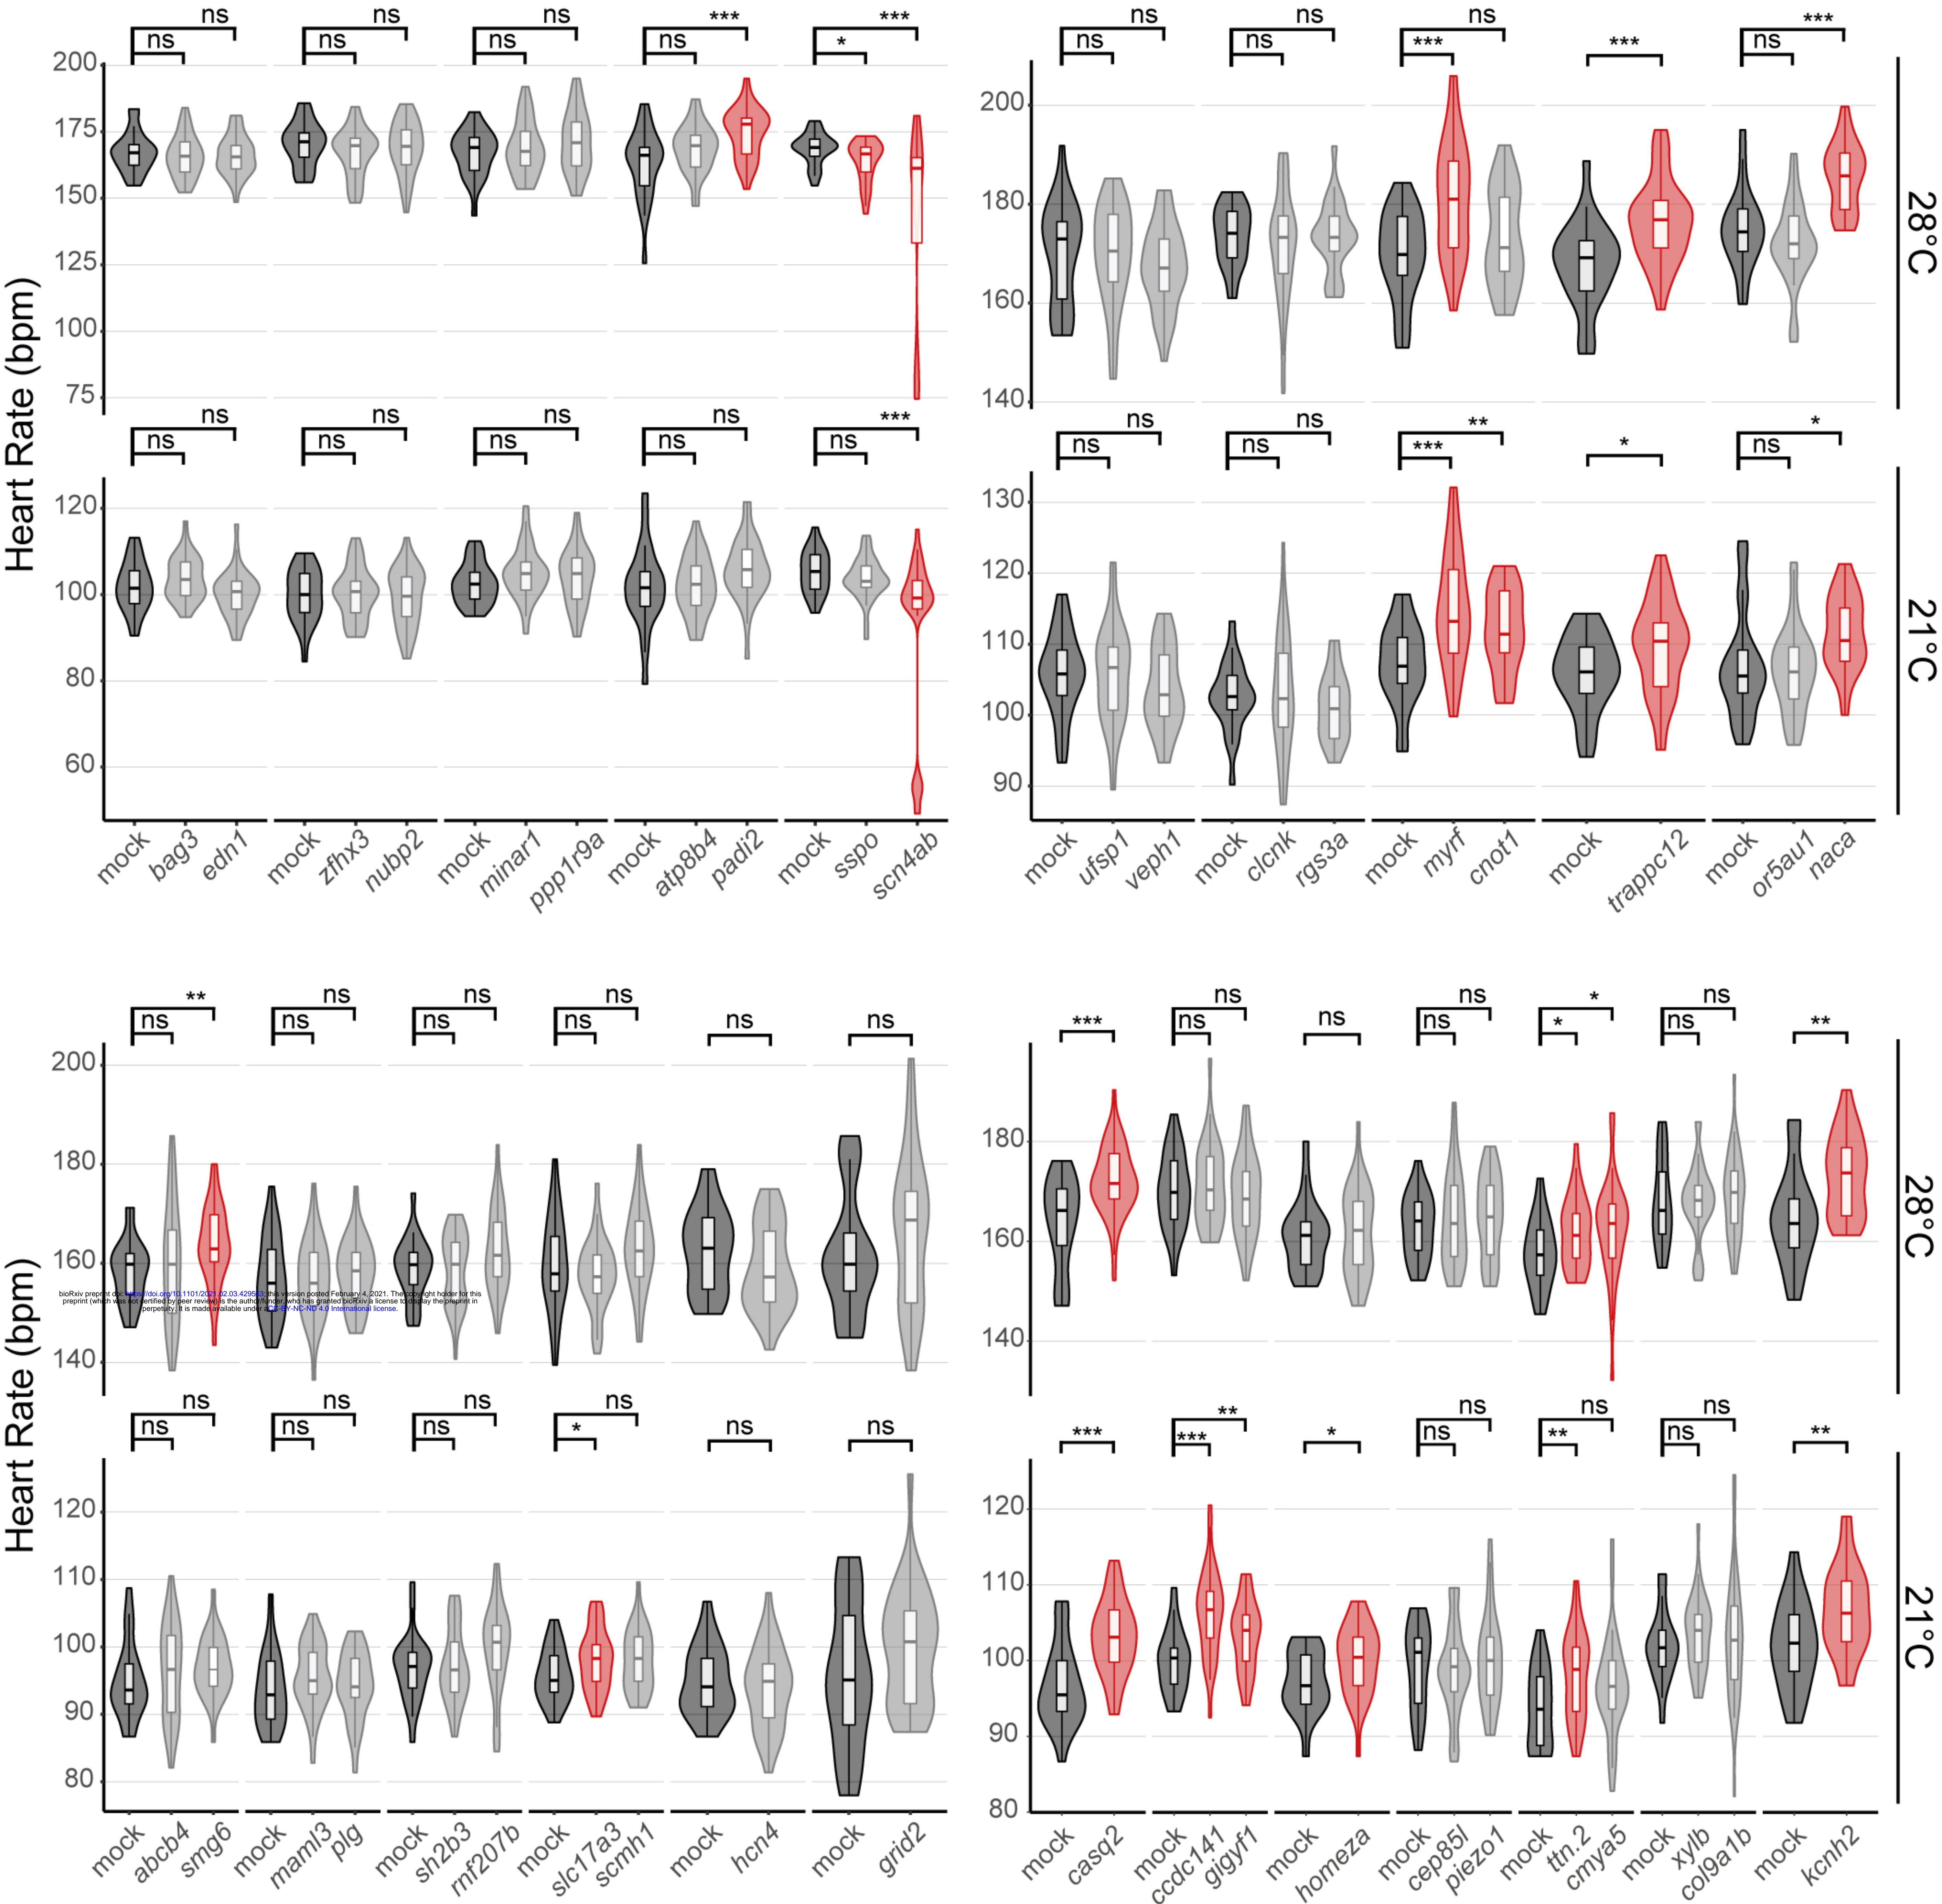

Hammouda et al. Figure S3



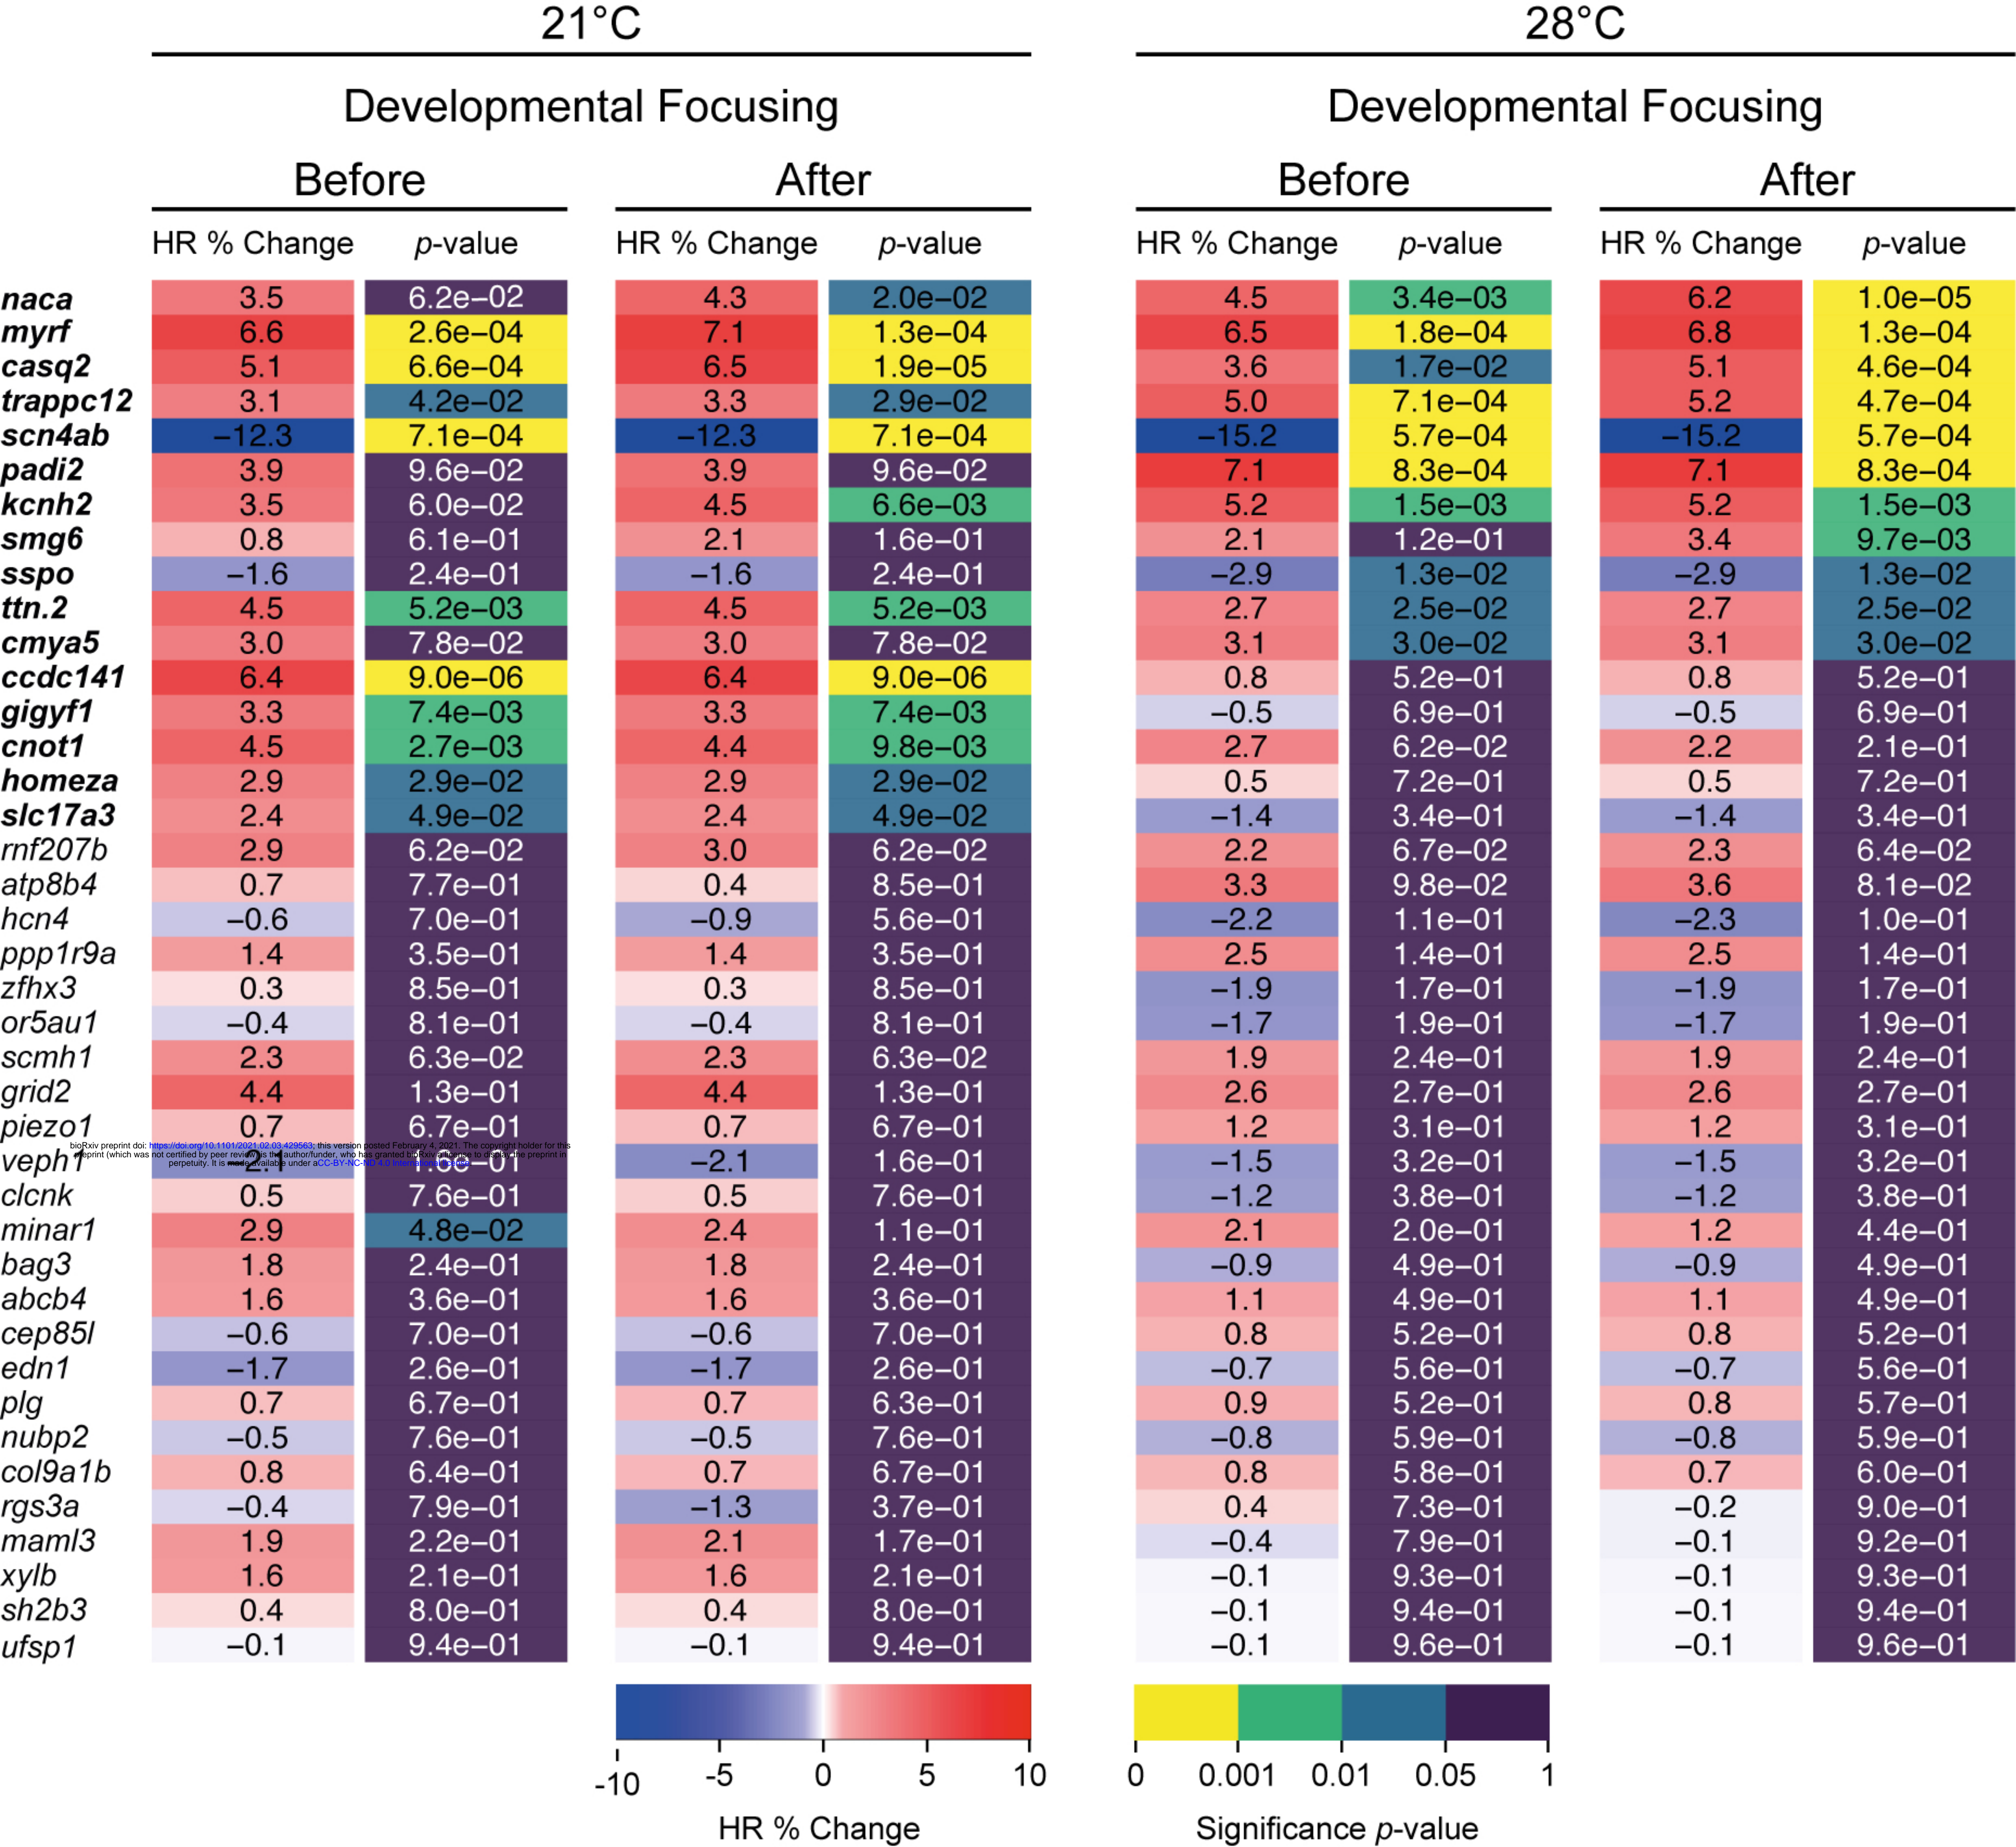



**Table S1.** List of sgRNAs used

Protospacer adjacent motif (PAM) in target sequence enclosed in square brackets “[”]

| <b>sgRNA</b>      | <b>Target sequence [PAM]</b> |
|-------------------|------------------------------|
| <i>abcb4_T7</i>   | ATGTCCCTGAGTGTGAAGAG[TGG]    |
| <i>atp8b4_T2</i>  | TAAGTTCTACGATAACACCC[TGG]    |
| <i>bag3_T1</i>    | GAGCAGGGCGCCGTTACACC[GGG]    |
| <i>cabp4_T9</i>   | GAATTTGACTACGATGCAGA[TGG]    |
| <i>casq2_T1</i>   | TGTTGTCTGGGATGGGTTCG[TGG]    |
| <i>ccdc141_T1</i> | CCAGGAACCTGAAGGTTGTC[AGG]    |
| <i>cdc42_T2</i>   | AGAGCGGAGAGAACTGGCT[CGG]     |
| <i>cep85l_T5</i>  | AACCCAGGACTTCTCAGATA[GGG]    |
| <i>clcnk_T10</i>  | TTCTCCACTGGAGTAGTTTT[TGG]    |
| <i>cmya5_T1</i>   | GTAGAACAGGTAATTCTCGT[TGG]    |
| <i>cnot1_T5</i>   | GCCAAGTGTTGACAATACTG[AGG]    |
| <i>col9a1b_T2</i> | GACGGACGCGTAGGCATTCC[AGG]    |
| <i>duox_T3</i>    | CATTCGGCACGCTTTCTCTA[AGG]    |
| <i>edn1_T4</i>    | GCCGACGGAGTCTGCGCGGA[GGG]    |
| <i>eml6_T2</i>    | CTGCGCTGTTCGCACGCTAA[AGG]    |
| <i>gigyf1_T3</i>  | GAATGAACCGGCATGAACGC[CGG]    |
| <i>git2_T3</i>    | TAAACGCCTTCGAAACACGG[AGG]    |
| <i>grid2_T8</i>   | AAAGGCTACGGCTAAGGGTC[TGG]    |
| <i>hcn4_T5</i>    | AAACTCCCTTCGAACTTGTG[AGG]    |
| <i>homeza_T1</i>  | GCTACCAGCAGGTGCGAGAT[TGG]    |
| <i>kcnh2_T1</i>   | CATCACTGCTGGGAGAACCG[GGG]    |
| <i>maml3_T19</i>  | TCATGTAAGGTGTCATCATA[GGG]    |
| <i>minar1_T1</i>  | GTTGCCGTCGGCGACGCGTA[GGG]    |
| <i>mus81_T7</i>   | AAGAGGATGGACGACCTCTG[TGG]    |
| <i>myrf_T1</i>    | CCTTATTGGAGTCCATATTG[TGG]    |
| <i>naca_T1</i>    | TTGGTCTTAGGCAAGTAACG[GGG]    |
| <i>nkx2-5_T4</i>  | GCCGCGGGTCCTCTTCTCCC[AGG]    |
| <i>nkx2-5_T5</i>  | CGGACAGACCCAAGCCCCGG[AGG]    |
| <i>nubp2_T4</i>   | GAAGTGAATGTGGCACTGTT[AGG]    |
| <i>oca2_T3</i>    | TTGCAGGAATCATTCTGTGT[GGG]    |
| <i>ogdh_T4</i>    | CAAAGCTGGACTTGGCCTCA[GGG]    |
| <i>or124-2_T1</i> | GCCCACGTGGTCTCGTACGC[CGG]    |
| <i>or5a1_T2</i>   | GTCATGGACTCTTGCCTGTA[TGG]    |
| <i>padi2_T4</i>   | AGACTGGTATTACGGTTAAG[AGG]    |
| <i>piezo1_T1</i>  | TTGGGAGCCCGGATGTAGTT[AGG]    |
| <i>plekha8_T9</i> | GCGGTGAAGCTTTCATAACA[CGG]    |
| <i>plg_T1</i>     | GGCAACGGGGCCAATTATCG[AGG]    |
| <i>ppp1r9a_T7</i> | TGGTTCTTAGGAGATTCGGG[TGG]    |
| <i>rgs3a_T6</i>   | GATCAAGTCACAGTCCAAGA[TGG]    |



|                    |                            |
|--------------------|----------------------------|
| <i>rnf207b_T2</i>  | TAGACTTGTTTGTACTGATC[TGG]  |
| <i>scmh1_T2</i>    | TCTGACCTGCGCTGTACGAG[TGG]  |
| <i>scn4ab_T2</i>   | TTAGGCTTAGCAATCCGCAA[CGG]  |
| <i>sh2b3_T1</i>    | AAGAAGTCCGTCGCTGCAAT[CGG]  |
| <i>slc17a3_T5</i>  | GTCTTGGCGCCGATTGTGAC[AGG]  |
| <i>smg6_T2</i>     | AAAGATAAAACCAAGGGCGT[AGG]  |
| <i>sspo_T4</i>     | GTGCACCAAGTCATGTGGTT[GGG]  |
| <i>trappc12_T2</i> | CAACACGCAGTGCCTCAAGC[TGG]  |
| <i>ttnl_T1</i>     | GCTGGTAAATTACTACAGAG[GGG]  |
| <i>ttn.2_T1</i>    | GAGCTAGCTGTCAAAGCCAT[GGG]  |
| <i>ufsp1_T1</i>    | GCTGGAGAGCATCGCAGTCC[AGG]  |
| <i>veph1_T1</i>    | GGCTCTGGTGGAGGTGTCCC[AGG]  |
| <i>xylb_T1</i>     | TTTCCAGTGTCAGTACCTAC[AGG]  |
| <i>zfhx3_T1</i>    | AGCTGAGCGCACCCCTGCCTG[AGG] |

**Table S2.** List of primers used for genotyping by PCR

| <b>sgRNA</b>      | <b>Primers (5' – 3' direction)</b> |
|-------------------|------------------------------------|
| <i>abcb4 Lf</i>   | CCTCTGCAGAAGCTGGATGG               |
| <i>abcb4 Lr</i>   | TTTGCGATGGCGTGTGAGCG               |
| <i>atp8b4 Lf</i>  | ACCTACAGTCAAAGGGAAATGAGC           |
| <i>atp8b4 Lr</i>  | ACGCTGCCTCGTCTGGTGAC               |
| <i>bag3 Lf</i>    | CTTCGCTTAGGAGCCAGTCC               |
| <i>bag3 Lr</i>    | CAGTATGGTCTGAACCCGCC               |
| <i>cabp4 Lf</i>   | GTGCCATCTTGCCATGCTGC               |
| <i>cabp4 Lr</i>   | ATCCTGCTGCTCCTGGTCCC               |
| <i>casq2 Lf</i>   | CGAACAGGTCAAACCGTGTG               |
| <i>casq2 Lr</i>   | GGAACCTTGCACAAACGGACC              |
| <i>ccdc141 Lf</i> | GGCTACGGATGAAGGAGCTC               |
| <i>ccdc141 Lr</i> | TCCTGGCTAAGTGAAGCAGC               |
| <i>cdc42 Lf</i>   | TCCAGAGCTGCGAGGATGGC               |
| <i>cdc42 Lr</i>   | CCAGCCGCTCTGTTCTGGGC               |
| <i>cep85l Lf</i>  | AGGAGTGAGCTGAGGATGGG               |
| <i>cep85l Lr</i>  | GCATCCTCACTCTAGCCGGG               |
| <i>clcnk Lf</i>   | GATTCATGCTGTGTTCCCGC               |
| <i>clcnk Lr</i>   | CCACTGAGTTGGTCGCTTTG               |
| <i>cmya5 Lf</i>   | TTTGTGGGAGCTCGTCTGGG               |
| <i>cmya5 Lr</i>   | GCCACGCTGAGATGGAGCCC               |
| <i>cnot1 Lf</i>   | CCGGTTGTGGCGCCTTGAGG               |
| <i>cnot1 Lr</i>   | GCTTTGGGTCTGGCACTGCG               |
| <i>col9a1b Lf</i> | AGGGACTCACTTACCGGAAGCCC            |
| <i>col9a1b Lr</i> | CTGGTCCTCAGGGAGTGGCAGG             |
| <i>duox Lf</i>    | GACGCTGTCAGCTCGCACTG               |
| <i>duox Lr</i>    | GGTCCACTCATCGCTCCCTC               |
| <i>edn1 Lf</i>    | TCTCCGTGCTGTCAGTGTTT               |
| <i>edn1 Lr</i>    | ATGCTGGTTGCCATGGAGTC               |
| <i>eml6 Lf</i>    | ACGCCACGGACAGCATGGTC               |
| <i>eml6 Lr</i>    | TCACTGACAGCTTTGAAGGTTGACG          |
| <i>gigyf1 Lf</i>  | ACAGGAGATAGCAGCAGCAG               |
| <i>gigyf1 Lr</i>  | CGTCCCTGATTGTAGATTTGCG             |
| <i>git2 Lf</i>    | TTGCTGTCGCCGCTGCTCTG               |
| <i>git2 Lr</i>    | GGGCTCATGGGACCTTATGTTGG            |
| <i>grid2 Lf</i>   | ACCTACAGACCTGTAACCTCCTTCGC         |
| <i>grid2 Lr</i>   | ACCTGGAGCACCTACACCACAGG            |
| <i>hcn4 Lf</i>    | GACCCGTCAAGTGCCACAGG               |
| <i>hcn4 Lr</i>    | CACACCCTCCTTGTCCCTTG               |
| <i>homeza Lf</i>  | GCCAAGGAAGACCAAAGAGC               |

|                   |                                |
|-------------------|--------------------------------|
| <i>homeza Lr</i>  | TCACAAACCTCGCTCTAGGC           |
| <i>kcnh2 Lf</i>   | TCGCCCAGGCAAGTCCAACG           |
| <i>kcnh2 Lr</i>   | ACCTCATCGCCACTTGAGTGTG         |
| <i>maml3 Lf</i>   | CGGCAGCCATGTTGTCTGAC           |
| <i>maml3 Lr</i>   | AAGCGGGTTATGTGTGCTGC           |
| <i>minar1 Lf</i>  | CGGTCAGCATGAACTAAGCTTCGG       |
| <i>minar1 Lr</i>  | TGGAGACGGACAGTGATTCCAGTGG      |
| <i>mus81 Lf</i>   | GAAGACGACGAGACGGCCGG           |
| <i>mus81 Lr</i>   | TGACCCGAACAGTACCTTTGTG         |
| <i>myrf Lf</i>    | GGTCCACCAACCGCCTGCC            |
| <i>myrf Lr</i>    | AGCATCCTAGCATTGCAGCC           |
| <i>naca Lf</i>    | TCGCTCTCCTCCTGTACTGTAGGG       |
| <i>naca Lr</i>    | TCTGAGTCTACTGAAGCCAGCC         |
| <i>nkx2-5 lf</i>  | TAGCTTTGAGGCCTGCAGAC           |
| <i>nkx2-5 lr</i>  | CGCATAGTTCGTGTTGCAGG           |
| <i>nubp2 Lf</i>   | ACTGATGAGCCAGCCAACCC           |
| <i>nubp2 Lr</i>   | TGGTCTGTGGCCACATGGTG           |
| <i>oca2 Lf</i>    | GTAAAAACAGTTTCTTAAAAAAGAACAGGA |
| <i>oca2 Lr</i>    | AGCAGAAGAAATGACTCAACATTTTG     |
| <i>ogdh Lf</i>    | GAACACTCGTCTGGCCGGCC           |
| <i>ogdh Lr</i>    | TACAGCAAGTCCCGCCACG            |
| <i>or124-2 Lf</i> | TGAGGCTCAGACCCTCCTGG           |
| <i>or124-2 Lr</i> | ATGCGGTCCGGATGAGCTGG           |
| <i>or5aul Lf</i>  | GCATTCAGCAGTTCTTCTGTCTTC       |
| <i>or5aul Lr</i>  | GGCTTTGATAGATCTGTGTGGAAGC      |
| <i>padi2 Lf</i>   | GCATGACACTACCTGAGAATGAAAC      |
| <i>padi2 Lr</i>   | AGCCTCAGTCATCTCAGTAAAGC        |
| <i>piezo1 Lf</i>  | GCAGCAGCAGGAAGGTCAGG           |
| <i>piezo1 Lr</i>  | CCGCTGCATTAGACCACTGC           |
| <i>plekha8 Lf</i> | CTGGCACCTTCCTGTCCAGC           |
| <i>plekha8 Lr</i> | ACGGAAGTCGCCCAAGTCCG           |
| <i>plg Lf</i>     | CACAAACACAGCCGCACGCC           |
| <i>plg Lr</i>     | GTGGGCGTGTCCGAGTCGAC           |
| <i>ppp1r9a Lf</i> | CGAGGTCCAACCGAGGCAGC           |
| <i>ppp1r9a Lr</i> | TCTCTGTCAGATCTGAGCCGGG         |
| <i>rgs3a Lf</i>   | TGAGCTGTGTTGCCCCACTC           |
| <i>rgs3a Lr</i>   | GGAGGGCTTCAACTGTGAGG           |
| <i>rnf207b Lf</i> | GCAGAAGCCTCCCATTGACG           |
| <i>rnf207b Lr</i> | CCTCTGGCTGACCGCTCCTG           |
| <i>scmh1 Lf</i>   | ACTCTGTTCGAGCGCCTCCC           |
| <i>scmh1 Lr</i>   | AGGCGCATCCTGCAGCTTCC           |
| <i>scn4ab Lf</i>  | TCACCACTTCTGCAGGATGG           |
| <i>scn4ab Lr</i>  | GAGGCGTAGTGATCTGACGG           |

|                    |                          |
|--------------------|--------------------------|
| <i>sh2b3 Lf</i>    | TTTCTGCCGGCATCTGCTCC     |
| <i>sh2b3 Lr</i>    | CCTGCTGGTCGTTGTCCGTC     |
| <i>slc17a3 Lf</i>  | CCGCTGTGCCCAGGAGCAAG     |
| <i>slc17a3 Lr</i>  | AGGAAACGACCCGTGACCAC     |
| <i>smg6 Lf</i>     | CCCAGCATCAGTGGAGGTGC     |
| <i>smg6 Lr</i>     | CCCTGAGCCTCAGTCCCAGC     |
| <i>sspo Lf</i>     | TGCAGTCGAGGGTCAGTGGTCG   |
| <i>sspo Lr</i>     | CACAGGATCGCGGGCAAGAAGG   |
| <i>trappc12 Lf</i> | GTGCCTGCTGTACCTGGGCC     |
| <i>trappc12 Lr</i> | ACCACCACCCTCTCTCCCAGC    |
| <i>tll Lf</i>      | CCGGGCGGGACCAACAACCTG    |
| <i>tll Lr</i>      | GGAGTCAGACAGCTCTGGGC     |
| <i>ttn.2 Lf</i>    | CAGAGCTGGACGGACATCGG     |
| <i>ttn.2 Lr</i>    | GGAGCGCTGACGTCTGCCTC     |
| <i>ufsp1 Lf</i>    | TGGGAAAGGACTAGAGGAGGG    |
| <i>ufsp1 Lr</i>    | GACACTCGCTTCCAGGACAC     |
| <i>veph1 Lf</i>    | TCTGTCAGAGCGGATGCAAG     |
| <i>veph1 Lr</i>    | AGTCTCTGATCGGGATGCAAC    |
| <i>xylb Lf</i>     | CCTGCAGCAACATGGCAGTGTG   |
| <i>xylb Lr</i>     | ACCATCACTGTGGTCAATGGCTGC |
| <i>zfhx3 Lf</i>    | GGCTGGGTGGTGGGTGTCAG     |
| <i>zfhx3 Lr</i>    | TGTGCGGCTAGGTGGTGGAC     |

**Table 1.** List of randomly selected genes.  
 Medaka Ensembl gene names and codes, as well as orthologous human genes as annotated in the 95<sup>th</sup> Ensembl release.

| Ensembl ID         | Medaka Gene                                                                 | Orthologous Human Gene     |
|--------------------|-----------------------------------------------------------------------------|----------------------------|
| ENSORLG00000006335 | novel gene - <i>cdc42</i> (cell division control protein 42 homolog)        | na ( <i>CDC42</i> by name) |
| ENSORLG00000000979 | novel gene - <i>ogdh</i> (2-oxoglutarate dehydrogenase)                     | <i>OGDH</i>                |
| ENSORLG00000005268 | <i>duox</i> (dual oxidase 1)                                                | <i>DUOX1</i>               |
| ENSORLG00000007310 | <i>git2</i> (GIT ArfGAP2)                                                   | <i>GIT2</i>                |
| ENSORLG00000003492 | <i>mus81</i> (MUS81 Structure-Specific Endonuclease Subunit)                | <i>MUS81</i>               |
| ENSORLG00000020766 | <i>or124-2</i> (odorant receptor, family E 124, member 2)                   | na                         |
| ENSORLG00000007400 | <i>plekha8</i> (pleckstrin homology domain containing A8)                   | <i>PLEKHA8</i>             |
| ENSORLG00000022757 | <i>tth</i> (tubulin tyrosine ligase)                                        | <i>TTL</i>                 |
| ENSORLG00000005922 | <i>cabp4</i> (calcium binding protein 4)                                    | <i>CABP2</i>               |
| ENSORLG00000023106 | novel gene - <i>eml6</i> (echinoderm microtubule-associated protein-like 6) | <i>EML6</i>                |

**Table 2.** List of candidate genes extracted from Human GWAS using GRASP 2.0 Database

Human genes are categorized according to their association into “heart rate” (**bold**) and “non-heart rate” (non bold) related phenotypes in human GWAS.

| Human Gene      | Coding SNP ID | Associated heart phenotype      | Association Reference      | Medaka orthologue gene (Ensembl release) | Ensembl Gene Code            |
|-----------------|---------------|---------------------------------|----------------------------|------------------------------------------|------------------------------|
| <i>ATP8B4</i>   | rs2452524     | Pulse rate                      | (Hiura et al. 2010)        | <i>atp8b4</i> (98)                       | ENSORLG00000005106           |
| <i>CASQ2</i>    | rs4074536     | QRS interval                    | (Sotoodehnia et al. 2010)  | <i>casq2</i> (89)                        | ENSORLG00000017885           |
| <i>CCDC141</i>  | rs17362588    | Heart rate                      | (Hoed et al. 2013)         | na (89) (TBLASTN= <i>ccdc141</i> )       | TBLASTN = ENSORLG00000030409 |
| <i>CEP85L</i>   | rs3734381     | QRS interval                    | (Sotoodehnia et al. 2010)  | <i>cep85l</i> (91)                       | ENSORLG00000015455           |
| <i>CMYA5</i>    | rs10942901    | Heart rate                      | (Hoed et al. 2013)         | <i>cmya5</i> (91)                        | ENSORLG00000008983           |
| <i>COL9A1</i>   | rs592121      | Pulse rate                      | (Hiura et al. 2010)        | <i>col9a1b</i> (98)                      | ENSORLG00000010431           |
| <i>GIGYF1</i>   | rs221794      | Heart rate                      | (Hoed et al. 2013)         | <i>gigyf1</i> (89)                       | ENSORLG00000003655           |
| <i>GRID2</i>    | rs1385405     | Pulse rate                      | (Hiura et al. 2010)        | <i>grid2</i> (98)                        | ENSORLG00000024663           |
| <i>HOMEZ</i>    | rs1055061     | Sick sinus syndrome             | (Holm et al. 2011)         | <i>homeza</i> (89)                       | ENSORLG00000012220           |
| <i>KCNH2</i>    | rs1805123     | QT interval                     | (Pfeufer et al. 2009)      | <i>kcnh2</i> (98)                        | ENSORLG00000004137           |
| <i>MINAR1</i>   | rs2297773     | Pulse rate                      | (Hiura et al. 2010)        | <i>minar1</i> (98)                       | ENSORLG00000016707           |
| <i>MYRF</i>     | rs174535      | RR interval                     | (Eijgelsheim et al. 2010)  | <i>myrf</i> (91)                         | ENSORLG00000006459           |
| <i>NACA</i>     | rs2926743     | Heart rate                      | (Hoed et al. 2013)         | <i>naca</i> (98)                         | ENSORLG00000012246           |
| <i>OR5AUI</i>   | rs4982419     | Pulse rate                      | (Hiura et al. 2010)        | na (98) (TBLASTN=no name)                | TBLASTN = ENSORLG00000024679 |
| <i>PADI4</i>    | rs2240335     | Pulse rate                      | (Hiura et al. 2010)        | na (98) (TBLASTN= <i>padi2</i> )         | TBLASTN = ENSORLG00000007539 |
| <i>PPPIR9A</i>  | rs854524      | Pulse rate                      | (Hiura et al. 2010)        | <i>ppp1r9a</i> (98)                      | ENSORLG00000004418           |
| <i>RNF207</i>   | rs846111      | QT interval                     | (Newton-Cheh et al. 2009)  | <i>rnf207b</i> (91)                      | ENSORLG00000017207           |
| <i>SCN5A</i>    | rs1805126     | QRS interval                    | (Ritchie et al. 2013)      | na (89) (TBLASTN= <i>scn4ab</i> )        | TBLASTN = ENSORLG00000003273 |
| <i>SSPO</i>     | rs10261977    | Pulse rate                      | (Hiura et al. 2010)        | <i>sspo</i> (98)                         | ENSORLG00000004121           |
| <i>TRAPPC12</i> | rs6767        | Pulse rate                      | (Hiura et al. 2010)        | <i>trappc12</i> (98)                     | ENSORLG00000017859           |
| <i>TTN</i>      | rs12476289    | QT interval                     | (Marroni et al. 2009)      | <i>ttn.2</i> (91)                        | ENSORLG00000018144           |
| <i>UFSP1</i>    | rs12666989    | RR interval                     | (Eijgelsheim et al. 2010)  | na (89) (TBLASTN= <i>ufsp1</i> )         | TBLASTN = ENSORLG00000022928 |
| <i>XYLB</i>     | rs17118       | PR interval                     | (Smith et al. 2009)        | <i>xylb</i> (91)                         | ENSORLG00000003755           |
| <i>ABCB1</i>    | rs1128503     | Drug response CVD               | (Paré et al. 2013)         | <i>abcb4</i> (91)                        | ENSORLG00000009269           |
| <i>BAG3</i>     | rs3858340     | Sporadic dilated cardiomyopathy | (Villard et al. 2011)      | <i>bag3</i> (89)                         | ENSORLG00000013813           |
| <i>CLCNKA</i>   | rs1805152     | Sporadic dilated cardiomyopathy | (Villard et al. 2011)      | <i>clcnk</i> (89)                        | ENSORLG00000018693           |
| <i>CNOT1</i>    | rs11866002    | Aortic valve calcium            | (Thanassoulis et al. 2013) | <i>cnot1</i> (91)                        | ENSORLG00000013734           |

|                |             |                                 |                            |                                  |                                        |
|----------------|-------------|---------------------------------|----------------------------|----------------------------------|----------------------------------------|
| <i>EDN1</i>    | rs150035515 | Aortic valve calcium            | (Matsa et al. 2014)        | <i>edn1</i> (89)                 | ENSORLG00000009276                     |
| <i>HCN4</i>    | rs529004    | Aortic valve calcium            | (Thanassoulis et al. 2013) | <i>hcn4</i> (91)                 | ENSORLG00000013180                     |
| <i>MAML3</i>   | rs11729794  | Congenital heart malformations  | (Hu et al. 2013)           | na (91) (TBLASTN= <i>maml3</i> ) | TBLASTN = NCBI Ref Seq: XM_023954746.1 |
| <i>NUBP2</i>   | rs344359    | LV systolic dysfunction         | (Vasan et al. 2009)        | <i>nubp2</i> (91)                | ENSORLG00000007228                     |
| <i>PIEZO1</i>  | rs2290902   | Bicuspid aortic valve           | (Wooten et al. 2010)       | <i>piezo1</i> (91)               | ENSORLG00000000402                     |
| <i>PLG</i>     | rs13231     | Aortic valve calcium            | (Thanassoulis et al. 2013) | <i>plg</i> (91)                  | ENSORLG00000020532                     |
| <i>RGS3</i>    | rs12341266  | Hypertrophic cardiomyopathy     | (Wooten et al. 2013)       | <i>rgs3a</i> (91)                | ENSORLG00000006823                     |
| <i>SCMH1</i>   | rs10489520  | Ischemic stroke                 | (Ikram et al. 2009)        | <i>scmh1</i> (91)                | ENSORLG00000014207                     |
| <i>SH2B3</i>   | rs3184504   | Tetrology of fallot             | (Cordell et al. 2013)      | <i>sh2b3</i> (91)                | ENSORLG00000003569                     |
| <i>SLC17A3</i> | rs942379    | Bicuspid aortic valve           | (Wooten et al. 2010)       | <i>si:ch1073-513e17.1</i> (91)   | ENSORLG00000007671                     |
| <i>SMG6</i>    | rs216193    | Aortic root size                | (Vasan et al. 2009)        | <i>smg6</i> (91)                 | ENSORLG00000003317                     |
| <i>VEPH1</i>   | rs1378796   | Sporadic dilated cardiomyopathy | (Villard et al. 2011)      | <i>veph1</i> (89)                | ENSORLG00000012452                     |
| <i>ZFHX3</i>   | rs2228200   | Aortic valve calcium            | (Thanassoulis et al. 2013) | <i>zfhx3</i> (91)                | ENSORLG00000007874                     |
